# Supplementary material for: Orthogonal reactivity of Ni(i)/Pd(0) dual catalysts for Ullmann C–C cross-coupling: theoretical insight
Source: Royal Society of Chemistry journal article supplement (doi:10.1039/c8cc04127j), 2018-01-01
Supplement: c8cc04127j1.pdf [file c8cc04127j1.pdf]

**Electronic Supplementary Information**

**Orthogonal Reactivity of Ni(I)/Pd(0) Dual Catalysts for Ullman C-C  
Cross-Coupling: Theoretical Insight**

Bo Zhu,<sup>a</sup> Li-Kai Yan,<sup>a</sup> Li-Shuang Yao,<sup>b</sup> Hang Ren,<sup>a</sup> Run-Han Li,<sup>a</sup> Wei Guan,<sup>\*a,b</sup> and Zhong-Min Su<sup>\*a</sup>

<sup>a</sup> Faculty of Chemistry, National & Local United Engineering Lab for Power Battery, Key Laboratory of Polyoxometalate Science of Ministry of Education, Northeast Normal University, Changchun 130024 (P.R. China)

<sup>b</sup> State Key Laboratory of Applied Optics, Changchun Institute of Optics, Fine Mechanics and Physics, Chinese Academy of Sciences, Changchun 130033, (P.R. China)

## 1. Methods

### 1.1. Correction of translational entropy in solution

We evaluated the electronic energy ( $E_{sol}$ ) with zero-point energy correction in solution. For each species, the  $E_{sol}$  is defined through eqn (S1):

$$E_{sol} = E_{sol}^{pot} + E_{gas}^{v_0}$$

(S1)

where  $E_{sol}^{pot}$  is the potential energy including non-electrostatic energy in solution and  $E_{gas}^{v_0}$  represents the zero-point vibrational energy in the gas phase. In a bimolecular process, such as the coordination of Ni center to the C=C bond of Ph-Br, the entropy change must be taken into consideration because the entropy considerably decreases. In this case, Gibbs energy ( $G_{sol}^o$ ) must be evaluated as follows:

$$\begin{aligned} G_{sol}^o &= H_0 - T(S_r^o + S_v^o + S_t^o) \\ &= E^T + P\Delta V - T(S_r^o + S_v^o + S_t^o) \\ &= E_{sol} + E_{therm} - T(S_r^o + S_v^o + S_t^o) \end{aligned}$$

(S2)

where  $\Delta V$  is 0 in solution,  $E_{therm}$  is the thermal correction by translational, vibrational, and rotational movements, and  $S_r^o$ ,  $S_v^o$ , and  $S_t^o$  are rotational, vibrational, and translational entropies, respectively. In general, the Sackur-Tetrode equation is used to evaluate translational entropy  $S_t^o$ . In solution, however, the usual Sackur-Tetrode equation cannot be directly applied to the evaluation of  $S_t^o$ , because the translation movement is suppressed very much in solution.<sup>S1</sup> In this context, the translational entropy was corrected with the method developed by Whitesides et al., where the rotational entropy was evaluated in a normal manner. Thermal correction and entropy contributions of vibration movements to the Gibbs energy were evaluated with the frequencies calculated at 298.15 K and 1 atm.

### 1.2. Computational details for the reductive process of Pd<sup>II</sup>(dppp)Cl<sub>2</sub> and Ni<sup>II</sup>(bpy)Br<sub>2</sub> by Zn dust

The spin-polarized DFT calculations were carried out with the Dmol<sup>3</sup> code in the Materials Studio software package<sup>S2,S3</sup> at the generalized gradient approximation (GGA) level. The model of Zn with (3 × 8 × 1) supercell and perfect (101) surface presented by a three-layer slab were applied for the calculation. To avoid the interlayer interaction, a vacuum space of 15 Å was set along the z direction. The double numerical plus polarization (DNP) basis set<sup>S4</sup> and Perdew–Burke–Ernzerh (PBE) functional<sup>S5</sup> were adopted, which are the most common in materials and surface science. The size and quality of DNP basis set are comparable to that of the Gaussian 6-31G(d,p) basis set. The solvent effect of N,N-dimethylformamide (DMF) was evaluated by the conductor-like screening model (COSMO),<sup>S6</sup> where the dielectric constant was set as 37.219. The geometry optimizations was performed at γ points. The structure optimizations were based on the following points: (1) an energy tolerance of 2×10<sup>-5</sup> Ha; (2) a maximum force tolerance of 4×10<sup>-3</sup> Ha/Å; and (3) a maximum displacement tolerance of 5×10<sup>-3</sup> Å. To accelerate convergence of the self-consistent electron density, we used a mixing of Fermi smearing of 0.005 Ha and Pulay.

## References

- S1 (a) S. Sakaki, Y. Ohnishi and H. Sato, *The Chemical Record*, 2010, **10**, 29; (b) A. Ishikawa, Y. Nakao, H. Sato, and S. Sakaki, *Dalton Trans.*, 2010, **39**, 3279; (c) A. Ishikawa, Y. Nakao, H. Sato and S. Sakaki, *Inorg. Chem.*, 2009, **48**, 8154.
- S2 B. Delley, *J. Chem. Phys.*, 2000, **113**, 7756.
- S3 B. Delley, *J. Chem. Phys.*, 1990, **92**, 508.
- S4 L. Lou, P. Nordlander and R. E. Smalley, *J. Chem. Phys.*, 1992, **97**, 1858.
- S5 J. P. Perdew, K. Burke and M. Ernzerhof, *Phys. Rev. Lett.*, 1996, **77**, 3865.
- S6 A. Klamt and G. Schuurmann, *J. Chem. Soc. Perkin Trans.*, 1993, **2**, 799.
- 11 Gaussian 09, Revision D.01, M. J. Frisch, G. W. Trucks, H. B. Schlegel, G. E. Scuseria, M. A. Robb, J. R. Cheeseman, G. Scalmani, V. Barone, B. Mennucci, G. A. Petersson, H. Nakatsuji, M. Caricato, X. Li, H. P. Hratchian, A. F. Izmaylov, J. Bloino, G. Zheng, J. L. Sonnenberg, M. Hada, M. Ehara, K. Toyota, R. Fukuda, J. Hasegawa, M. Ishida, T. Nakajima, Y. Honda, O. Kitao, H. Nakai, T. Vreven, J. A. Montgomery, Jr., J. E. Peralta, F. Ogliaro, M. Bearpark, J. J. Heyd, E. Brothers, K. N. Kudin, V. N. Staroverov, R. Kobayashi, J. Normand, K. Raghavachari, A. Rendell, J. C. Burant, S. S. Iyengar, J. Tomasi, M. Cossi, N. Rega, J. M. Millam, M. Klene, J. E. Knox, J. B. Cross, V. Bakken, C. Adamo, J. Jaramillo, R. Gomperts, R. E. Stratmann, O. Yazyev, A. J. Austin, R. Cammi, C. Pomelli, J. W. Ochterski, R. L. Martin, K. Morokuma, V. G. Zakrzewski, G. A. Voth, P. Salvador, J. J. Dannenberg, S. Dapprich, A. D. Daniels, Ö. Farkas, J. B. Foresman, J. V. Ortiz, J. Cioslowski, and D. J. Fox, Gaussian, Inc., Wallingford CT, 2013.

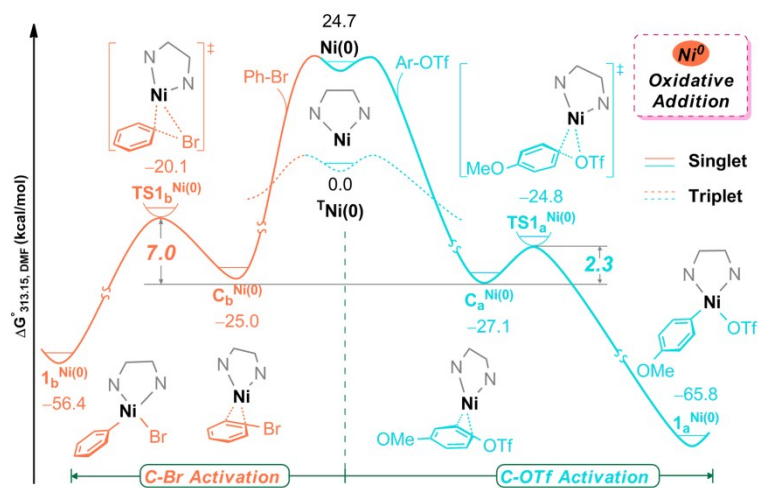

Fig. S1 Energy profiles ( $\Delta G^{\circ}_{313.15}$ ) of oxidative additions of bromobenzene and 4-methoxyphenyltriflate catalyzed by  $Ni^0(bpy)$ .

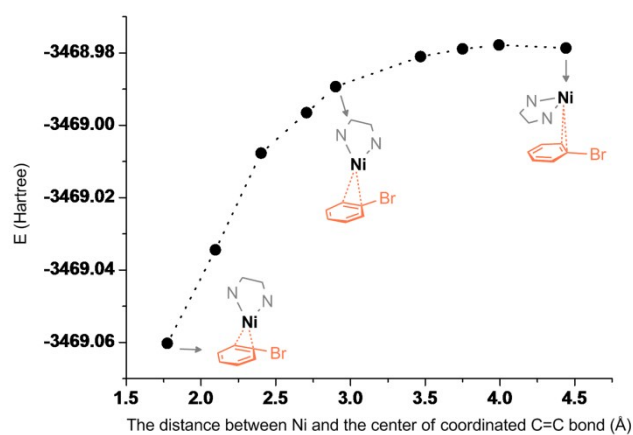

Fig. S2 Relaxed PES scan for the coordination of Ph-Br to  $Ni^0(bpy)$ .

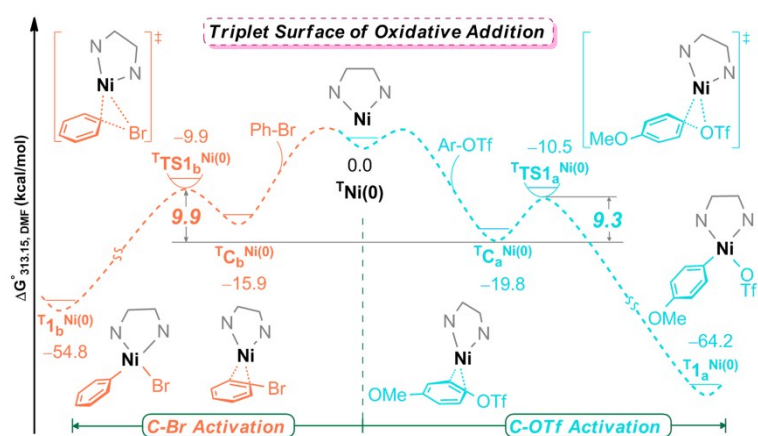

Fig. S3 The triplet energy profiles ( $\Delta G^{\circ}_{313.15}$ ) of oxidative additions of bromobenzene and 4-methoxyphenyltriflate catalyzed by  $Ni^0(bpy)$ .

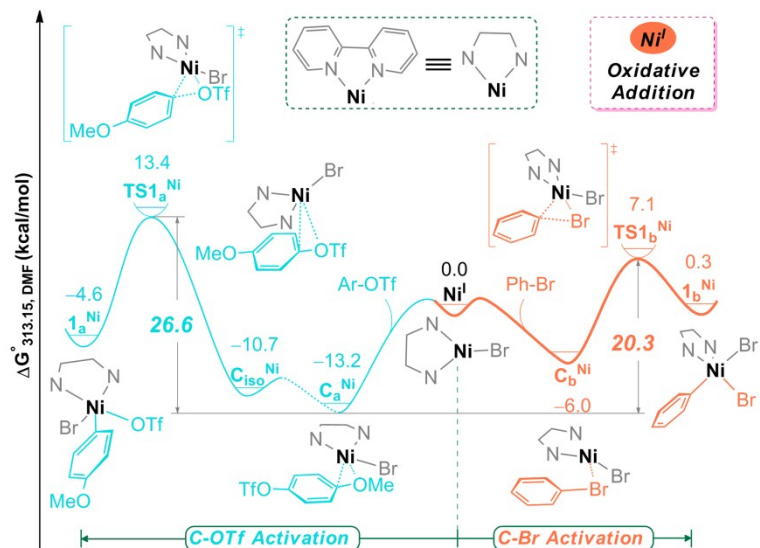

Fig. S4 Energy profiles ( $\Delta G^{\circ}_{313.15}$ ) of oxidative additions of bromobenzene and 4-methoxyphenyltriflate catalyzed by  $Ni^I(bpy)Br$ .

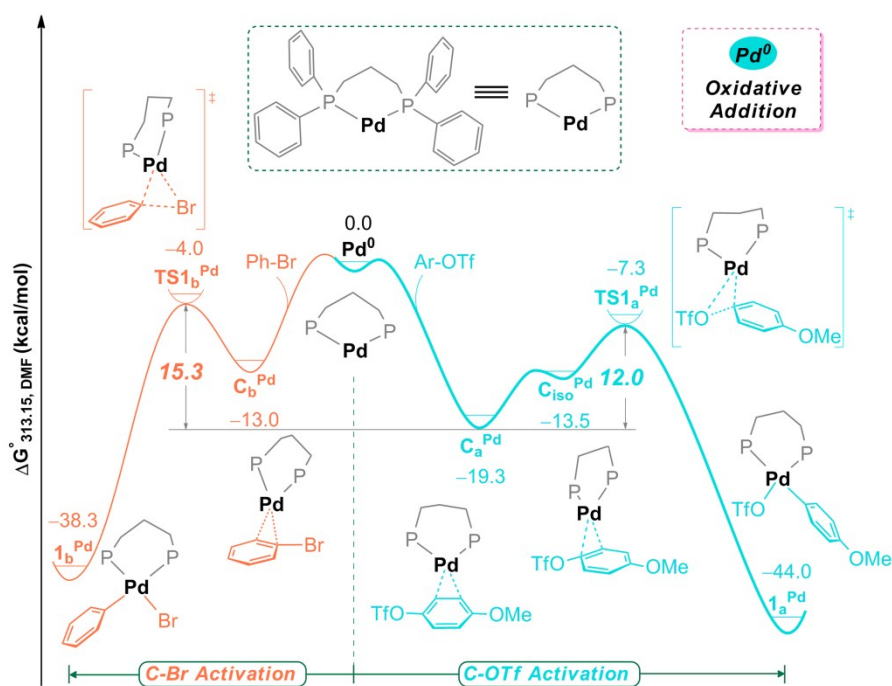

Fig. S5 Energy profiles ( $\Delta G^{\circ}_{313.15}$ ) of oxidative additions of bromobenzene and 4-methoxyphenyltriflate catalyzed by  $Pd^0(dppp)$ .

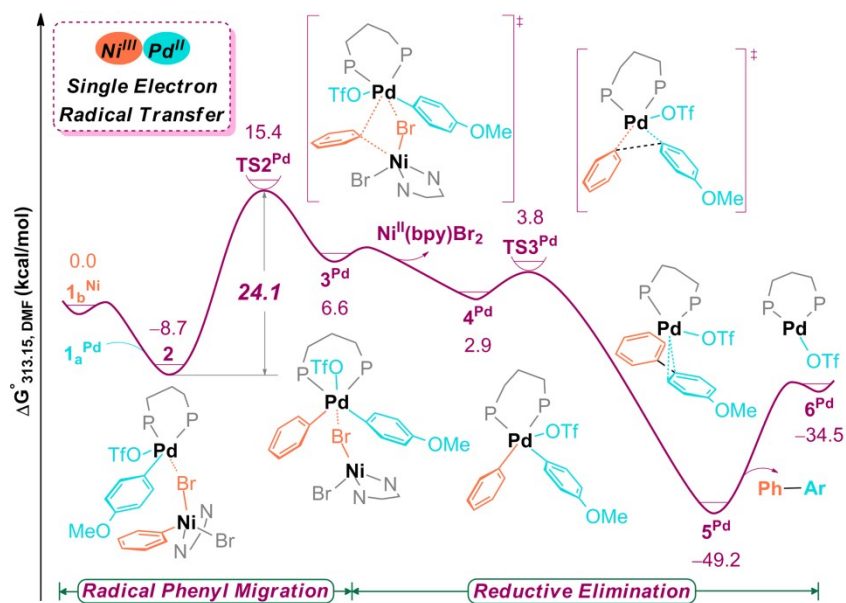

Fig. S6 Energy profiles ( $\Delta G^\circ_{313.15}$ ) of single electron radical transfer mechanism of Ni/Pd dual catalysis.

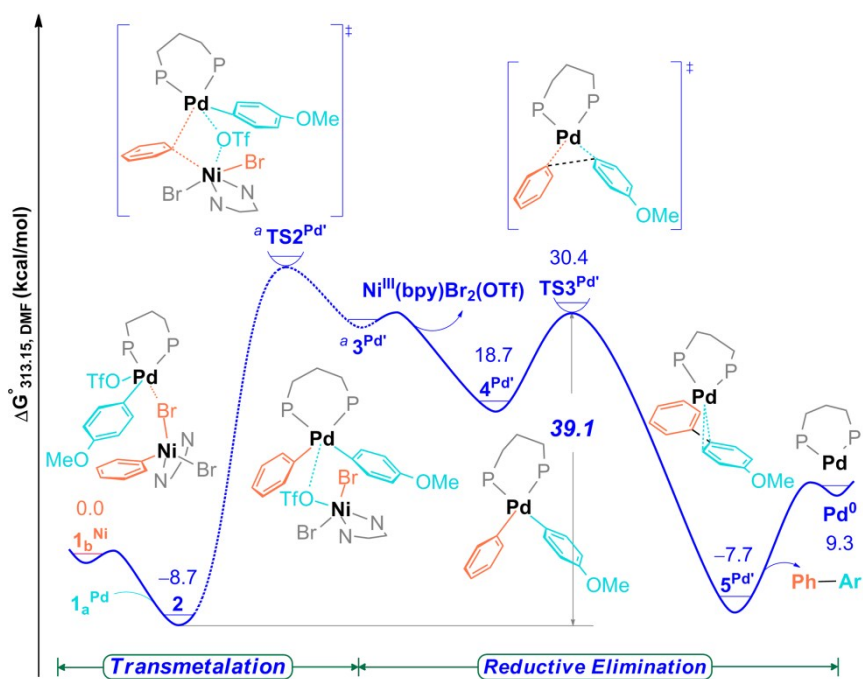

Fig. S7 Energy profiles ( $\Delta G^\circ_{313.15}$ ) of the phenyl migration from Ni<sup>III</sup> to Pd<sup>II</sup> without alternation of the oxidation states and reductive elimination from Pd<sup>II</sup> species.

<sup>a</sup> Proposed structure has not been located.

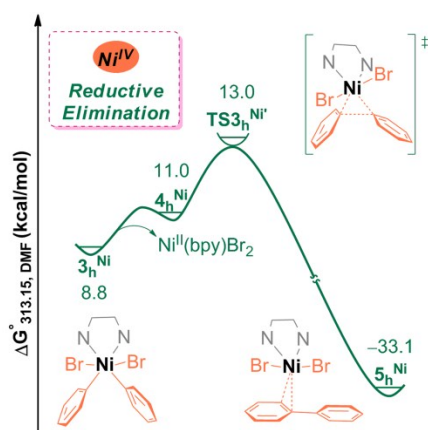

Fig. S8 Energy profiles ( $\Delta G_{313.15}^{\ddagger}$ ) of dissociated reductive elimination in the homobimetallic disproportionation mechanism.

## Coordinates of All Geometry Optimized Structures

| Ph-Br |            | HF = -2803.0087635 hartree |             |
|-------|------------|----------------------------|-------------|
| C     | 0.00000000 | 1.20541100                 | -2.16992500 |
| C     | 0.00000000 | 1.21383900                 | -0.77807200 |
| C     | 0.00000000 | 0.00000000                 | -0.10241000 |
| C     | 0.00000000 | -1.21383900                | -0.77807200 |
| C     | 0.00000000 | -1.20541100                | -2.16992500 |
| C     | 0.00000000 | 0.00000000                 | -2.86622200 |
| H     | 0.00000000 | 2.15055300                 | -2.70930300 |
| H     | 0.00000000 | 2.14976700                 | -0.22393100 |
| H     | 0.00000000 | -2.14976700                | -0.22393100 |
| H     | 0.00000000 | -2.15055300                | -2.70930300 |
| H     | 0.00000000 | 0.00000000                 | -3.95415600 |
| Br    | 0.00000000 | 0.00000000                 | 1.80023900  |

| Ar-OTf |            | HF = -1307.122161 hartree |             |
|--------|------------|---------------------------|-------------|
| C      | 1.43420400 | 1.04179000                | -0.43204500 |
| C      | 2.81157700 | 0.98038900                | -0.24194900 |
| C      | 3.43185200 | -0.26147800               | -0.08002000 |
| C      | 2.66968900 | -1.43705400               | -0.10951400 |
| C      | 1.30062900 | -1.37761700               | -0.29856800 |
| C      | 0.70493500 | -0.13282900               | -0.45906400 |
| H      | 0.92964200 | 1.99611800                | -0.56419800 |
| H      | 3.38489200 | 1.90261700                | -0.22415000 |
| H      | 3.17834200 | -2.38994100               | 0.01706800  |
| H      | 0.69272800 | -2.27882600               | -0.32777800 |
| O      | 4.75782400 | -0.43112400               | 0.10787900  |
| C      | 5.57757300 | 0.72139100                | 0.14110400  |
| H      | 5.29474000 | 1.38952100                | 0.96612900  |
| H      | 6.59785200 | 0.36588900                | 0.29907200  |

|   |             |             |             |
|---|-------------|-------------|-------------|
| H | 5.52884000  | 1.27370300  | -0.80737700 |
| O | -0.68702800 | -0.06977400 | -0.70822600 |
| S | -1.61420900 | 0.05805300  | 0.60332600  |
| O | -1.45084200 | 1.35647100  | 1.22168300  |
| O | -1.55167000 | -1.15242800 | 1.39446200  |
| C | -3.20836100 | 0.05881600  | -0.32964100 |
| F | -3.32706200 | -1.06650600 | -1.00043900 |
| F | -3.23905600 | 1.08742100  | -1.14937800 |
| F | -4.17372100 | 0.15980200  | 0.56312900  |

**Ph-Ar**

**HF = -577.4035913 hartree**

|   |             |             |             |
|---|-------------|-------------|-------------|
| C | -0.50368300 | 1.28131900  | -0.37082700 |
| C | -1.88397700 | 1.36747500  | -0.39007900 |
| C | -2.66429700 | 0.25309400  | -0.06470300 |
| C | -2.03793800 | -0.94588200 | 0.27704600  |
| C | -0.64783900 | -1.01417600 | 0.29197200  |
| C | 0.14944400  | 0.08714400  | -0.02830900 |
| H | 0.08405300  | 2.15467100  | -0.65199200 |
| H | -2.38810000 | 2.29226600  | -0.66480400 |
| H | -2.61731700 | -1.82598300 | 0.54376900  |
| H | -0.17547400 | -1.95062900 | 0.58773800  |
| O | -4.00619200 | 0.43674200  | -0.10762800 |
| C | -4.83212400 | -0.66846100 | 0.19429300  |
| H | -4.65911400 | -1.03387300 | 1.21631600  |
| H | -5.86208400 | -0.31459600 | 0.10926700  |
| H | -4.67366200 | -1.49323200 | -0.51479500 |
| C | 3.67048100  | -1.25824900 | -0.35831600 |
| C | 2.28319500  | -1.17570000 | -0.38402500 |
| C | 1.62318400  | 0.00066800  | -0.00539200 |
| C | 2.40217000  | 1.09352200  | 0.39648400  |
| C | 3.78975000  | 1.01383400  | 0.41789100  |
| C | 4.43124000  | -0.16294300 | 0.04151100  |
| H | 4.16042700  | -2.18168500 | -0.66299300 |
| H | 1.70043100  | -2.03055400 | -0.72631800 |
| H | 1.91179000  | 2.01112400  | 0.72079300  |
| H | 4.37332100  | 1.87517400  | 0.73903300  |
| H | 5.51762200  | -0.22648700 | 0.05974400  |

**Ni<sup>II</sup>(bpy)Br<sub>2</sub>**

**HF = -5809.2800609 hartree**

|   |             |             |             |
|---|-------------|-------------|-------------|
| C | -1.71668500 | -0.72999800 | -0.11167900 |
| C | -2.86971500 | -1.50528100 | -0.18856800 |
| C | -2.74947000 | -2.87312300 | -0.39701700 |
| C | -1.48626200 | -3.43690500 | -0.52627200 |
| C | -0.38093200 | -2.60289800 | -0.43644400 |
| N | -0.49945200 | -1.29113200 | -0.23427500 |
| H | -3.64006900 | -3.49372000 | -0.45376600 |

|    |             |             |             |
|----|-------------|-------------|-------------|
| H  | -3.85199400 | -1.05457000 | -0.08022500 |
| H  | -1.35310000 | -4.50215300 | -0.68892900 |
| H  | 0.63523500  | -2.98627900 | -0.52497500 |
| C  | -1.71703800 | 0.72913600  | 0.11199000  |
| C  | -2.87046100 | 1.50381000  | 0.18897500  |
| C  | -0.38221900 | 2.60276100  | 0.43654700  |
| C  | -2.75091100 | 2.87172100  | 0.39733800  |
| H  | -3.85252500 | 1.05260100  | 0.08072500  |
| H  | 0.63374800  | 2.98669400  | 0.52496900  |
| H  | -3.64182600 | 3.49186300  | 0.45412200  |
| C  | -1.48798800 | 3.43617700  | 0.52645800  |
| H  | -1.35537300 | 4.50150100  | 0.68906100  |
| N  | -0.50007700 | 1.29092200  | 0.23441900  |
| Ni | 1.05077200  | 0.00028500  | -0.00007400 |
| Br | 1.49277900  | -0.44538100 | 2.25401900  |
| Br | 1.49210900  | 0.44609900  | -2.25424500 |

**Pd<sup>0</sup>(dppp)**

**HF = -1854.3302728 hartree**

|   |             |             |             |
|---|-------------|-------------|-------------|
| P | -1.92674800 | -0.21614000 | 0.03880600  |
| P | 1.92679900  | -0.21619700 | 0.03890600  |
| C | -1.30314900 | -0.36735200 | 1.78868100  |
| H | -2.10419700 | -0.06471100 | 2.48099900  |
| H | -1.16566200 | -1.44861000 | 1.94504000  |
| C | -0.00003600 | 0.37818200  | 2.11357500  |
| H | -0.00013000 | 0.58029200  | 3.19476900  |
| H | -0.00011900 | 1.37073700  | 1.63331100  |
| C | 1.30328800  | -0.36702800 | 1.78885300  |
| H | 2.10424700  | -0.06388500 | 2.48105000  |
| C | 2.74517000  | 1.43017700  | 0.00006600  |
| C | 3.28238800  | 1.83870000  | -1.22760200 |
| C | 2.84718200  | 2.29076500  | 1.09659200  |
| H | 3.19472100  | 1.18088000  | -2.09501600 |
| C | 3.92147500  | 3.06551200  | -1.35303700 |
| C | 3.47509600  | 3.52824600  | 0.96797300  |
| H | 2.43866900  | 2.00468000  | 2.06522000  |
| H | 4.34000200  | 3.36381600  | -2.31266500 |
| C | 4.01550200  | 3.91640900  | -0.25308800 |
| H | 3.54387700  | 4.18893800  | 1.83052600  |
| H | 4.50653500  | 4.88289700  | -0.35041600 |
| C | 3.36598900  | -1.36232700 | 0.12561400  |
| C | 3.24561200  | -2.61380100 | -0.48352900 |
| C | 4.54599000  | -1.04779000 | 0.80712800  |
| H | 2.32854800  | -2.85554500 | -1.02561800 |
| C | 4.28162400  | -3.54077900 | -0.40861200 |
| C | 5.58514300  | -1.96959500 | 0.87531800  |
| H | 4.65587600  | -0.07210800 | 1.28309400  |



|    |             |             |             |
|----|-------------|-------------|-------------|
| H  | 4.17683000  | -4.51293400 | -0.88729800 |
| C  | 5.45340400  | -3.21718900 | 0.26870200  |
| H  | 6.50220000  | -1.71455500 | 1.40393200  |
| H  | 6.26877900  | -3.93649700 | 0.32160500  |
| C  | -3.36558700 | -1.36273000 | 0.12520300  |
| C  | -3.24423600 | -2.61452100 | -0.48311300 |
| C  | -4.54621000 | -1.04830200 | 0.80567700  |
| H  | -2.32668400 | -2.85618800 | -1.02441700 |
| C  | -4.27990500 | -3.54189000 | -0.40841500 |
| C  | -5.58503800 | -1.97050100 | 0.87361400  |
| H  | -4.65681300 | -0.07241800 | 1.28106000  |
| H  | -4.17434800 | -4.51428300 | -0.88644900 |
| C  | -5.45233800 | -3.21838700 | 0.26782300  |
| H  | -6.50259300 | -1.71553100 | 1.40140000  |
| H  | -6.26745900 | -3.93799800 | 0.32051900  |
| C  | -2.74557900 | 1.43000600  | 0.00054900  |
| C  | -2.84781500 | 2.29015100  | 1.09740000  |
| C  | -3.28295400 | 1.83883200  | -1.22694900 |
| H  | -2.43919800 | 2.00382300  | 2.06591300  |
| C  | -3.47609600 | 3.52749700  | 0.96926600  |
| C  | -3.92240300 | 3.06550400  | -1.35190400 |
| H  | -3.19513200 | 1.18136000  | -2.09461200 |
| H  | -3.54504500 | 4.18784100  | 1.83207100  |
| C  | -4.01664700 | 3.91596100  | -0.25163400 |
| H  | -4.34104400 | 3.36404200  | -2.31140900 |
| H  | -4.50796600 | 4.88234200  | -0.34858800 |
| H  | 1.16616700  | -1.44827700 | 1.94559600  |
| Pd | -0.00000100 | -0.50294700 | -1.18391700 |

**C<sub>a</sub><sup>Pd</sup>**

**HF = -3161.491503 hartree**

|   |             |            |             |
|---|-------------|------------|-------------|
| P | 2.87583900  | 0.51191600 | -0.21971200 |
| P | -0.28502200 | 2.15803500 | -0.44227200 |
| C | 3.29034200  | 2.30934900 | -0.40160300 |
| H | 4.27807900  | 2.49465600 | 0.04690700  |
| H | 3.41204100  | 2.47245600 | -1.48386300 |
| C | 2.25375600  | 3.29262200 | 0.15138800  |
| H | 2.74511700  | 4.27190700 | 0.23721700  |
| H | 1.96696900  | 3.01999900 | 1.18013600  |
| C | 0.99463400  | 3.47879400 | -0.70123600 |
| H | 0.54367700  | 4.45984800 | -0.48913900 |
| C | -0.77005100 | 2.45809500 | 1.30540000  |
| C | -0.53469000 | 1.45166300 | 2.24707700  |
| C | -1.31632800 | 3.67372700 | 1.73040900  |
| H | -0.12172700 | 0.49632900 | 1.91043000  |
| C | -0.82169400 | 1.66075300 | 3.59396100  |
| C | -1.60925800 | 3.88102500 | 3.07340700  |

|    |             |             |             |
|----|-------------|-------------|-------------|
| H  | -1.51748000 | 4.46338000  | 1.00454100  |
| H  | -0.62661700 | 0.87215600  | 4.31905100  |
| C  | -1.35759300 | 2.87619500  | 4.00682700  |
| H  | -2.03270700 | 4.83054100  | 3.39645000  |
| H  | -1.58369200 | 3.04356600  | 5.05844600  |
| C  | -1.73019000 | 2.79079500  | -1.37713900 |
| C  | -1.63796900 | 3.75660900  | -2.38292300 |
| C  | -2.97159400 | 2.18587500  | -1.13633200 |
| H  | -0.68876900 | 4.24637800  | -2.59538800 |
| C  | -2.76211500 | 4.10650600  | -3.12964700 |
| C  | -4.09192300 | 2.53780900  | -1.87673000 |
| H  | -3.05987200 | 1.43016500  | -0.35327300 |
| H  | -2.67395500 | 4.86167900  | -3.90905400 |
| C  | -3.98835100 | 3.50007000  | -2.88094200 |
| H  | -5.04473300 | 2.05204300  | -1.67005100 |
| H  | -4.86269400 | 3.77451000  | -3.46834400 |
| C  | 4.25625300  | -0.26303400 | -1.14891900 |
| C  | 4.13966500  | -0.29450600 | -2.54467100 |
| C  | 5.35545700  | -0.87993400 | -0.54748700 |
| H  | 3.26851300  | 0.16192300  | -3.02170600 |
| C  | 5.10416400  | -0.92223700 | -3.32333500 |
| C  | 6.31343100  | -1.52381400 | -1.32742200 |
| H  | 5.46217400  | -0.86699500 | 0.53693900  |
| H  | 5.00118900  | -0.93853400 | -4.40686000 |
| C  | 6.19013600  | -1.54759300 | -2.71301100 |
| H  | 7.16112500  | -2.00955600 | -0.84680400 |
| H  | 6.93854300  | -2.05535100 | -3.31853400 |
| C  | 3.24233300  | 0.12635800  | 1.53238100  |
| C  | 3.68602600  | 1.06719000  | 2.46505400  |
| C  | 2.97571600  | -1.18107600 | 1.96490800  |
| H  | 3.90954400  | 2.08804800  | 2.15834400  |
| C  | 3.84666000  | 0.71398100  | 3.80353400  |
| C  | 3.14843500  | -1.53535800 | 3.29673900  |
| H  | 2.64033200  | -1.93044200 | 1.24416300  |
| H  | 4.18965400  | 1.45873300  | 4.51960200  |
| C  | 3.57569500  | -0.58417100 | 4.22225700  |
| H  | 2.94127700  | -2.55588300 | 3.61534900  |
| H  | 3.69931700  | -0.85710600 | 5.26863700  |
| H  | 1.26631900  | 3.47391100  | -1.76816300 |
| Pd | 0.61803900  | -0.01802300 | -0.73860600 |
| C  | -1.01426900 | -1.49598700 | -1.08977000 |
| C  | 0.23494500  | -2.17592300 | -1.23678500 |
| C  | 0.68934900  | -3.03134600 | -0.19070200 |
| C  | -0.05268700 | -3.20473900 | 0.96374500  |
| C  | -1.28479100 | -2.54120200 | 1.11275700  |
| C  | -1.73997400 | -1.73291000 | 0.10629300  |

|   |             |             |             |
|---|-------------|-------------|-------------|
| H | -1.53786500 | -1.10399800 | -1.96135700 |
| H | 0.67621200  | -2.25712600 | -2.22896300 |
| H | 0.33322000  | -3.85249200 | 1.74797300  |
| H | -1.87040200 | -2.65347300 | 2.02320800  |
| O | 1.87094800  | -3.69085800 | -0.24673400 |
| C | 2.65115400  | -3.59883200 | -1.42638200 |
| H | 3.57632800  | -4.14253000 | -1.21969500 |
| H | 2.13976100  | -4.06849700 | -2.27789400 |
| H | 2.89392900  | -2.55437600 | -1.67034800 |
| O | -2.92842200 | -0.99454300 | 0.34512000  |
| S | -4.28947800 | -1.36964800 | -0.41436100 |
| O | -4.04220200 | -1.88081200 | -1.74449500 |
| O | -5.18843600 | -0.26655500 | -0.16472400 |
| C | -4.89114000 | -2.79147000 | 0.61394200  |
| F | -4.77132200 | -2.48316700 | 1.89047500  |
| F | -4.18364200 | -3.86897500 | 0.34038800  |
| F | -6.15831600 | -2.99777800 | 0.31512300  |

**C<sub>iso</sub><sup>Pd</sup>**

**HF = -3161.4820922 hartree**

|   |             |             |             |
|---|-------------|-------------|-------------|
| C | 1.52008100  | -0.23470200 | 2.84172200  |
| C | 0.85208300  | -1.32343500 | 3.32728800  |
| C | -0.55887600 | -1.41620100 | 3.17365200  |
| C | -1.28041400 | -0.37572200 | 2.63122500  |
| C | -0.61720000 | 0.77696300  | 2.10080100  |
| C | 0.80753600  | 0.77661000  | 2.14027100  |
| H | 2.59474300  | -0.11843700 | 2.97411800  |
| H | 1.37521200  | -2.14058300 | 3.81977000  |
| H | -2.36645400 | -0.40789200 | 2.58623400  |
| H | -1.16743700 | 1.71420600  | 2.00294400  |
| O | -1.10171900 | -2.58097400 | 3.61748800  |
| C | -2.46798200 | -2.80344700 | 3.33724300  |
| H | -2.67400200 | -2.70643700 | 2.25880600  |
| H | -2.68909800 | -3.82321000 | 3.66167800  |
| H | -3.11577400 | -2.10285500 | 3.88470800  |
| O | 1.47630600  | 2.05217900  | 2.16135000  |
| S | 2.01757900  | 2.88567300  | 0.91486000  |
| O | 1.60353300  | 2.35941000  | -0.36815600 |
| O | 3.39780100  | 3.23358500  | 1.17388000  |
| C | 1.00988900  | 4.40514300  | 1.20605900  |
| F | 1.28148600  | 4.90531300  | 2.39332100  |
| F | -0.27391800 | 4.09633900  | 1.13104600  |
| F | 1.31226800  | 5.27825600  | 0.26460000  |
| P | -1.93259500 | -0.01418100 | -1.26167700 |
| P | 1.42991100  | -1.26901100 | -1.21881600 |
| C | -1.67711700 | -0.80555900 | -2.92509500 |
| H | -2.65280600 | -1.12653100 | -3.32031600 |

|   |             |             |             |
|---|-------------|-------------|-------------|
| H | -1.33171600 | 0.00909300  | -3.58035000 |
| C | -0.67351500 | -1.96242100 | -2.99080300 |
| H | -0.84378900 | -2.48482700 | -3.94273900 |
| H | -0.87879000 | -2.71257200 | -2.20916700 |
| C | 0.80547900  | -1.56324300 | -2.93962500 |
| H | 1.40988800  | -2.35040000 | -3.41421400 |
| C | 1.46484500  | -2.98896900 | -0.55611100 |
| C | 2.36111700  | -3.95235200 | -1.03148900 |
| C | 0.56137000  | -3.34444000 | 0.45037500  |
| H | 3.07933200  | -3.69043300 | -1.81025600 |
| C | 2.35251200  | -5.24147500 | -0.51030000 |
| C | 0.55157200  | -4.63491100 | 0.97386800  |
| H | -0.12745100 | -2.58843000 | 0.83896600  |
| H | 3.05682700  | -5.98189200 | -0.88601300 |
| C | 1.44799200  | -5.58417700 | 0.49349800  |
| H | -0.15120800 | -4.88994200 | 1.76568100  |
| H | 1.44781600  | -6.59241600 | 0.90405500  |
| C | 3.21326300  | -0.91010600 | -1.46620100 |
| C | 3.95047400  | -0.58992200 | -0.31857400 |
| C | 3.85918400  | -0.90255900 | -2.70518500 |
| H | 3.44746800  | -0.57748600 | 0.65192600  |
| C | 5.30286500  | -0.28693700 | -0.40256100 |
| C | 5.21376800  | -0.58489800 | -2.79176100 |
| H | 3.31210100  | -1.14795000 | -3.61465900 |
| H | 5.86353800  | -0.04612800 | 0.49899700  |
| C | 5.93732500  | -0.28045500 | -1.64416100 |
| H | 5.70425200  | -0.58016500 | -3.76374800 |
| H | 6.99506000  | -0.03376300 | -1.71503100 |
| C | -2.73388700 | 1.56726600  | -1.73785100 |
| C | -2.05292100 | 2.75341300  | -1.45453400 |
| C | -3.97432500 | 1.63075200  | -2.38229500 |
| H | -1.08511000 | 2.70203400  | -0.95180400 |
| C | -2.59810400 | 3.98629400  | -1.80443900 |
| C | -4.52012300 | 2.86100100  | -2.73114200 |
| H | -4.52177000 | 0.71359500  | -2.60460900 |
| H | -2.05772800 | 4.90220700  | -1.56967400 |
| C | -3.83342000 | 4.03962500  | -2.44170000 |
| H | -5.48716200 | 2.90338800  | -3.22950600 |
| H | -4.26681700 | 5.00062300  | -2.71301300 |
| C | -3.31614000 | -0.95895600 | -0.51817000 |
| C | -3.58459500 | -2.29304100 | -0.83803100 |
| C | -4.04515600 | -0.35792800 | 0.51818200  |
| H | -3.03990600 | -2.79066800 | -1.63993000 |
| C | -4.56015200 | -3.00683100 | -0.14331300 |
| C | -5.02346100 | -1.06619600 | 1.20425200  |
| H | -3.84276300 | 0.68165400  | 0.78602000  |

|    |             |             |             |
|----|-------------|-------------|-------------|
| H  | -4.75912700 | -4.04381200 | -0.40851900 |
| C  | -5.28103500 | -2.39740900 | 0.87774900  |
| H  | -5.58442300 | -0.57959600 | 2.00066100  |
| H  | -6.04409800 | -2.95471200 | 1.41783700  |
| H  | 0.96472100  | -0.63862100 | -3.51605800 |
| Pd | 0.00721800  | 0.10744800  | 0.10809900  |

**TS1<sub>a</sub><sup>Pd</sup>**      **HF = -3161.462374 hartree**       $\nu^\ddagger = -264.64 \text{ icm}^{-1}$

|   |             |             |             |
|---|-------------|-------------|-------------|
| C | 0.01864600  | 2.47842000  | 1.90181600  |
| C | -1.18487600 | 2.97140400  | 2.33760000  |
| C | -2.32912700 | 2.98983800  | 1.49566700  |
| C | -2.25053900 | 2.51270600  | 0.20556200  |
| C | -1.03519200 | 1.93041700  | -0.25783600 |
| C | 0.07026800  | 1.87362000  | 0.62699200  |
| H | 0.90098000  | 2.49259100  | 2.53921100  |
| H | -1.29106900 | 3.36234800  | 3.34839400  |
| H | -3.08594500 | 2.59143100  | -0.48638600 |
| H | -0.89321900 | 1.78883900  | -1.33078000 |
| O | -3.43369900 | 3.53909300  | 2.06174100  |
| C | -4.58294800 | 3.65903400  | 1.25033400  |
| H | -4.92675300 | 2.67583900  | 0.89491100  |
| H | -5.35765400 | 4.10884500  | 1.87552100  |
| H | -4.39261600 | 4.30855500  | 0.38354300  |
| O | 1.75899500  | 2.44776900  | -0.02208000 |
| S | 2.09295800  | 2.54613200  | -1.49692000 |
| O | 1.28443500  | 1.67833300  | -2.35118000 |
| O | 3.53609700  | 2.56917800  | -1.71399700 |
| C | 1.54131800  | 4.25309700  | -1.90966300 |
| F | 2.19659200  | 5.13230800  | -1.16683600 |
| F | 0.24034800  | 4.38676100  | -1.68849300 |
| F | 1.78829100  | 4.49462300  | -3.18943800 |
| P | -1.86682600 | -1.81000900 | -0.05987900 |
| P | 1.45473400  | -1.62492500 | 0.88136200  |
| C | -1.77165200 | -3.28851300 | 1.07512200  |
| H | -2.65734800 | -3.27401600 | 1.72376200  |
| H | -1.84698100 | -4.19226500 | 0.45349400  |
| C | -0.50294700 | -3.34920400 | 1.92386300  |
| H | -0.54268000 | -4.27058100 | 2.51985600  |
| H | -0.50479300 | -2.52326300 | 2.65456900  |
| C | 0.79355300  | -3.34025300 | 1.10282100  |
| H | 1.57004100  | -3.95566300 | 1.57847500  |
| C | 2.31151600  | -1.33047000 | 2.47432400  |
| C | 3.52506200  | -1.95695800 | 2.77707400  |
| C | 1.72045500  | -0.48784300 | 3.41886500  |
| H | 3.99683100  | -2.61414900 | 2.04506000  |
| C | 4.13683000  | -1.73940900 | 4.00572100  |

|    |             |             |             |
|----|-------------|-------------|-------------|
| C  | 2.33125300  | -0.27559300 | 4.65245400  |
| H  | 0.77584300  | 0.00490400  | 3.17971300  |
| H  | 5.08328200  | -2.22644400 | 4.23321500  |
| C  | 3.54020100  | -0.89870200 | 4.94391700  |
| H  | 1.86371000  | 0.38212600  | 5.38287100  |
| H  | 4.02269500  | -0.72825900 | 5.90453200  |
| C  | 2.82147700  | -1.80146100 | -0.31791900 |
| C  | 3.52310100  | -0.63903000 | -0.66011300 |
| C  | 3.17948400  | -3.01308100 | -0.91520900 |
| H  | 3.24640900  | 0.31403600  | -0.20396300 |
| C  | 4.56328800  | -0.68560900 | -1.57861300 |
| C  | 4.22084300  | -3.05685000 | -1.84000100 |
| H  | 2.65886000  | -3.93473900 | -0.66092400 |
| H  | 5.08931700  | 0.23115000  | -1.83813400 |
| C  | 4.91272000  | -1.89703500 | -2.17233000 |
| H  | 4.49223600  | -4.00585600 | -2.29877900 |
| H  | 5.72368700  | -1.93547800 | -2.89720900 |
| C  | -1.83784000 | -2.52519900 | -1.74024100 |
| C  | -0.89525000 | -2.04196300 | -2.65279200 |
| C  | -2.70668200 | -3.55088100 | -2.13168300 |
| H  | -0.21394300 | -1.24290100 | -2.34979600 |
| C  | -0.81807000 | -2.57702000 | -3.93631500 |
| C  | -2.63201900 | -4.08064700 | -3.41398500 |
| H  | -3.45279900 | -3.93130500 | -1.43251800 |
| H  | -0.07877800 | -2.19695300 | -4.63863100 |
| C  | -1.68615600 | -3.59501700 | -4.31578500 |
| H  | -3.31253500 | -4.87583900 | -3.71217000 |
| H  | -1.62765200 | -4.01412100 | -5.31848200 |
| C  | -3.55972400 | -1.16591800 | 0.18780400  |
| C  | -3.92261400 | -0.77887300 | 1.48458900  |
| C  | -4.42659100 | -0.89212200 | -0.87191100 |
| H  | -3.23587800 | -0.94916000 | 2.31742500  |
| C  | -5.14558300 | -0.16310600 | 1.72010800  |
| C  | -5.64852300 | -0.26666600 | -0.63453600 |
| H  | -4.15203500 | -1.17077100 | -1.88901400 |
| H  | -5.41915300 | 0.12754000  | 2.73295800  |
| C  | -6.01387900 | 0.09106300  | 0.65931400  |
| H  | -6.32001900 | -0.06458000 | -1.46705500 |
| H  | -6.97088400 | 0.57630400  | 0.84261400  |
| H  | 0.60837500  | -3.76817100 | 0.10521300  |
| Pd | -0.25669600 | -0.09729000 | 0.31899900  |

$1_a^{Pd}$

**HF** = -3161.5270993 hartree

|   |            |            |             |
|---|------------|------------|-------------|
| C | 2.45603600 | 1.11856400 | -1.13564300 |
| C | 3.59110700 | 1.91974500 | -1.07908700 |
| C | 4.02448600 | 2.44342700 | 0.14099000  |

|   |             |             |             |
|---|-------------|-------------|-------------|
| C | 3.30905400  | 2.16096400  | 1.30552300  |
| C | 2.17027500  | 1.35742300  | 1.23009300  |
| C | 1.72260300  | 0.83239700  | 0.01825300  |
| H | 2.15231900  | 0.71777800  | -2.10366100 |
| H | 4.16434200  | 2.15038800  | -1.97661400 |
| H | 3.62654300  | 2.55391600  | 2.26891300  |
| H | 1.63187500  | 1.13686300  | 2.15524700  |
| O | 5.15011400  | 3.20711100  | 0.09564800  |
| C | 5.62958200  | 3.73610700  | 1.31156400  |
| H | 5.88808600  | 2.93987300  | 2.02473800  |
| H | 6.53013600  | 4.30508500  | 1.06783700  |
| H | 4.89480700  | 4.40824300  | 1.77813100  |
| O | -1.02200600 | 1.93709300  | -2.25712700 |
| S | -1.53333600 | 2.51605300  | -1.01251200 |
| O | -1.10263000 | 1.80066500  | 0.23237600  |
| O | -2.94957200 | 2.88797800  | -0.99294500 |
| C | -0.63182500 | 4.10871900  | -0.84025600 |
| F | -0.91366400 | 4.89714200  | -1.87100000 |
| F | 0.67529400  | 3.89502400  | -0.80796500 |
| F | -0.99444300 | 4.72063800  | 0.28060000  |
| P | -2.18843500 | -1.23187900 | 0.53540800  |
| P | 1.19822100  | -2.02281500 | -0.00645600 |
| C | -2.11510200 | -3.05791000 | 0.77964000  |
| H | -2.99550900 | -3.37546600 | 1.35591700  |
| H | -2.22225500 | -3.50366500 | -0.22049500 |
| C | -0.82085700 | -3.54790100 | 1.42994900  |
| H | -0.99042100 | -4.56212700 | 1.81560000  |
| H | -0.57032900 | -2.93427700 | 2.30961300  |
| C | 0.35764600  | -3.61345800 | 0.46151100  |
| H | 1.14587100  | -4.26738700 | 0.85979100  |
| C | 2.68928700  | -1.97998500 | 1.04162200  |
| C | 3.95008500  | -1.66935300 | 0.52688400  |
| C | 2.53140500  | -2.14384200 | 2.42136000  |
| H | 4.08220900  | -1.52205500 | -0.54412300 |
| C | 5.03851400  | -1.53296600 | 1.38216200  |
| C | 3.62006800  | -2.00095800 | 3.27380900  |
| H | 1.55157600  | -2.36727200 | 2.84482900  |
| H | 6.01831800  | -1.29585700 | 0.97196500  |
| C | 4.87489100  | -1.69391600 | 2.75529200  |
| H | 3.48628200  | -2.12863900 | 4.34615000  |
| H | 5.72664800  | -1.58054700 | 3.42294400  |
| C | 1.73044300  | -2.37686100 | -1.71102500 |
| C | 1.13821200  | -1.68612100 | -2.77175800 |
| C | 2.63506900  | -3.41050300 | -1.97915200 |
| H | 0.42667100  | -0.88420300 | -2.56307100 |
| C | 1.45435500  | -2.01719900 | -4.08609500 |

|    |             |             |             |
|----|-------------|-------------|-------------|
| C  | 2.95335200  | -3.73354700 | -3.29298900 |
| H  | 3.09585300  | -3.96563700 | -1.16168300 |
| H  | 0.98910600  | -1.47533000 | -4.90693100 |
| C  | 2.36352100  | -3.03759200 | -4.34575500 |
| H  | 3.66210500  | -4.53393900 | -3.49514900 |
| H  | 2.61339700  | -3.29420300 | -5.37338000 |
| C  | -3.49592700 | -1.04064000 | -0.72323400 |
| C  | -3.14922300 | -0.61608200 | -2.00757000 |
| C  | -4.82825600 | -1.35954900 | -0.43699900 |
| H  | -2.11790400 | -0.33957200 | -2.22854700 |
| C  | -4.12386800 | -0.51157000 | -2.99673500 |
| C  | -5.79809900 | -1.25588000 | -1.42624600 |
| H  | -5.10904800 | -1.68081600 | 0.56673200  |
| H  | -3.84819800 | -0.17229700 | -3.99348800 |
| C  | -5.44573700 | -0.83191500 | -2.70670400 |
| H  | -6.83310700 | -1.50374900 | -1.19834300 |
| H  | -6.20834300 | -0.74549900 | -3.47850700 |
| C  | -2.94993300 | -0.58512900 | 2.06769700  |
| C  | -2.97089800 | -1.31296800 | 3.26067600  |
| C  | -3.48414900 | 0.71062300  | 2.04867100  |
| H  | -2.56901100 | -2.32409900 | 3.30624000  |
| C  | -3.51657700 | -0.75646800 | 4.41483200  |
| C  | -4.03318500 | 1.25901100  | 3.20090200  |
| H  | -3.46321000 | 1.29137400  | 1.12631000  |
| H  | -3.52949400 | -1.33562700 | 5.33615700  |
| C  | -4.04783500 | 0.52814500  | 4.38697600  |
| H  | -4.45168800 | 2.26337700  | 3.17274700  |
| H  | -4.47577400 | 0.96052000  | 5.28947800  |
| H  | 0.02466400  | -4.06090900 | -0.48613200 |
| Pd | -0.07441300 | -0.15229500 | 0.11790000  |

**C<sub>b</sub><sup>Pd</sup>**

**HF = -4657.3825799 hartree**

|   |             |             |             |
|---|-------------|-------------|-------------|
| P | 1.40156200  | 0.78491100  | -0.88519000 |
| P | -2.00186600 | -0.04947600 | -0.67437600 |
| C | 0.78273200  | 1.05875700  | -2.61420400 |
| H | 1.43992400  | 1.78209800  | -3.12030600 |
| H | 0.87403000  | 0.10378800  | -3.15453300 |
| C | -0.66715100 | 1.54688000  | -2.68448300 |
| H | -0.82920200 | 1.94161500  | -3.69752200 |
| H | -0.80317200 | 2.40860800  | -2.01137900 |
| C | -1.74826200 | 0.49189700  | -2.43209800 |
| H | -2.71159400 | 0.82881200  | -2.84476900 |
| C | -2.80629900 | 1.38485600  | 0.13776100  |
| C | -2.86350200 | 1.36490300  | 1.53720400  |
| C | -3.30094700 | 2.50207900  | -0.54041400 |
| H | -2.45832800 | 0.50499400  | 2.07564900  |



|    |             |             |             |
|----|-------------|-------------|-------------|
| C  | -3.41006600 | 2.43071300  | 2.24205000  |
| C  | -3.83608300 | 3.57704300  | 0.16575200  |
| H  | -3.27144400 | 2.54581900  | -1.62882100 |
| H  | -3.45000100 | 2.39889800  | 3.32941400  |
| C  | -3.89210200 | 3.54341600  | 1.55539300  |
| H  | -4.21236300 | 4.44357600  | -0.37509300 |
| H  | -4.30885900 | 4.38544400  | 2.10489000  |
| C  | -3.37519100 | -1.24701400 | -0.91980200 |
| C  | -3.05138300 | -2.60615200 | -0.97824000 |
| C  | -4.70674800 | -0.85593500 | -1.08639500 |
| H  | -2.01166800 | -2.91411000 | -0.83725700 |
| C  | -4.03974800 | -3.55876900 | -1.20784900 |
| C  | -5.69679500 | -1.80905400 | -1.30263900 |
| H  | -4.97327500 | 0.20097200  | -1.04270500 |
| H  | -3.77677800 | -4.61415200 | -1.25377900 |
| C  | -5.36434400 | -3.16023900 | -1.36524400 |
| H  | -6.73239900 | -1.49603600 | -1.42463400 |
| H  | -6.14068200 | -3.90439500 | -1.53378800 |
| C  | 3.19820700  | 0.52074000  | -1.11105100 |
| C  | 3.74444000  | 0.00450100  | -2.28988300 |
| C  | 4.03492100  | 0.69327200  | 0.00042400  |
| H  | 3.11892100  | -0.14594600 | -3.16902300 |
| C  | 5.09640200  | -0.32555100 | -2.35663500 |
| C  | 5.38331200  | 0.36723500  | -0.06842500 |
| H  | 3.62067500  | 1.09028800  | 0.92941600  |
| H  | 5.50780200  | -0.72218100 | -3.28339500 |
| C  | 5.91820700  | -0.14640900 | -1.24901500 |
| H  | 6.02056100  | 0.51368300  | 0.80214300  |
| H  | 6.97394000  | -0.40531600 | -1.30346100 |
| C  | 1.31513700  | 2.48646300  | -0.19591700 |
| C  | 2.06906600  | 3.54407200  | -0.71633400 |
| C  | 0.42196400  | 2.73943400  | 0.84895400  |
| H  | 2.77774800  | 3.36073100  | -1.52550500 |
| C  | 1.92604900  | 4.82821500  | -0.20328200 |
| C  | 0.27006500  | 4.02738600  | 1.35697000  |
| H  | -0.17558800 | 1.91667500  | 1.24993600  |
| H  | 2.51827700  | 5.64468000  | -0.61303800 |
| C  | 1.02383100  | 5.07168700  | 0.83169800  |
| H  | -0.43916400 | 4.20971900  | 2.16349300  |
| H  | 0.91113500  | 6.07930100  | 1.22798000  |
| H  | -1.49722500 | -0.43425000 | -2.97429700 |
| Pd | 0.02829000  | -0.76186300 | 0.31066600  |
| C  | -0.43037600 | -1.76604800 | 3.23226600  |
| C  | -0.06654700 | -2.30727100 | 1.96840700  |
| C  | 1.26484600  | -2.06724500 | 1.51220400  |
| C  | 2.21786500  | -1.42770600 | 2.35024000  |

|    |             |             |            |
|----|-------------|-------------|------------|
| C  | 1.80967800  | -0.90331400 | 3.55283300 |
| C  | 0.47368400  | -1.06265300 | 3.99423400 |
| H  | -1.43708200 | -1.95289800 | 3.60559900 |
| H  | -0.67963300 | -3.08850300 | 1.52050600 |
| H  | 3.24687800  | -1.32598700 | 2.00714000 |
| H  | 2.52696400  | -0.37438300 | 4.17824600 |
| H  | 0.17626900  | -0.66472600 | 4.96268300 |
| Br | 1.93512500  | -3.19839300 | 0.08434700 |

**TS1<sub>b</sub><sup>Pd</sup>**      **HF = -4657.3741977 hartree**       $\nu^\ddagger = -147.04 \text{ icm}^{-1}$

|   |             |             |             |
|---|-------------|-------------|-------------|
| P | -1.39294900 | 0.54064600  | 1.09413900  |
| P | 2.04933400  | 0.10786600  | 0.62567100  |
| C | -0.66907700 | 0.91475500  | 2.76695500  |
| H | -1.37758800 | 1.55110100  | 3.31718400  |
| H | -0.59015600 | -0.03343400 | 3.31968500  |
| C | 0.69846000  | 1.59812300  | 2.70808100  |
| H | 0.88882500  | 2.04099500  | 3.69608500  |
| H | 0.65776600  | 2.44970500  | 2.00969400  |
| C | 1.88927000  | 0.69498600  | 2.38027200  |
| H | 2.82969300  | 1.18629900  | 2.67326000  |
| C | 2.53133700  | 1.60896300  | -0.31312700 |
| C | 2.44731400  | 1.53675900  | -1.70869900 |
| C | 2.93759500  | 2.81001300  | 0.27463800  |
| H | 2.11323800  | 0.60614300  | -2.17351500 |
| C | 2.76074800  | 2.63585500  | -2.49938900 |
| C | 3.24133200  | 3.91617200  | -0.51559800 |
| H | 3.02010000  | 2.89554800  | 1.35778200  |
| H | 2.69034500  | 2.56270100  | -3.58316700 |
| C | 3.15298800  | 3.83186600  | -1.90145800 |
| H | 3.54979900  | 4.84731900  | -0.04362300 |
| H | 3.38780200  | 4.69848400  | -2.51667200 |
| C | 3.62204700  | -0.83396400 | 0.77052100  |
| C | 3.53008900  | -2.21328100 | 0.98233800  |
| C | 4.88402200  | -0.23514600 | 0.72201500  |
| H | 2.54523900  | -2.68510900 | 1.01115300  |
| C | 4.67855700  | -2.98123300 | 1.14816700  |
| C | 6.03279000  | -1.00481000 | 0.87579200  |
| H | 4.97099400  | 0.83978100  | 0.55900900  |
| H | 4.59533300  | -4.05396200 | 1.31385600  |
| C | 5.93160300  | -2.37723000 | 1.09063100  |
| H | 7.01182400  | -0.53066100 | 0.83038700  |
| H | 6.83186200  | -2.97735000 | 1.21020400  |
| C | -3.07554100 | -0.04930500 | 1.50423700  |
| C | -3.19903300 | -1.14175500 | 2.37419500  |
| C | -4.21479500 | 0.40333800  | 0.83188700  |
| H | -2.31740800 | -1.53874900 | 2.88091200  |

|    |             |             |             |
|----|-------------|-------------|-------------|
| C  | -4.43253500 | -1.74566200 | 2.58568300  |
| C  | -5.44951000 | -0.20617900 | 1.03945900  |
| H  | -4.13849000 | 1.23644200  | 0.13303000  |
| H  | -4.51118300 | -2.58804500 | 3.27088100  |
| C  | -5.56327400 | -1.27943600 | 1.91706800  |
| H  | -6.32645700 | 0.16035700  | 0.50807100  |
| H  | -6.52851500 | -1.75608200 | 2.07738900  |
| C  | -1.62144600 | 2.23972100  | 0.44072500  |
| C  | -2.42650000 | 3.19672500  | 1.07049900  |
| C  | -0.87365400 | 2.61495600  | -0.67866900 |
| H  | -3.01349800 | 2.92397900  | 1.94852000  |
| C  | -2.49175900 | 4.49497800  | 0.57798300  |
| C  | -0.93327000 | 3.91722600  | -1.16943600 |
| H  | -0.22797400 | 1.87702300  | -1.15906800 |
| H  | -3.12489300 | 5.23030100  | 1.07143800  |
| C  | -1.74427300 | 4.85668100  | -0.54209800 |
| H  | -0.34193900 | 4.19436500  | -2.04110700 |
| H  | -1.79501500 | 5.87519100  | -0.92290400 |
| H  | 1.83334000  | -0.22897300 | 2.97824500  |
| Pd | 0.03489000  | -0.91200900 | -0.18622900 |
| C  | -1.53549600 | -0.40130800 | -3.68966900 |
| C  | -0.71435200 | -1.14416100 | -2.83837000 |
| C  | -1.27779000 | -1.72660100 | -1.69096100 |
| C  | -2.66880500 | -1.72821400 | -1.49710100 |
| C  | -3.46127800 | -0.99254200 | -2.36170800 |
| C  | -2.90188000 | -0.31433600 | -3.45298900 |
| H  | -1.09728300 | 0.08296900  | -4.56137300 |
| H  | 0.34607000  | -1.27314700 | -3.05013900 |
| H  | -3.10108900 | -2.23727800 | -0.63543100 |
| H  | -4.53437100 | -0.94016900 | -2.17983500 |
| H  | -3.54099000 | 0.24787900  | -4.13066800 |
| Br | -0.19026800 | -3.36613100 | -0.96031900 |

**1<sub>b</sub><sup>Pd</sup>**

**HF = -4657.4390619 hartree**

|   |             |            |             |
|---|-------------|------------|-------------|
| P | 1.41400100  | 0.61829100 | -0.98283300 |
| P | -1.94159400 | 0.17629900 | -0.78518000 |
| C | 0.79765100  | 1.05527900 | -2.67067100 |
| H | 1.57253500  | 1.67647400 | -3.14155900 |
| H | 0.73967100  | 0.12431800 | -3.25366700 |
| C | -0.54817700 | 1.77641300 | -2.70186900 |
| H | -0.65329300 | 2.24317900 | -3.69041600 |
| H | -0.54861300 | 2.60905400 | -1.98073500 |
| C | -1.75680500 | 0.86938100 | -2.48578000 |
| H | -2.68900900 | 1.38083800 | -2.76408600 |
| C | -2.52790700 | 1.56259100 | 0.25291100  |
| C | -2.49577700 | 1.39500300 | 1.64416900  |

|    |             |             |             |
|----|-------------|-------------|-------------|
| C  | -2.94819800 | 2.78648600  | -0.27414000 |
| H  | -2.16375900 | 0.44309000  | 2.06446700  |
| C  | -2.87482100 | 2.43259000  | 2.48749100  |
| C  | -3.31602800 | 3.82838100  | 0.57330500  |
| H  | -2.98937600 | 2.94374400  | -1.35092100 |
| H  | -2.84733800 | 2.28983700  | 3.56613700  |
| C  | -3.27830900 | 3.65416700  | 1.95272700  |
| H  | -3.63429700 | 4.77926900  | 0.15041100  |
| H  | -3.56420200 | 4.47064200  | 2.61306700  |
| C  | -3.37788200 | -0.92734100 | -1.01416400 |
| C  | -3.17753200 | -2.10817100 | -1.73867200 |
| C  | -4.63927400 | -0.64820900 | -0.48882400 |
| H  | -2.18639800 | -2.34007000 | -2.13492500 |
| C  | -4.23132500 | -2.98777700 | -1.94910400 |
| C  | -5.69217300 | -1.53711400 | -0.69330400 |
| H  | -4.80467600 | 0.26628300  | 0.08030800  |
| H  | -4.06902500 | -3.90194400 | -2.51702900 |
| C  | -5.49069800 | -2.70378700 | -1.42309700 |
| H  | -6.67426100 | -1.31349400 | -0.28065100 |
| H  | -6.31491100 | -3.39672000 | -1.58144200 |
| C  | 3.10717100  | 0.03633200  | -1.32139800 |
| C  | 3.29659300  | -0.96042500 | -2.28398600 |
| C  | 4.19951800  | 0.48866800  | -0.57812500 |
| H  | 2.44886200  | -1.34782200 | -2.85058300 |
| C  | 4.56388100  | -1.48414700 | -2.51076700 |
| C  | 5.46627200  | -0.04038600 | -0.80458400 |
| H  | 4.06207500  | 1.25411200  | 0.18493000  |
| H  | 4.70207300  | -2.25677500 | -3.26461100 |
| C  | 5.65032300  | -1.02535500 | -1.77032200 |
| H  | 6.31220400  | 0.31907300  | -0.22172000 |
| H  | 6.64197500  | -1.43797400 | -1.94578600 |
| C  | 1.57384200  | 2.24749900  | -0.17419800 |
| C  | 2.31747900  | 3.27865700  | -0.76136300 |
| C  | 0.86712800  | 2.50071500  | 1.00403200  |
| H  | 2.88040400  | 3.09895700  | -1.67774600 |
| C  | 2.34941800  | 4.53798600  | -0.17524700 |
| C  | 0.89127700  | 3.76534100  | 1.58471800  |
| H  | 0.28308600  | 1.70118800  | 1.46297400  |
| H  | 2.93160600  | 5.33352200  | -0.63589500 |
| C  | 1.63290500  | 4.78336500  | 0.99506200  |
| H  | 0.32427800  | 3.95054100  | 2.49547200  |
| H  | 1.65421200  | 5.77344200  | 1.44638900  |
| H  | -1.68482700 | -0.00665400 | -3.14842300 |
| Pd | 0.03286900  | -0.78192600 | 0.20773800  |
| C  | 3.35722800  | -1.36378700 | 2.93068800  |
| C  | 2.22948700  | -0.85803500 | 2.28054700  |

|    |             |             |             |
|----|-------------|-------------|-------------|
| C  | 1.73135000  | -1.47555900 | 1.13061100  |
| C  | 2.38714800  | -2.60981600 | 0.64369600  |
| C  | 3.51079900  | -3.11933900 | 1.29332000  |
| C  | 4.00192900  | -2.49475000 | 2.43832200  |
| H  | 3.73164300  | -0.86775400 | 3.82638900  |
| H  | 1.73869000  | 0.03075500  | 2.68436400  |
| H  | 2.02137400  | -3.10749700 | -0.25774500 |
| H  | 4.00695200  | -4.00670400 | 0.89945400  |
| H  | 4.88234600  | -2.88891900 | 2.94390400  |
| Br | -1.29048600 | -2.33415400 | 1.62548600  |

**Ni'(bpy)Br** HF = -3237.6740201 hartree

|    |             |             |             |
|----|-------------|-------------|-------------|
| C  | -1.76304100 | 0.77726900  | 0.00002900  |
| C  | -2.89107200 | 1.59074900  | 0.00057400  |
| C  | -2.72731300 | 2.96999500  | 0.00048400  |
| C  | -1.44364500 | 3.50170800  | -0.00012300 |
| C  | -0.36686300 | 2.62602200  | -0.00053400 |
| N  | -0.51858900 | 1.29853200  | -0.00045100 |
| H  | -3.59807900 | 3.62095100  | 0.00088900  |
| H  | -3.88779900 | 1.15876500  | 0.00118000  |
| H  | -1.27393500 | 4.57440100  | -0.00022400 |
| H  | 0.66097400  | 2.98612300  | -0.00093000 |
| C  | -1.80955100 | -0.69678000 | -0.00000200 |
| C  | -2.98546100 | -1.43918000 | -0.00055100 |
| C  | -0.53097900 | -2.63011400 | 0.00051200  |
| C  | -2.90763700 | -2.82596100 | -0.00049900 |
| H  | -3.95511300 | -0.94878800 | -0.00113000 |
| H  | 0.47305600  | -3.05212700 | 0.00093400  |
| H  | -3.81588500 | -3.42338800 | -0.00091700 |
| C  | -1.65960200 | -3.43711200 | 0.00007800  |
| H  | -1.55533200 | -4.51810100 | 0.00014000  |
| N  | -0.60059700 | -1.29555300 | 0.00046000  |
| Ni | 0.95428300  | -0.05218300 | 0.00001000  |
| Br | 3.21649900  | -0.04506100 | -0.00000200 |

**C<sub>a</sub><sup>Ni</sup>** HF = -4544.8152299 hartree

|   |            |             |             |
|---|------------|-------------|-------------|
| C | 2.66503900 | -1.68200700 | -0.80634500 |
| C | 3.24849400 | -2.92340700 | -0.57584900 |
| C | 4.45294100 | -2.98623300 | 0.11337500  |
| C | 5.04957500 | -1.80858100 | 0.54605100  |
| C | 4.40431500 | -0.60861300 | 0.28320600  |
| N | 3.23883400 | -0.54264200 | -0.36707300 |
| H | 4.92106900 | -3.94840200 | 0.30621700  |
| H | 2.76933900 | -3.83548100 | -0.92103000 |
| H | 5.99411600 | -1.81298600 | 1.08229500  |
| H | 4.82606800 | 0.34414600  | 0.60269500  |

|    |             |             |             |
|----|-------------|-------------|-------------|
| C  | 1.38435800  | -1.49463400 | -1.51602300 |
| C  | 0.65600500  | -2.52871400 | -2.09628300 |
| C  | -0.22116700 | 0.05405700  | -2.13740500 |
| C  | -0.55701700 | -2.23717100 | -2.70762700 |
| H  | 1.02195100  | -3.55156200 | -2.07163400 |
| H  | -0.52677300 | 1.10082000  | -2.11998700 |
| H  | -1.14269300 | -3.03261400 | -3.16197600 |
| C  | -1.01300700 | -0.92437800 | -2.72387600 |
| H  | -1.96686600 | -0.65800700 | -3.17103000 |
| N  | 0.94954500  | -0.21985700 | -1.55680700 |
| Ni | 2.15759600  | 1.10282800  | -0.65360600 |
| C  | -0.81615400 | 0.81397400  | 1.37304400  |
| C  | 0.42092500  | 0.61650900  | 1.98094900  |
| C  | 0.95044100  | -0.67439400 | 2.06810300  |
| C  | 0.22860600  | -1.76513300 | 1.56710400  |
| C  | -0.99982800 | -1.57047300 | 0.95999900  |
| C  | -1.49717700 | -0.27649500 | 0.86545500  |
| H  | -1.23433700 | 1.81341100  | 1.26936100  |
| H  | 0.96102200  | 1.47467600  | 2.37018400  |
| H  | 0.66207900  | -2.76024600 | 1.64971300  |
| H  | -1.56215400 | -2.40211000 | 0.54094600  |
| O  | 2.15698900  | -0.96605400 | 2.60138400  |
| Br | 2.08464900  | 3.36551600  | -0.50804000 |
| C  | 2.89490800  | 0.09140900  | 3.18383600  |
| H  | 2.34914100  | 0.53965300  | 4.02556700  |
| H  | 3.82642500  | -0.34964500 | 3.54628400  |
| H  | 3.12895700  | 0.87293700  | 2.44506000  |
| O  | -2.69653000 | -0.05512100 | 0.14844000  |
| S  | -4.06291500 | -0.18901900 | 0.98803000  |
| O  | -4.17871000 | 0.88212800  | 1.95441300  |
| O  | -4.29589100 | -1.56414500 | 1.37521600  |
| C  | -5.15379700 | 0.20015700  | -0.45159500 |
| F  | -4.94198900 | -0.67329800 | -1.41332800 |
| F  | -4.90231200 | 1.41941100  | -0.87703900 |
| F  | -6.39862900 | 0.11447200  | -0.02563100 |

**C<sub>iso</sub><sup>Ni</sup>**

**HF = -4544.8179248 hartree**

|   |             |             |             |
|---|-------------|-------------|-------------|
| C | -2.41820900 | -0.40663700 | -1.31661400 |
| C | -3.71371100 | 0.09973500  | -1.36389500 |
| C | -4.66870000 | -0.41399900 | -0.49607100 |
| C | -4.30676200 | -1.41614200 | 0.39747100  |
| C | -2.99097000 | -1.86002200 | 0.39308600  |
| N | -2.07038600 | -1.36933000 | -0.44013300 |
| H | -5.68653200 | -0.03146600 | -0.51654600 |
| H | -3.97657500 | 0.89321600  | -2.05824800 |
| H | -5.02478900 | -1.84472100 | 1.09133000  |

|    |             |             |             |
|----|-------------|-------------|-------------|
| H  | -2.64693300 | -2.63339800 | 1.07983200  |
| C  | -1.31708800 | 0.06493700  | -2.17838400 |
| C  | -1.46825300 | 1.02870200  | -3.17041500 |
| C  | 0.94860700  | -0.11364200 | -2.62835600 |
| C  | -0.35542600 | 1.42693300  | -3.89933500 |
| H  | -2.43990500 | 1.47244000  | -3.37032400 |
| H  | 1.88946600  | -0.59954300 | -2.37276200 |
| H  | -0.45392800 | 2.18330500  | -4.67409500 |
| C  | 0.87918500  | 0.85055500  | -3.62316600 |
| H  | 1.77544100  | 1.13724000  | -4.16590400 |
| N  | -0.11877900 | -0.49987300 | -1.92250400 |
| Ni | -0.10237600 | -1.78028400 | -0.41051800 |
| C  | -1.74450600 | 2.74760200  | 0.31768100  |
| C  | -0.44733700 | 2.37304800  | 0.01413900  |
| C  | 0.13071400  | 1.33501700  | 0.73189200  |
| C  | -0.53976500 | 0.67426300  | 1.74534200  |
| C  | -1.84012200 | 1.06032200  | 2.05876400  |
| C  | -2.44930500 | 2.08989300  | 1.33597000  |
| H  | -2.24207700 | 3.54743300  | -0.22668900 |
| H  | 0.11421300  | 2.86024900  | -0.78111800 |
| H  | -0.05847800 | -0.14753000 | 2.27269400  |
| H  | -2.37155200 | 0.53482700  | 2.84714000  |
| O  | -3.71393800 | 2.51661300  | 1.54094600  |
| C  | -4.48269400 | 1.85744400  | 2.52957900  |
| H  | -4.59995100 | 0.78879700  | 2.29472600  |
| H  | -4.02990700 | 1.96420700  | 3.52492200  |
| H  | -5.46305900 | 2.33824400  | 2.52501900  |
| O  | 1.40302500  | 0.87349000  | 0.32580600  |
| S  | 2.67696100  | 1.38494800  | 1.15950100  |
| O  | 2.82047300  | 0.63736900  | 2.39067500  |
| O  | 2.75100900  | 2.83011400  | 1.15398200  |
| C  | 3.89996300  | 0.72429900  | -0.05850600 |
| F  | 3.70150900  | 1.28440600  | -1.23412100 |
| F  | 3.76603800  | -0.58416100 | -0.15143300 |
| F  | 5.10087300  | 1.02592700  | 0.39224800  |
| Br | 0.93370900  | -3.28057700 | 0.94069700  |

|                                     |                                   |            |                                           |
|-------------------------------------|-----------------------------------|------------|-------------------------------------------|
| <b>TS1<sub>a</sub><sup>Ni</sup></b> | <b>HF = -4544.7708273 hartree</b> |            | $\nu^\ddagger = -417.39 \text{ icm}^{-1}$ |
| C                                   | 2.59619400                        | 1.74868100 | 0.06188600                                |
| C                                   | 3.96421300                        | 1.95798700 | -0.08141100                               |
| C                                   | 4.84443400                        | 1.18676500 | 0.66739800                                |
| C                                   | 4.34290700                        | 0.22635500 | 1.53675800                                |
| C                                   | 2.96548200                        | 0.07772400 | 1.62960800                                |
| N                                   | 2.12106200                        | 0.82199800 | 0.91556700                                |
| H                                   | 5.91673900                        | 1.33449000 | 0.56629200                                |
| H                                   | 4.34679000                        | 2.70408700 | -0.77171200                               |

|    |             |             |             |
|----|-------------|-------------|-------------|
| H  | 5.00087900  | -0.39875700 | 2.13312100  |
| H  | 2.50889700  | -0.65839200 | 2.29093600  |
| C  | 1.56765900  | 2.48253000  | -0.70543200 |
| C  | 1.86019900  | 3.51354600  | -1.59227700 |
| C  | -0.69989500 | 2.66057600  | -1.17723300 |
| C  | 0.82276800  | 4.12248100  | -2.28667500 |
| H  | 2.88352800  | 3.84494000  | -1.74268500 |
| H  | -1.69852500 | 2.27285400  | -0.98385800 |
| H  | 1.03534200  | 4.92825000  | -2.98479600 |
| C  | -0.48132500 | 3.69140900  | -2.08008900 |
| H  | -1.31872800 | 4.14157900  | -2.60470400 |
| N  | 0.29713200  | 2.07189600  | -0.51137800 |
| Ni | 0.09927500  | 0.56481900  | 0.82690300  |
| C  | 1.77607800  | -1.54494400 | -2.16711100 |
| C  | 0.76853500  | -0.69261600 | -1.76090400 |
| C  | 0.15824400  | -0.95695800 | -0.53415400 |
| C  | 0.32716100  | -2.15493000 | 0.14886400  |
| C  | 1.34947600  | -3.00462400 | -0.27396000 |
| C  | 2.08853300  | -2.69372800 | -1.41858900 |
| H  | 2.33598300  | -1.35100200 | -3.07981900 |
| H  | 0.50465600  | 0.18458100  | -2.34596600 |
| H  | -0.26478700 | -2.39046400 | 1.02886800  |
| H  | 1.54538700  | -3.90799100 | 0.29727600  |
| O  | 3.09410000  | -3.44795400 | -1.90738200 |
| C  | 3.44349300  | -4.62617900 | -1.20573300 |
| H  | 3.76133900  | -4.39781800 | -0.17909400 |
| H  | 2.60704800  | -5.33769800 | -1.17888300 |
| H  | 4.27790800  | -5.07071800 | -1.75179100 |
| O  | -1.55733100 | -0.24397800 | -0.53227500 |
| S  | -2.76813400 | -1.18844500 | -0.62531600 |
| O  | -2.87748600 | -2.11519400 | 0.49148900  |
| O  | -2.95254400 | -1.70525100 | -1.97376700 |
| C  | -4.07738100 | 0.08371400  | -0.36368100 |
| F  | -4.02938100 | 0.98460600  | -1.33344400 |
| F  | -3.89239800 | 0.68611400  | 0.80022400  |
| F  | -5.25935000 | -0.50869800 | -0.37173200 |
| Br | -0.61667900 | 0.00626000  | 2.98473500  |

**1<sub>a</sub><sup>Ni</sup> HF = -4544.798107 hartree**

|   |             |             |             |
|---|-------------|-------------|-------------|
| C | -3.12230700 | -1.09855600 | -0.14889800 |
| C | -4.51042400 | -1.04938300 | -0.08862500 |
| C | -5.12026800 | -0.56820900 | 1.06266900  |
| C | -4.33241600 | -0.15790800 | 2.12956700  |
| C | -2.95330500 | -0.23587000 | 2.00185600  |
| N | -2.36788300 | -0.69121900 | 0.89162400  |
| H | -6.20436600 | -0.51894000 | 1.12333100  |



|    |             |             |             |
|----|-------------|-------------|-------------|
| H  | -5.11538700 | -1.38237500 | -0.92657500 |
| H  | -4.76977100 | 0.21848100  | 3.04937700  |
| H  | -2.27728800 | 0.05331300  | 2.80541900  |
| C  | -2.37630400 | -1.60257400 | -1.31772400 |
| C  | -2.98671200 | -2.05277300 | -2.48320500 |
| C  | -0.27085300 | -2.06687000 | -2.18113800 |
| C  | -2.19185100 | -2.52392900 | -3.52010300 |
| H  | -4.06702200 | -2.03770500 | -2.58952400 |
| H  | 0.80223800  | -2.02731800 | -2.00919900 |
| H  | -2.65120800 | -2.87694500 | -4.43989400 |
| C  | -0.81150800 | -2.53907500 | -3.36841200 |
| H  | -0.15710700 | -2.90338000 | -4.15451600 |
| N  | -1.03666200 | -1.60789900 | -1.18698600 |
| Ni | -0.34929700 | -0.77376700 | 0.56059600  |
| C  | -0.41360200 | 2.66702900  | -1.90711900 |
| C  | -0.48583000 | 1.34708700  | -1.47902400 |
| C  | -0.51853800 | 1.12879800  | -0.11347600 |
| C  | -0.58213000 | 2.13102200  | 0.83030500  |
| C  | -0.51426400 | 3.45148900  | 0.38092500  |
| C  | -0.42707200 | 3.72064300  | -0.98707700 |
| H  | -0.35301900 | 2.89863500  | -2.96875900 |
| H  | -0.46755000 | 0.54803300  | -2.21327100 |
| H  | -0.63451000 | 1.92055900  | 1.89471600  |
| H  | -0.53124500 | 4.25133800  | 1.11644300  |
| O  | -0.36058500 | 4.96039900  | -1.51732000 |
| C  | -0.37680600 | 6.06308800  | -0.63116100 |
| H  | -1.29852600 | 6.08245300  | -0.03363800 |
| H  | 0.49220500  | 6.04729700  | 0.04092000  |
| H  | -0.33402800 | 6.95771900  | -1.25561800 |
| O  | 1.56023300  | -1.02209000 | -0.09979700 |
| S  | 2.63093600  | -0.06990300 | -0.55237600 |
| O  | 2.65997800  | 1.21125600  | 0.14817000  |
| O  | 2.77433900  | -0.03771500 | -2.00814800 |
| C  | 4.12270600  | -0.95885200 | 0.05231000  |
| F  | 4.17177300  | -2.18254300 | -0.45732200 |
| F  | 4.09674200  | -1.04442500 | 1.37569500  |
| F  | 5.21299800  | -0.29608500 | -0.31383300 |
| Br | 0.34020900  | -0.61347700 | 2.82158600  |

**C<sub>6</sub>Ni** HF = -6040.7083756 hartree

|   |             |             |             |
|---|-------------|-------------|-------------|
| C | -1.59746100 | -1.19108600 | -0.89464200 |
| C | -2.77743000 | -1.91604000 | -0.75483400 |
| C | -2.72931200 | -3.17148700 | -0.16290300 |
| C | -1.50890700 | -3.66843000 | 0.27878200  |
| C | -0.37595700 | -2.88549900 | 0.10368600  |
| N | -0.41588700 | -1.68228200 | -0.47290600 |

|    |             |             |             |
|----|-------------|-------------|-------------|
| H  | -3.63993600 | -3.75429300 | -0.04763200 |
| H  | -3.72407700 | -1.51276300 | -1.10492900 |
| H  | -1.42965400 | -4.64420100 | 0.74955900  |
| H  | 0.60686400  | -3.22212200 | 0.43348900  |
| C  | -1.52300600 | 0.15430200  | -1.49604400 |
| C  | -2.63454600 | 0.86605900  | -1.93781100 |
| C  | -0.11209900 | 1.89032800  | -2.09859500 |
| C  | -2.45571600 | 2.13499200  | -2.47124700 |
| H  | -3.63250600 | 0.44457500  | -1.85165800 |
| H  | 0.91394100  | 2.25239100  | -2.14250000 |
| H  | -3.31329700 | 2.70916300  | -2.81328500 |
| C  | -1.17108800 | 2.66009000  | -2.55625000 |
| H  | -0.98813600 | 3.64801200  | -2.96904400 |
| N  | -0.27923000 | 0.66881500  | -1.58022500 |
| Ni | 1.14295800  | -0.44614900 | -0.76190300 |
| C  | -2.80163600 | 0.94275200  | 1.76211500  |
| C  | -1.67146000 | 1.67413100  | 1.40722200  |
| C  | -0.41962100 | 1.16652800  | 1.72910400  |
| C  | -0.26667400 | -0.03699500 | 2.40620800  |
| C  | -1.40698100 | -0.75210200 | 2.76138300  |
| C  | -2.67180400 | -0.26856300 | 2.43615300  |
| H  | -3.78771300 | 1.32445600  | 1.50284400  |
| H  | -1.76206500 | 2.61901300  | 0.87453500  |
| H  | 0.72677000  | -0.42361000 | 2.62822100  |
| H  | -1.30054900 | -1.70240300 | 3.28198000  |
| H  | -3.55788000 | -0.84021300 | 2.70527900  |
| Br | 1.12614000  | 2.14118700  | 1.20809200  |
| Br | 3.28795700  | -1.08134200 | -0.31139600 |

|                                     |                                   |             |                                           |
|-------------------------------------|-----------------------------------|-------------|-------------------------------------------|
| <b>TS1<sub>b</sub><sup>Ni</sup></b> | <b>HF = -6040.6876734 hartree</b> |             | $\nu^\ddagger = -175.37 \text{ icm}^{-1}$ |
| C                                   | 2.24600500                        | 0.65596600  | -0.45429900                               |
| C                                   | 3.35789700                        | 1.49262400  | -0.40736600                               |
| C                                   | 3.17638500                        | 2.86194400  | -0.55154600                               |
| C                                   | 1.89444200                        | 3.36340700  | -0.73892000                               |
| C                                   | 0.83573800                        | 2.46638700  | -0.77793100                               |
| N                                   | 1.00946800                        | 1.15187800  | -0.64100600                               |
| H                                   | 4.03258000                        | 3.53089800  | -0.51316900                               |
| H                                   | 4.35385200                        | 1.08928500  | -0.24901300                               |
| H                                   | 1.71204800                        | 4.42803700  | -0.85231600                               |
| H                                   | -0.19269200                       | 2.79601900  | -0.92330400                               |
| C                                   | 2.31935500                        | -0.81096700 | -0.29290600                               |
| C                                   | 3.51836400                        | -1.51410200 | -0.21801700                               |
| C                                   | 1.10309200                        | -2.76953200 | -0.05987200                               |
| C                                   | 3.48388100                        | -2.89334200 | -0.05982700                               |
| H                                   | 4.47196400                        | -0.99900200 | -0.29054200                               |
| H                                   | 0.11267000                        | -3.21706800 | 0.00906200                                |

|    |             |             |             |
|----|-------------|-------------|-------------|
| H  | 4.41116700  | -3.45806600 | -0.00293500 |
| C  | 2.25623400  | -3.53711700 | 0.02261500  |
| H  | 2.18561100  | -4.61362200 | 0.14755700  |
| N  | 1.13176100  | -1.44395600 | -0.21591800 |
| Ni | -0.52252600 | -0.20879600 | -0.46720700 |
| C  | 0.30862300  | 0.88290000  | 3.34278800  |
| C  | 0.02282200  | -0.07470600 | 2.37575900  |
| C  | -0.95716000 | 0.21807400  | 1.42862800  |
| C  | -1.74482400 | 1.36486500  | 1.50915000  |
| C  | -1.43742900 | 2.31164300  | 2.48438800  |
| C  | -0.40969200 | 2.07818600  | 3.39417500  |
| H  | 1.09788100  | 0.68839900  | 4.06729400  |
| H  | 0.57810400  | -1.00929600 | 2.33579100  |
| H  | -2.55016800 | 1.53399300  | 0.79634100  |
| H  | -2.01743500 | 3.23162800  | 2.53556600  |
| H  | -0.18106700 | 2.81703700  | 4.15933300  |
| Br | -2.10403400 | -1.59953000 | 0.65058500  |
| Br | -1.84496000 | 0.58510800  | -2.31116600 |

**1<sub>b</sub><sup>Ni</sup> HF = -6040.7003749 hartree**

|    |             |             |             |
|----|-------------|-------------|-------------|
| C  | -1.99795000 | -1.05918400 | 0.01904600  |
| C  | -3.05522600 | -1.93522900 | -0.20454800 |
| C  | -3.08872000 | -2.66794100 | -1.38266500 |
| C  | -2.07014100 | -2.50906800 | -2.31475100 |
| C  | -1.04404300 | -1.62267500 | -2.02571700 |
| N  | -1.01382100 | -0.92705800 | -0.88939200 |
| H  | -3.90745000 | -3.35746100 | -1.57112800 |
| H  | -3.84637800 | -2.04502300 | 0.53170600  |
| H  | -2.06401900 | -3.05994200 | -3.25023100 |
| H  | -0.22070300 | -1.45440000 | -2.71825700 |
| C  | -1.87099600 | -0.20987100 | 1.21623300  |
| C  | -2.79623100 | -0.18029800 | 2.25463100  |
| C  | -0.56678400 | 1.40530200  | 2.25879100  |
| C  | -2.57761900 | 0.68178400  | 3.32139400  |
| H  | -3.67756800 | -0.81487600 | 2.23491900  |
| H  | 0.34274500  | 2.00254900  | 2.20207800  |
| H  | -3.28860600 | 0.72081500  | 4.14271700  |
| C  | -1.44839400 | 1.49129800  | 3.32780100  |
| H  | -1.24755700 | 2.17915700  | 4.14363300  |
| N  | -0.77814500 | 0.57305300  | 1.23980900  |
| Ni | 0.38961400  | 0.39353500  | -0.41713800 |
| C  | 2.15463600  | -2.71960200 | 1.83388900  |
| C  | 1.44891500  | -1.55414400 | 1.52613100  |
| C  | 1.45705500  | -1.10172200 | 0.21708500  |
| C  | 2.17254900  | -1.75212400 | -0.77865400 |
| C  | 2.87001100  | -2.91749800 | -0.45854000 |

|    |             |             |             |
|----|-------------|-------------|-------------|
| C  | 2.85954500  | -3.40115200 | 0.84689200  |
| H  | 2.15074800  | -3.08881900 | 2.85853700  |
| H  | 0.90979100  | -1.02479500 | 2.31028400  |
| H  | 2.19809500  | -1.36193600 | -1.79841900 |
| H  | 3.42710200  | -3.43887600 | -1.23553900 |
| H  | 3.40870100  | -4.30702700 | 1.09662200  |
| Br | 2.27298200  | 1.66331600  | 0.05101800  |
| Br | -0.76526700 | 2.07446700  | -1.69850600 |

**Ni<sup>0</sup>(bpy)**

**HF = -665.9916144 hartree**

|    |             |             |             |
|----|-------------|-------------|-------------|
| C  | 0.71332900  | 0.72170100  | -0.00001100 |
| C  | 1.51279900  | 1.89335900  | -0.00020300 |
| C  | 2.88047500  | 1.80501500  | -0.00003700 |
| C  | 3.49681000  | 0.52943500  | 0.00030700  |
| C  | 2.67846300  | -0.57835600 | 0.00036400  |
| N  | 1.33458800  | -0.52113100 | 0.00019100  |
| H  | 3.48628500  | 2.70941000  | -0.00013600 |
| H  | 1.03538400  | 2.87121000  | -0.00050300 |
| H  | 4.57719600  | 0.41516800  | 0.00047700  |
| H  | 3.10220300  | -1.58343000 | 0.00057800  |
| C  | -0.71311500 | 0.72182500  | 0.00001800  |
| C  | -1.51248300 | 1.89354000  | -0.00029600 |
| C  | -2.67840000 | -0.57807400 | 0.00049100  |
| C  | -2.88016800 | 1.80532200  | -0.00016100 |
| H  | -1.03498100 | 2.87135200  | -0.00063200 |
| H  | -3.10220300 | -1.58312100 | 0.00084200  |
| H  | -3.48590100 | 2.70976500  | -0.00040600 |
| C  | -3.49663200 | 0.52978800  | 0.00028400  |
| H  | -4.57703000 | 0.41562000  | 0.00050000  |
| N  | -1.33450200 | -0.52093900 | 0.00034600  |
| Ni | -0.00028700 | -1.92831500 | -0.00032200 |

**C<sub>a</sub><sup>Ni(0)</sup>**

**HF = -1973.1633468 hartree**

|   |             |             |             |
|---|-------------|-------------|-------------|
| C | -2.28556800 | -1.80797600 | 0.85304000  |
| C | -2.84851000 | -2.71225600 | 1.74743700  |
| C | -2.21812000 | -2.94092900 | 2.96397600  |
| C | -1.04663800 | -2.25516100 | 3.25549900  |
| C | -0.54127200 | -1.37226800 | 2.31009800  |
| N | -1.13556700 | -1.15308400 | 1.13203900  |
| H | -2.64464900 | -3.64222700 | 3.67703400  |
| H | -3.77715200 | -3.22384700 | 1.50936000  |
| H | -0.52494400 | -2.39784000 | 4.19765300  |
| H | 0.38185300  | -0.82386500 | 2.48382800  |
| C | -2.89656400 | -1.45718100 | -0.44338400 |
| C | -3.99980400 | -2.11047800 | -0.98295600 |
| C | -2.79568000 | -0.02126800 | -2.25775900 |

|    |             |             |             |
|----|-------------|-------------|-------------|
| C  | -4.50384200 | -1.68669900 | -2.20599600 |
| H  | -4.45992100 | -2.94700900 | -0.46401900 |
| H  | -2.28228800 | 0.81782800  | -2.72525900 |
| H  | -5.36374200 | -2.18669000 | -2.64499300 |
| C  | -3.89559500 | -0.62040300 | -2.85658000 |
| H  | -4.26058600 | -0.25500500 | -3.81227900 |
| N  | -2.30166500 | -0.42657600 | -1.08324300 |
| Ni | -0.62606100 | 0.20256200  | -0.23757300 |
| C  | 1.04791100  | 2.05547900  | 1.14774500  |
| C  | 0.26005300  | 3.16018000  | 1.29929300  |
| C  | -0.58255900 | 3.59808100  | 0.22738800  |
| C  | -0.59492400 | 2.92776400  | -0.96722700 |
| C  | 0.13580900  | 1.70166200  | -1.15028900 |
| C  | 0.94688000  | 1.24234700  | -0.02939600 |
| H  | 1.75725700  | 1.76366700  | 1.92274500  |
| H  | 0.31151600  | 3.72600600  | 2.22590000  |
| H  | -1.15502600 | 3.35676300  | -1.79850600 |
| H  | 0.44006800  | 1.43734300  | -2.16893700 |
| O  | -1.35628300 | 4.72405700  | 0.31159500  |
| C  | -1.27297500 | 5.50659200  | 1.47969000  |
| H  | -0.25367900 | 5.88417100  | 1.64913800  |
| H  | -1.94385500 | 6.35651800  | 1.32919900  |
| H  | -1.60026000 | 4.95089800  | 2.37093200  |
| O  | 2.24978300  | 0.64623800  | -0.41171400 |
| S  | 2.44328300  | -0.90162700 | -0.16052600 |
| O  | 1.72385300  | -1.72285000 | -1.11842400 |
| O  | 2.40547400  | -1.23002300 | 1.25358100  |
| C  | 4.21386300  | -0.93639200 | -0.67599600 |
| F  | 4.93061500  | -0.15703600 | 0.10935900  |
| F  | 4.32621000  | -0.54185600 | -1.92928100 |
| F  | 4.62715300  | -2.18674800 | -0.56237700 |

**TS1<sub>a</sub><sup>Ni(0)</sup>**      **HF = -1973.1561724 hartree**       $v^\ddagger = -314.68 \text{ icm}^{-1}$

|   |             |             |             |
|---|-------------|-------------|-------------|
| C | -2.95516400 | -1.18373500 | 0.55813200  |
| C | -3.79328800 | -2.13423300 | 1.13027300  |
| C | -3.29388100 | -2.95779600 | 2.13185400  |
| C | -1.97340400 | -2.81155800 | 2.53792000  |
| C | -1.19645400 | -1.83940900 | 1.92266200  |
| N | -1.67210700 | -1.04574700 | 0.95851400  |
| H | -3.93433000 | -3.70745500 | 2.58985100  |
| H | -4.82442900 | -2.23664900 | 0.80353600  |
| H | -1.54619300 | -3.43647100 | 3.31672500  |
| H | -0.15411500 | -1.68007800 | 2.19851600  |
| C | -3.36355700 | -0.25071200 | -0.51025800 |
| C | -4.63305200 | -0.21894800 | -1.07573300 |
| C | -2.65819400 | 1.49021100  | -1.87095700 |

|    |             |             |             |
|----|-------------|-------------|-------------|
| C  | -4.90340700 | 0.70924700  | -2.07403100 |
| H  | -5.40671500 | -0.90713400 | -0.74667500 |
| H  | -1.83682500 | 2.14920200  | -2.14836900 |
| H  | -5.89054600 | 0.74859000  | -2.52786100 |
| C  | -3.90211500 | 1.58149500  | -2.48086600 |
| H  | -4.07445300 | 2.32217800  | -3.25625300 |
| N  | -2.39151200 | 0.59852000  | -0.91221400 |
| Ni | -0.67537800 | 0.35157400  | 0.01911000  |
| C  | 1.23115900  | 1.44233100  | 1.80506900  |
| C  | 1.28639400  | 2.81290600  | 1.74789800  |
| C  | 1.20815000  | 3.49637700  | 0.50306300  |
| C  | 1.06084000  | 2.78726000  | -0.66531500 |
| C  | 0.89513100  | 1.36943300  | -0.64706300 |
| C  | 0.98195800  | 0.69784200  | 0.62383300  |
| H  | 1.33823600  | 0.91971400  | 2.75505000  |
| H  | 1.39832700  | 3.37059100  | 2.67471500  |
| H  | 1.10889200  | 3.32271600  | -1.61329300 |
| H  | 1.07131800  | 0.82504900  | -1.57748400 |
| O  | 1.31589500  | 4.85331200  | 0.39059000  |
| C  | 1.56462800  | 5.60087600  | 1.55901600  |
| H  | 2.50332100  | 5.29756500  | 2.04576200  |
| H  | 1.64903900  | 6.64422900  | 1.24458500  |
| H  | 0.74171200  | 5.51434200  | 2.28368000  |
| O  | 2.04463900  | -0.70766000 | 0.79901700  |
| S  | 2.00004800  | -1.89388200 | -0.16189800 |
| O  | 0.95588600  | -1.79850400 | -1.17622500 |
| O  | 2.16258700  | -3.15527100 | 0.54923000  |
| C  | 3.57039200  | -1.64384300 | -1.08523900 |
| F  | 4.59980000  | -1.68097100 | -0.25475500 |
| F  | 3.54581200  | -0.46889400 | -1.69785900 |
| F  | 3.70139300  | -2.60338500 | -1.98891100 |

**1<sub>a</sub><sup>Ni(0)</sup>**

**HF = -1973.2254065 hartree**

|   |             |             |             |
|---|-------------|-------------|-------------|
| C | -3.03621300 | 1.62228300  | 0.10640500  |
| C | -3.87238500 | 2.70591600  | 0.34036300  |
| C | -3.32871600 | 3.97946700  | 0.43790800  |
| C | -1.95906200 | 4.13490300  | 0.28794000  |
| C | -1.17776800 | 3.01081600  | 0.06540300  |
| N | -1.69117500 | 1.77464700  | -0.01224100 |
| H | -3.97152300 | 4.83680700  | 0.61980800  |
| H | -4.94395900 | 2.55988900  | 0.43807800  |
| H | -1.48689300 | 5.11120500  | 0.34180000  |
| H | -0.10118400 | 3.08775300  | -0.04893000 |
| C | -3.52326300 | 0.24779100  | -0.06814700 |
| C | -4.85688200 | -0.13193300 | 0.02605700  |
| C | -2.88077100 | -1.91805500 | -0.58273300 |

|    |             |             |             |
|----|-------------|-------------|-------------|
| C  | -5.19214200 | -1.46127300 | -0.19807100 |
| H  | -5.62870600 | 0.59234600  | 0.26930000  |
| H  | -2.05761600 | -2.58707400 | -0.82495300 |
| H  | -6.22923900 | -1.77972600 | -0.12941400 |
| C  | -4.19141900 | -2.37044800 | -0.51328400 |
| H  | -4.41384800 | -3.41643200 | -0.70211800 |
| N  | -2.55392500 | -0.64243700 | -0.36108300 |
| Ni | -0.72876600 | 0.14958800  | -0.29859500 |
| C  | 1.83441000  | 0.98119800  | -1.24040100 |
| C  | 3.11920700  | 1.52474200  | -1.14468400 |
| C  | 3.56594900  | 2.01328500  | 0.08257500  |
| C  | 2.72191800  | 1.96029500  | 1.19564900  |
| C  | 1.44505400  | 1.42712700  | 1.07613400  |
| C  | 0.97457700  | 0.92765600  | -0.14538000 |
| H  | 1.51426600  | 0.58181800  | -2.20516700 |
| H  | 3.75646200  | 1.55350700  | -2.02596800 |
| H  | 3.09021200  | 2.34532700  | 2.14618700  |
| H  | 0.80133900  | 1.40776000  | 1.95924800  |
| O  | 4.79670500  | 2.55630800  | 0.29645300  |
| C  | 5.67812800  | 2.62689900  | -0.80119900 |
| H  | 5.26735300  | 3.24736200  | -1.61121600 |
| H  | 6.59845700  | 3.08551800  | -0.43107100 |
| H  | 5.90893300  | 1.62823100  | -1.20009500 |
| O  | 0.18537100  | -2.13680600 | 1.68486600  |
| S  | 0.51364700  | -2.53105400 | 0.31638400  |
| O  | 0.08140700  | -1.53149100 | -0.73017400 |
| O  | 0.18601700  | -3.89369400 | -0.09715800 |
| C  | 2.35455000  | -2.46962300 | 0.21641400  |
| F  | 2.85009300  | -3.49573000 | 0.89846700  |
| F  | 2.82658700  | -1.34902600 | 0.73224600  |
| F  | 2.74017800  | -2.56548700 | -1.04863500 |

**C<sub>b</sub><sup>Ni(0)</sup>**

**HF = -3469.0602565 hartree**

|    |             |             |             |
|----|-------------|-------------|-------------|
| C  | 2.56056100  | -1.23584000 | 2.27790300  |
| C  | 2.49475300  | -0.15324400 | 1.44445500  |
| C  | 2.00064700  | -0.30466800 | 0.10467400  |
| C  | 1.65304300  | -1.63512400 | -0.38038400 |
| C  | 1.83770800  | -2.73831400 | 0.52106600  |
| C  | 2.24196000  | -2.54628300 | 1.81352500  |
| H  | 2.88630100  | -1.09774800 | 3.30856700  |
| H  | 2.78904300  | 0.83769300  | 1.79238700  |
| H  | 1.69415600  | -1.85247500 | -1.45254800 |
| H  | 1.67756300  | -3.74984800 | 0.14424200  |
| H  | 2.36384800  | -3.39534500 | 2.48438400  |
| Br | 2.76328100  | 1.00083300  | -1.19824900 |
| C  | -2.14606700 | 1.15823900  | 0.23023500  |

|    |             |             |             |
|----|-------------|-------------|-------------|
| C  | -2.97326000 | 2.23802600  | 0.52235300  |
| C  | -2.39894800 | 3.47010800  | 0.80891300  |
| C  | -1.01518500 | 3.59440500  | 0.78964800  |
| C  | -0.25473700 | 2.47312400  | 0.48732500  |
| N  | -0.80060200 | 1.28266900  | 0.21984200  |
| H  | -3.02955200 | 4.32480200  | 1.04132600  |
| H  | -4.05409400 | 2.12649500  | 0.52793300  |
| H  | -0.52714500 | 4.54123700  | 1.00280000  |
| H  | 0.83356700  | 2.51541200  | 0.43673200  |
| C  | -2.63859200 | -0.19574400 | -0.09268600 |
| C  | -3.98545200 | -0.53995700 | -0.14306400 |
| C  | -2.01542200 | -2.35703200 | -0.64977900 |
| C  | -4.33829400 | -1.84479400 | -0.46321500 |
| H  | -4.75646000 | 0.19704300  | 0.06468600  |
| H  | -1.19184600 | -3.04447800 | -0.83821700 |
| H  | -5.38622500 | -2.13108800 | -0.50794800 |
| C  | -3.33774500 | -2.77299700 | -0.72306400 |
| H  | -3.57068100 | -3.80315600 | -0.97714100 |
| N  | -1.66743000 | -1.10279300 | -0.34347600 |
| Ni | 0.16868200  | -0.40772300 | -0.12537500 |

**TS1<sub>D</sub><sup>Ni(0)</sup>**      **HF = -3469.0489922 hartree**       $\nu^\ddagger = -86.28 \text{ icm}^{-1}$

|    |             |             |             |
|----|-------------|-------------|-------------|
| C  | 3.12727800  | -1.46863900 | 2.06627100  |
| C  | 2.57801300  | -0.33053800 | 1.50641600  |
| C  | 1.82208900  | -0.47091400 | 0.33452200  |
| C  | 1.71462700  | -1.71517200 | -0.33958100 |
| C  | 2.32001000  | -2.85233000 | 0.25152000  |
| C  | 3.00107000  | -2.72815100 | 1.44368800  |
| H  | 3.65235600  | -1.39423000 | 3.01813500  |
| H  | 2.66145500  | 0.63780300  | 1.99885600  |
| H  | 1.41684800  | -1.77130200 | -1.39184500 |
| H  | 2.30305200  | -3.80577400 | -0.27566900 |
| H  | 3.47369600  | -3.59775600 | 1.89612700  |
| Br | 2.56302300  | 1.42460200  | -1.33183000 |
| C  | -2.18625400 | 1.07366900  | 0.34139300  |
| C  | -2.98419600 | 2.15465900  | 0.69517900  |
| C  | -2.37614500 | 3.35643700  | 1.03773300  |
| C  | -0.99094700 | 3.45036000  | 1.00952200  |
| C  | -0.25439100 | 2.33142700  | 0.64406200  |
| N  | -0.83783000 | 1.17252600  | 0.32447600  |
| H  | -2.98399100 | 4.21248800  | 1.31994400  |
| H  | -4.06682700 | 2.06573800  | 0.70757900  |
| H  | -0.48014500 | 4.37446000  | 1.26401700  |
| H  | 0.83222800  | 2.34723100  | 0.55791300  |
| C  | -2.70361400 | -0.25107400 | -0.04468400 |
| C  | -4.05309000 | -0.56843900 | -0.14308700 |



|    |             |             |             |
|----|-------------|-------------|-------------|
| C  | -2.09775000 | -2.39991600 | -0.67754200 |
| C  | -4.41541400 | -1.85392200 | -0.52618000 |
| H  | -4.81699100 | 0.17349700  | 0.07215800  |
| H  | -1.28059100 | -3.09193000 | -0.87432900 |
| H  | -5.46591300 | -2.12102100 | -0.60945300 |
| C  | -3.42462100 | -2.78816500 | -0.80049100 |
| H  | -3.66815500 | -3.80217200 | -1.10342400 |
| N  | -1.74421900 | -1.16486000 | -0.31002700 |
| Ni | 0.08327000  | -0.49205400 | -0.03069800 |

**1<sub>b</sub><sup>Ni(0)</sup>**

**HF = -3469.1191172 hartree**

|    |             |             |             |
|----|-------------|-------------|-------------|
| C  | 4.00656100  | 0.57040900  | -1.20249900 |
| C  | 2.67674500  | 0.14873700  | -1.20063500 |
| C  | 1.98705800  | -0.05168900 | 0.00014700  |
| C  | 2.67670800  | 0.14900300  | 1.20090300  |
| C  | 4.00655700  | 0.57054300  | 1.20269200  |
| C  | 4.67494600  | 0.78887100  | 0.00007100  |
| H  | 4.52254900  | 0.73070700  | -2.14946400 |
| H  | 2.16836400  | -0.01391500 | -2.15402600 |
| H  | 2.16836900  | -0.01323700 | 2.15439500  |
| H  | 4.52264600  | 0.73094000  | 2.14958500  |
| H  | 5.71189000  | 1.12181100  | 0.00008900  |
| Br | 0.65916700  | -2.64200700 | -0.00018600 |
| C  | -1.66336600 | 1.71842200  | -0.00018200 |
| C  | -2.16208800 | 3.01575300  | -0.00020700 |
| C  | -1.27931400 | 4.08613500  | -0.00009600 |
| C  | 0.08328200  | 3.82717400  | -0.00001000 |
| C  | 0.51321400  | 2.50883600  | -0.00002900 |
| N  | -0.33096000 | 1.46772800  | -0.00008300 |
| H  | -1.65493900 | 5.10615500  | -0.00008600 |
| H  | -3.23328700 | 3.19318000  | -0.00029600 |
| H  | 0.81588700  | 4.62882200  | 0.00006600  |
| H  | 1.57255800  | 2.26726500  | -0.00010500 |
| C  | -2.52077900 | 0.52551400  | -0.00015000 |
| C  | -3.91089300 | 0.56956000  | -0.00010900 |
| C  | -2.53997800 | -1.78771700 | 0.00025400  |
| C  | -4.62280800 | -0.62262100 | 0.00018000  |
| H  | -4.43940800 | 1.51818500  | -0.00028200 |
| H  | -1.93844900 | -2.69530000 | 0.00031100  |
| H  | -5.70988800 | -0.60868000 | 0.00023700  |
| C  | -3.92725900 | -1.82370000 | 0.00040800  |
| H  | -4.44299800 | -2.77957800 | 0.00069500  |
| N  | -1.84826500 | -0.64444700 | -0.00005100 |
| Ni | 0.14746100  | -0.41565900 | 0.00006900  |

**2**

**HF = -9202.2713541 hartree**

|    |             |             |             |
|----|-------------|-------------|-------------|
| C  | -3.86699700 | 1.15731200  | 1.56111200  |
| C  | -3.95406500 | 1.96359500  | 2.69203900  |
| C  | -3.13676000 | 3.08364700  | 2.78538100  |
| C  | -2.26609300 | 3.38023200  | 1.74353200  |
| C  | -2.21676400 | 2.51511200  | 0.65931700  |
| N  | -2.98194800 | 1.42652500  | 0.58241200  |
| H  | -3.19118000 | 3.72474200  | 3.66197600  |
| H  | -4.64979100 | 1.73000400  | 3.49243400  |
| H  | -1.62702400 | 4.26202800  | 1.75567800  |
| H  | -1.53662400 | 2.68551300  | -0.17517400 |
| C  | -4.72569000 | -0.01432000 | 1.31777600  |
| C  | -5.76101200 | -0.39254300 | 2.16531200  |
| C  | -5.25913800 | -1.72082400 | -0.16488500 |
| C  | -6.55825900 | -1.47541800 | 1.82099500  |
| H  | -5.95515600 | 0.15731200  | 3.08135100  |
| H  | -5.02633500 | -2.21124100 | -1.10793100 |
| H  | -7.37089100 | -1.78302400 | 2.47399000  |
| C  | -6.31386500 | -2.14489900 | 0.62985800  |
| H  | -6.92478600 | -2.98432700 | 0.31220600  |
| N  | -4.47406700 | -0.69555700 | 0.17834100  |
| Ni | -2.92993300 | 0.02826900  | -0.88861500 |
| C  | -2.36243600 | -2.65214600 | -1.28471600 |
| C  | -2.29551800 | -3.89691000 | -1.91076200 |
| C  | -2.64503200 | -4.02154900 | -3.25306600 |
| C  | -3.05913000 | -2.90232800 | -3.96911300 |
| C  | -3.13002300 | -1.64808600 | -3.35622100 |
| C  | -2.79991500 | -1.55773600 | -2.01491900 |
| H  | -2.08461100 | -2.56052200 | -0.23484500 |
| H  | -1.96119000 | -4.76128200 | -1.33657700 |
| H  | -3.32970200 | -2.99392700 | -5.02009900 |
| H  | -3.45282700 | -0.77272500 | -3.91504200 |
| O  | 1.97650800  | -1.99746200 | -1.87419400 |
| S  | 3.43325600  | -2.13853500 | -2.04559700 |
| O  | 4.24895600  | -1.45231500 | -1.02443500 |
| O  | 3.91648500  | -1.98759700 | -3.42429200 |
| C  | 3.71040500  | -3.91789500 | -1.68409900 |
| F  | 3.06191100  | -4.67359100 | -2.56501600 |
| F  | 3.26389100  | -4.22159700 | -0.46586500 |
| F  | 5.00444800  | -4.21476300 | -1.74339600 |
| P  | 2.45419200  | 0.24944500  | 1.93026200  |
| P  | 2.19223400  | 2.23491500  | -0.86786200 |
| C  | 4.17640100  | 0.72337100  | 1.47773500  |
| H  | 4.80494400  | 0.48749700  | 2.34781400  |
| H  | 4.48134900  | 0.06097500  | 0.65508200  |
| C  | 4.34595900  | 2.18906100  | 1.08694100  |
| H  | 5.40959800  | 2.44263500  | 1.19120400  |

|    |             |             |             |
|----|-------------|-------------|-------------|
| H  | 3.82292600  | 2.83435700  | 1.80905200  |
| C  | 3.95057400  | 2.51630200  | -0.35043600 |
| H  | 4.21307600  | 3.55516100  | -0.59898600 |
| H  | 4.53058900  | 1.87404300  | -1.03096300 |
| Pd | 0.99754300  | 0.38849400  | 0.16744200  |
| C  | -0.53722000 | -3.41151200 | 1.57130000  |
| C  | 0.21167100  | -2.40971500 | 0.94963300  |
| C  | -0.04358500 | -1.06033900 | 1.18544800  |
| C  | -1.05371600 | -0.72754600 | 2.09304100  |
| C  | -1.82045500 | -1.71264600 | 2.70975700  |
| C  | -1.56974100 | -3.06251000 | 2.44563800  |
| H  | -0.31490600 | -4.45428100 | 1.35331700  |
| H  | 0.99983000  | -2.70119900 | 0.25191000  |
| H  | -1.25165500 | 0.31766100  | 2.33915300  |
| H  | -2.61746200 | -1.45351000 | 3.40800800  |
| Br | -4.31698000 | 1.35632800  | -2.34696000 |
| C  | 2.66112100  | -1.35844200 | 2.75822200  |
| C  | 1.97754400  | -1.65368600 | 3.94088300  |
| C  | 3.45218100  | -2.33902600 | 2.15266900  |
| C  | 2.10099500  | -2.91006900 | 4.52285000  |
| H  | 1.34261500  | -0.90190300 | 4.40883200  |
| C  | 3.57178500  | -3.59447700 | 2.74053300  |
| H  | 3.95302000  | -2.13492000 | 1.20496500  |
| C  | 2.90052400  | -3.88101800 | 3.92525900  |
| H  | 1.56997200  | -3.13072900 | 5.44700200  |
| H  | 4.18741800  | -4.35420900 | 2.26244300  |
| H  | 2.99649300  | -4.86428600 | 4.38213200  |
| C  | 2.02746600  | 1.43301000  | 3.25224200  |
| C  | 2.83016800  | 1.53281600  | 4.39582400  |
| C  | 0.95087400  | 2.30733100  | 3.09417400  |
| C  | 2.55354800  | 2.49053500  | 5.36272100  |
| H  | 3.67385000  | 0.85645000  | 4.53552100  |
| C  | 0.67631100  | 3.26864500  | 4.06355000  |
| H  | 0.33506300  | 2.24153000  | 2.19379000  |
| C  | 1.47651800  | 3.35976800  | 5.19670900  |
| H  | 3.18169300  | 2.56157100  | 6.24826200  |
| H  | -0.16063400 | 3.95261100  | 3.92930500  |
| H  | 1.26404300  | 4.11181100  | 5.95391300  |
| C  | 2.39081400  | 2.24298400  | -2.68548000 |
| C  | 2.71368900  | 3.41766400  | -3.37503800 |
| C  | 2.32801100  | 1.03281100  | -3.37918100 |
| C  | 2.95302200  | 3.37975700  | -4.74347800 |
| H  | 2.77162800  | 4.36795900  | -2.84346400 |
| C  | 2.58042100  | 0.99718500  | -4.74826300 |
| H  | 2.08699300  | 0.10946700  | -2.85078000 |
| C  | 2.88588900  | 2.16918700  | -5.43126300 |

|    |             |             |             |
|----|-------------|-------------|-------------|
| H  | 3.19717500  | 4.29763900  | -5.27500300 |
| H  | 2.54221000  | 0.04496500  | -5.27404900 |
| H  | 3.07738600  | 2.14238300  | -6.50244400 |
| C  | 1.30539700  | 3.79533400  | -0.50378300 |
| C  | 1.61724100  | 4.56424300  | 0.62113900  |
| C  | 0.22661100  | 4.18335700  | -1.30950000 |
| C  | 0.86943400  | 5.69582000  | 0.93552300  |
| H  | 2.45070100  | 4.28986100  | 1.26657600  |
| C  | -0.51762400 | 5.31554400  | -0.99634800 |
| H  | -0.03132100 | 3.59950800  | -2.19362700 |
| C  | -0.19897300 | 6.07436400  | 0.12828100  |
| H  | 1.12845900  | 6.28310500  | 1.81470400  |
| H  | -1.34965100 | 5.60590000  | -1.63523500 |
| H  | -0.78172600 | 6.96041600  | 0.37233000  |
| H  | -2.58977500 | -4.99158000 | -3.74341900 |
| O  | -2.37059300 | -3.95421700 | 3.08712300  |
| C  | -2.17616400 | -5.32330200 | 2.80694400  |
| H  | -2.92105600 | -5.86785600 | 3.39204200  |
| H  | -2.32653100 | -5.53907000 | 1.73846300  |
| H  | -1.17109400 | -5.65763900 | 3.10234100  |
| Br | -0.73678700 | 0.49668000  | -1.67980600 |

|                         |                                   |                                                            |             |
|-------------------------|-----------------------------------|------------------------------------------------------------|-------------|
| <b>TS2<sup>Ni</sup></b> | <b>HF = -9202.2713541 hartree</b> | <b><math>v^{\ddagger} = -58.33 \text{ icm}^{-1}</math></b> |             |
| C                       | -3.86699700                       | 1.15731200                                                 | 1.56111200  |
| C                       | -3.95406500                       | 1.96359500                                                 | 2.69203900  |
| C                       | -3.13676000                       | 3.08364700                                                 | 2.78538100  |
| C                       | -2.26609300                       | 3.38023200                                                 | 1.74353200  |
| C                       | -2.21676400                       | 2.51511200                                                 | 0.65931700  |
| N                       | -2.98194800                       | 1.42652500                                                 | 0.58241200  |
| H                       | -3.19118000                       | 3.72474200                                                 | 3.66197600  |
| H                       | -4.64979100                       | 1.73000400                                                 | 3.49243400  |
| H                       | -1.62702400                       | 4.26202800                                                 | 1.75567800  |
| H                       | -1.53662400                       | 2.68551300                                                 | -0.17517400 |
| C                       | -4.72569000                       | -0.01432000                                                | 1.31777600  |
| C                       | -5.76101200                       | -0.39254300                                                | 2.16531200  |
| C                       | -5.25913800                       | -1.72082400                                                | -0.16488500 |
| C                       | -6.55825900                       | -1.47541800                                                | 1.82099500  |
| H                       | -5.95515600                       | 0.15731200                                                 | 3.08135100  |
| H                       | -5.02633500                       | -2.21124100                                                | -1.10793100 |
| H                       | -7.37089100                       | -1.78302400                                                | 2.47399000  |
| C                       | -6.31386500                       | -2.14489900                                                | 0.62985800  |
| H                       | -6.92478600                       | -2.98432700                                                | 0.31220600  |
| N                       | -4.47406700                       | -0.69555700                                                | 0.17834100  |
| Ni                      | -2.92993300                       | 0.02826900                                                 | -0.88861500 |
| C                       | -2.36243600                       | -2.65214600                                                | -1.28471600 |
| C                       | -2.29551800                       | -3.89691000                                                | -1.91076200 |

|    |             |             |             |
|----|-------------|-------------|-------------|
| C  | -2.64503200 | -4.02154900 | -3.25306600 |
| C  | -3.05913000 | -2.90232800 | -3.96911300 |
| C  | -3.13002300 | -1.64808600 | -3.35622100 |
| C  | -2.79991500 | -1.55773600 | -2.01491900 |
| H  | -2.08461100 | -2.56052200 | -0.23484500 |
| H  | -1.96119000 | -4.76128200 | -1.33657700 |
| H  | -3.32970200 | -2.99392700 | -5.02009900 |
| H  | -3.45282700 | -0.77272500 | -3.91504200 |
| O  | 1.97650800  | -1.99746200 | -1.87419400 |
| S  | 3.43325600  | -2.13853500 | -2.04559700 |
| O  | 4.24895600  | -1.45231500 | -1.02443500 |
| O  | 3.91648500  | -1.98759700 | -3.42429200 |
| C  | 3.71040500  | -3.91789500 | -1.68409900 |
| F  | 3.06191100  | -4.67359100 | -2.56501600 |
| F  | 3.26389100  | -4.22159700 | -0.46586500 |
| F  | 5.00444800  | -4.21476300 | -1.74339600 |
| P  | 2.45419200  | 0.24944500  | 1.93026200  |
| P  | 2.19223400  | 2.23491500  | -0.86786200 |
| C  | 4.17640100  | 0.72337100  | 1.47773500  |
| H  | 4.80494400  | 0.48749700  | 2.34781400  |
| H  | 4.48134900  | 0.06097500  | 0.65508200  |
| C  | 4.34595900  | 2.18906100  | 1.08694100  |
| H  | 5.40959800  | 2.44263500  | 1.19120400  |
| H  | 3.82292600  | 2.83435700  | 1.80905200  |
| C  | 3.95057400  | 2.51630200  | -0.35043600 |
| H  | 4.21307600  | 3.55516100  | -0.59898600 |
| H  | 4.53058900  | 1.87404300  | -1.03096300 |
| Pd | 0.99754300  | 0.38849400  | 0.16744200  |
| C  | -0.53722000 | -3.41151200 | 1.57130000  |
| C  | 0.21167100  | -2.40971500 | 0.94963300  |
| C  | -0.04358500 | -1.06033900 | 1.18544800  |
| C  | -1.05371600 | -0.72754600 | 2.09304100  |
| C  | -1.82045500 | -1.71264600 | 2.70975700  |
| C  | -1.56974100 | -3.06251000 | 2.44563800  |
| H  | -0.31490600 | -4.45428100 | 1.35331700  |
| H  | 0.99983000  | -2.70119900 | 0.25191000  |
| H  | -1.25165500 | 0.31766100  | 2.33915300  |
| H  | -2.61746200 | -1.45351000 | 3.40800800  |
| Br | -4.31698000 | 1.35632800  | -2.34696000 |
| C  | 2.66112100  | -1.35844200 | 2.75822200  |
| C  | 1.97754400  | -1.65368600 | 3.94088300  |
| C  | 3.45218100  | -2.33902600 | 2.15266900  |
| C  | 2.10099500  | -2.91006900 | 4.52285000  |
| H  | 1.34261500  | -0.90190300 | 4.40883200  |
| C  | 3.57178500  | -3.59447700 | 2.74053300  |
| H  | 3.95302000  | -2.13492000 | 1.20496500  |

|    |             |             |             |
|----|-------------|-------------|-------------|
| C  | 2.90052400  | -3.88101800 | 3.92525900  |
| H  | 1.56997200  | -3.13072900 | 5.44700200  |
| H  | 4.18741800  | -4.35420900 | 2.26244300  |
| H  | 2.99649300  | -4.86428600 | 4.38213200  |
| C  | 2.02746600  | 1.43301000  | 3.25224200  |
| C  | 2.83016800  | 1.53281600  | 4.39582400  |
| C  | 0.95087400  | 2.30733100  | 3.09417400  |
| C  | 2.55354800  | 2.49053500  | 5.36272100  |
| H  | 3.67385000  | 0.85645000  | 4.53552100  |
| C  | 0.67631100  | 3.26864500  | 4.06355000  |
| H  | 0.33506300  | 2.24153000  | 2.19379000  |
| C  | 1.47651800  | 3.35976800  | 5.19670900  |
| H  | 3.18169300  | 2.56157100  | 6.24826200  |
| H  | -0.16063400 | 3.95261100  | 3.92930500  |
| H  | 1.26404300  | 4.11181100  | 5.95391300  |
| C  | 2.39081400  | 2.24298400  | -2.68548000 |
| C  | 2.71368900  | 3.41766400  | -3.37503800 |
| C  | 2.32801100  | 1.03281100  | -3.37918100 |
| C  | 2.95302200  | 3.37975700  | -4.74347800 |
| H  | 2.77162800  | 4.36795900  | -2.84346400 |
| C  | 2.58042100  | 0.99718500  | -4.74826300 |
| H  | 2.08699300  | 0.10946700  | -2.85078000 |
| C  | 2.88588900  | 2.16918700  | -5.43126300 |
| H  | 3.19717500  | 4.29763900  | -5.27500300 |
| H  | 2.54221000  | 0.04496500  | -5.27404900 |
| H  | 3.07738600  | 2.14238300  | -6.50244400 |
| C  | 1.30539700  | 3.79533400  | -0.50378300 |
| C  | 1.61724100  | 4.56424300  | 0.62113900  |
| C  | 0.22661100  | 4.18335700  | -1.30950000 |
| C  | 0.86943400  | 5.69582000  | 0.93552300  |
| H  | 2.45070100  | 4.28986100  | 1.26657600  |
| C  | -0.51762400 | 5.31554400  | -0.99634800 |
| H  | -0.03132100 | 3.59950800  | -2.19362700 |
| C  | -0.19897300 | 6.07436400  | 0.12828100  |
| H  | 1.12845900  | 6.28310500  | 1.81470400  |
| H  | -1.34965100 | 5.60590000  | -1.63523500 |
| H  | -0.78172600 | 6.96041600  | 0.37233000  |
| H  | -2.58977500 | -4.99158000 | -3.74341900 |
| O  | -2.37059300 | -3.95421700 | 3.08712300  |
| C  | -2.17616400 | -5.32330200 | 2.80694400  |
| H  | -2.92105600 | -5.86785600 | 3.39204200  |
| H  | -2.32653100 | -5.53907000 | 1.73846300  |
| H  | -1.17109400 | -5.65763900 | 3.10234100  |
| Br | -0.73678700 | 0.49668000  | -1.67980600 |

3<sup>Ni</sup> HF = -3815.0170452 hartree

|    |             |             |             |
|----|-------------|-------------|-------------|
| C  | -4.13565900 | 0.14139600  | 0.98280800  |
| C  | -4.85042900 | 1.05354100  | 1.75927000  |
| C  | -4.62794000 | 2.41228400  | 1.59610500  |
| C  | -3.69323400 | 2.82948800  | 0.65877300  |
| C  | -3.00597900 | 1.86385500  | -0.06199700 |
| N  | -3.20208100 | 0.55146800  | 0.09991200  |
| H  | -5.19123100 | 3.13336700  | 2.18423200  |
| H  | -5.60301900 | 0.71218800  | 2.46304600  |
| H  | -3.48601500 | 3.88201000  | 0.47802400  |
| H  | -2.26568600 | 2.14445200  | -0.80881200 |
| C  | -4.44258900 | -1.30219000 | 0.99322800  |
| C  | -5.34882200 | -1.87276300 | 1.88627700  |
| C  | -4.22945900 | -3.29562600 | -0.13963200 |
| C  | -5.69212300 | -3.20891700 | 1.74078000  |
| H  | -5.79050300 | -1.28653900 | 2.68632700  |
| H  | -3.78188500 | -3.82263500 | -0.97968200 |
| H  | -6.39444800 | -3.67063000 | 2.43039800  |
| C  | -5.14663000 | -3.92971900 | 0.68803900  |
| H  | -5.41447900 | -4.96670100 | 0.50659400  |
| N  | -3.85006100 | -2.02873500 | 0.02914700  |
| Ni | -2.31461900 | -0.91952400 | -1.11773000 |
| C  | -1.51651700 | -3.69490700 | -1.68224800 |
| C  | -1.09185000 | -4.76111900 | -2.47717700 |
| C  | -0.77262000 | -4.55297300 | -3.81402300 |
| C  | -0.87665700 | -3.26965400 | -4.34481300 |
| C  | -1.30870800 | -2.20700300 | -3.55222000 |
| C  | -1.64939100 | -2.41575500 | -2.21550100 |
| H  | -1.68940800 | -3.87317200 | -0.62103500 |
| H  | -0.98922500 | -5.75086900 | -2.03248400 |
| H  | -0.62316500 | -3.08604600 | -5.38874500 |
| H  | -1.38124700 | -1.21370400 | -3.98920200 |
| O  | 3.23497900  | -1.44736500 | -2.18934300 |
| S  | 4.26778500  | -0.75138600 | -1.40490400 |
| O  | 3.75083700  | 0.04085200  | -0.27078100 |
| O  | 5.31840600  | -0.08934800 | -2.18884500 |
| C  | 5.17303400  | -2.12414000 | -0.57839200 |
| F  | 5.81801200  | -2.86457300 | -1.47126800 |
| F  | 4.32714200  | -2.91602000 | 0.08573000  |
| F  | 6.05281600  | -1.64340800 | 0.29493600  |
| P  | 1.31834100  | 0.60411900  | 2.23592500  |
| P  | 1.30755500  | 2.80794900  | -0.32283100 |
| C  | 2.88496100  | 1.56863200  | 2.41470800  |
| H  | 3.24245700  | 1.37075800  | 3.43378400  |
| H  | 3.61291500  | 1.12818800  | 1.71917100  |
| C  | 2.76573800  | 3.06479100  | 2.17589800  |
| H  | 3.65496000  | 3.54917900  | 2.60142000  |

|    |             |             |             |
|----|-------------|-------------|-------------|
| H  | 1.91414800  | 3.48041200  | 2.73336800  |
| C  | 2.71772400  | 3.42470400  | 0.70018700  |
| H  | 2.75774000  | 4.51350500  | 0.55244100  |
| H  | 3.60462100  | 2.99789400  | 0.20735500  |
| Pd | 0.38303100  | 0.65943000  | 0.06554900  |
| C  | 1.10079600  | -3.01369800 | 0.22440300  |
| C  | 0.47303700  | -1.96259700 | -0.42776500 |
| C  | -0.69010400 | -1.31651800 | 0.08077100  |
| C  | -1.14912500 | -1.78648200 | 1.34711300  |
| C  | -0.60013300 | -2.88329700 | 1.96192100  |
| C  | 0.52290700  | -3.52343500 | 1.38983400  |
| H  | 1.99292400  | -3.45225200 | -0.21127100 |
| H  | 0.88223100  | -1.66008600 | -1.39254400 |
| H  | -1.98463600 | -1.28770500 | 1.83787000  |
| H  | -0.98418000 | -3.26709500 | 2.90583200  |
| Br | -4.06117600 | -0.52014700 | -2.72234600 |
| C  | 1.84525400  | -0.95197200 | 3.02852400  |
| C  | 1.15512500  | -1.50807800 | 4.10888800  |
| C  | 3.02436500  | -1.55782200 | 2.58119300  |
| C  | 1.65716400  | -2.63452600 | 4.75262800  |
| H  | 0.22368500  | -1.06058400 | 4.45430500  |
| C  | 3.53082600  | -2.67331800 | 3.23829500  |
| H  | 3.54993700  | -1.15546600 | 1.71603300  |
| C  | 2.84938400  | -3.21213700 | 4.32594600  |
| H  | 1.11417300  | -3.05900300 | 5.59487600  |
| H  | 4.46097500  | -3.12078800 | 2.88960400  |
| H  | 3.24394800  | -4.08876500 | 4.83673000  |
| C  | 0.20940700  | 1.41935500  | 3.43621200  |
| C  | 0.64856100  | 1.69481200  | 4.73897500  |
| C  | -1.05564200 | 1.85584300  | 3.03956200  |
| C  | -0.16313500 | 2.39794500  | 5.61882400  |
| H  | 1.62897300  | 1.35708900  | 5.07458400  |
| C  | -1.86715800 | 2.56401100  | 3.92299800  |
| H  | -1.39791000 | 1.65981000  | 2.02136500  |
| C  | -1.42146800 | 2.83672800  | 5.21034200  |
| H  | 0.18866600  | 2.60790000  | 6.62673300  |
| H  | -2.84636600 | 2.91053400  | 3.59694400  |
| H  | -2.05320500 | 3.39450000  | 5.89865400  |
| C  | 2.04161900  | 3.06573400  | -1.97784800 |
| C  | 2.24566900  | 4.36695800  | -2.45098700 |
| C  | 2.53954200  | 1.98493700  | -2.70735600 |
| C  | 2.91941100  | 4.57724500  | -3.64910300 |
| H  | 1.87348300  | 5.22333700  | -1.88887900 |
| C  | 3.22209000  | 2.19975400  | -3.89956500 |
| H  | 2.39559700  | 0.97016400  | -2.34255200 |
| C  | 3.40776600  | 3.49408300  | -4.37504300 |



|    |             |             |             |
|----|-------------|-------------|-------------|
| H  | 3.06565600  | 5.59201800  | -4.01389000 |
| H  | 3.61695600  | 1.34597300  | -4.44769500 |
| H  | 3.93749400  | 3.66124700  | -5.31102400 |
| C  | -0.00470900 | 4.07105900  | -0.17078500 |
| C  | -0.29095100 | 4.64758600  | 1.07161200  |
| C  | -0.76192500 | 4.45088000  | -1.28574800 |
| C  | -1.29183000 | 5.60595000  | 1.19233800  |
| H  | 0.26539800  | 4.35744800  | 1.96171700  |
| C  | -1.75945700 | 5.41239800  | -1.16313500 |
| H  | -0.55664600 | 4.00727600  | -2.25913600 |
| C  | -2.02075000 | 5.99829600  | 0.07356800  |
| H  | -1.49627300 | 6.04738300  | 2.16596600  |
| H  | -2.33104600 | 5.70814400  | -2.04057500 |
| H  | -2.79717900 | 6.75521000  | 0.16621600  |
| H  | -0.43343600 | -5.38033700 | -4.43517300 |
| O  | 0.95647000  | -4.60467400 | 2.04163500  |
| C  | 2.04831500  | -5.33250600 | 1.49703400  |
| H  | 2.22872900  | -6.16161900 | 2.18375800  |
| H  | 1.79790500  | -5.72132300 | 0.50153800  |
| H  | 2.94726600  | -4.70634700 | 1.43612400  |
| Br | -0.59028800 | 0.84672400  | -2.21053100 |

|            |                                   |             |             |
|------------|-----------------------------------|-------------|-------------|
| <b>4Ni</b> | <b>HF = -3237.6740201 hartree</b> |             |             |
| C          | -0.18532600                       | 3.81997400  | -1.84838100 |
| C          | -0.16318800                       | 2.45315800  | -1.57388000 |
| C          | -0.16298300                       | 1.99800200  | -0.25303600 |
| C          | -0.22374000                       | 2.92076000  | 0.78960100  |
| C          | -0.25316600                       | 4.28708700  | 0.51175900  |
| C          | -0.23101300                       | 4.74087600  | -0.80449500 |
| H          | -0.16809300                       | 4.16365100  | -2.88214100 |
| H          | -0.12275400                       | 1.74253000  | -2.40327200 |
| H          | -0.21689400                       | 2.56843400  | 1.82076200  |
| H          | -0.28991300                       | 5.00159400  | 1.33384000  |
| H          | -0.25104700                       | 5.80855300  | -1.01686800 |
| C          | 2.85508200                        | -0.93713200 | -0.69681700 |
| C          | 4.22289300                        | -1.02970100 | -0.93613900 |
| C          | 4.97777500                        | 0.13445400  | -0.99533500 |
| C          | 4.35297900                        | 1.36142500  | -0.81389400 |
| C          | 2.98435600                        | 1.37590600  | -0.58337800 |
| N          | 2.25746400                        | 0.25937700  | -0.53026900 |
| H          | 6.04815200                        | 0.07919400  | -1.17747000 |
| H          | 4.70182300                        | -1.99574300 | -1.06755600 |
| H          | 4.91028500                        | 2.29303500  | -0.84577100 |
| H          | 2.43861100                        | 2.30682200  | -0.42607300 |
| C          | 1.96484300                        | -2.10993100 | -0.58003500 |
| C          | 2.39830300                        | -3.42279400 | -0.73648900 |

|    |             |             |             |
|----|-------------|-------------|-------------|
| C  | -0.19549100 | -2.82614300 | -0.13204400 |
| C  | 1.48553700  | -4.45754600 | -0.57858600 |
| H  | 3.43432600  | -3.64357400 | -0.97712100 |
| H  | -1.21565600 | -2.52742300 | 0.11197400  |
| H  | 1.80771000  | -5.48922800 | -0.69628500 |
| C  | 0.16526500  | -4.16008600 | -0.26696700 |
| H  | -0.57704000 | -4.94108700 | -0.13027600 |
| N  | 0.67869000  | -1.83156300 | -0.28802900 |
| Ni | 0.27961000  | 0.16317200  | -0.01821300 |
| C  | -2.38562500 | 0.10029200  | 1.18496600  |
| C  | -3.73948400 | -0.20463100 | 1.15343300  |
| C  | -4.36911800 | -0.51205400 | -0.05684900 |
| C  | -3.62730200 | -0.51033100 | -1.23780900 |
| C  | -2.26681500 | -0.19539000 | -1.19185800 |
| C  | -1.62720400 | 0.09405800  | 0.01192300  |
| H  | -1.90418400 | 0.32407500  | 2.13642400  |
| H  | -4.33677000 | -0.21058700 | 2.06458000  |
| H  | -4.08908400 | -0.74170900 | -2.19482700 |
| H  | -1.70526300 | -0.19503000 | -2.12941800 |
| O  | -5.69761800 | -0.79195300 | 0.01823900  |
| C  | -6.37065600 | -1.09076300 | -1.18493800 |
| H  | -5.95184600 | -1.98412700 | -1.67038400 |
| H  | -7.41261000 | -1.28324000 | -0.91834100 |
| H  | -6.32869700 | -0.24834900 | -1.89045700 |
| Br | 0.87977700  | 0.02192500  | 2.39903700  |

|                         |                                   |                                                           |             |
|-------------------------|-----------------------------------|-----------------------------------------------------------|-------------|
| <b>TS3<sup>Ni</sup></b> | <b>HF = -3815.0163478 hartree</b> | <b><math>v^\ddagger = -151.51 \text{ icm}^{-1}</math></b> |             |
| C                       | -0.25532100                       | 3.76900100                                                | -1.87308900 |
| C                       | -0.30020800                       | 2.40589300                                                | -1.59050300 |
| C                       | -0.33810600                       | 1.95581700                                                | -0.26580000 |
| C                       | -0.36657400                       | 2.89310800                                                | 0.76955200  |
| C                       | -0.33163900                       | 4.25561300                                                | 0.48213100  |
| C                       | -0.27365200                       | 4.69970900                                                | -0.83681900 |
| H                       | -0.21085800                       | 4.10309000                                                | -2.90901500 |
| H                       | -0.29230500                       | 1.68863000                                                | -2.41446600 |
| H                       | -0.38415400                       | 2.55163100                                                | 1.80396300  |
| H                       | -0.34521800                       | 4.97608300                                                | 1.29947400  |
| H                       | -0.24635400                       | 5.76549900                                                | -1.05673000 |
| C                       | 2.88907200                        | -0.90623000                                               | -0.68303300 |
| C                       | 4.25940100                        | -0.97796400                                               | -0.91671400 |
| C                       | 4.99327100                        | 0.19930800                                                | -0.98685100 |
| C                       | 4.34688700                        | 1.41799000                                                | -0.82320200 |
| C                       | 2.97735900                        | 1.40957200                                                | -0.59573000 |
| N                       | 2.27226700                        | 0.28088000                                                | -0.53038700 |
| H                       | 6.06505300                        | 0.16111300                                                | -1.16548600 |
| H                       | 4.75590300                        | -1.93671200                                               | -1.03715000 |

|    |             |             |             |
|----|-------------|-------------|-------------|
| H  | 4.88823400  | 2.35859000  | -0.86693100 |
| H  | 2.41276500  | 2.33231800  | -0.45141900 |
| C  | 2.01459500  | -2.09403100 | -0.56509200 |
| C  | 2.47019000  | -3.40147700 | -0.70590000 |
| C  | -0.14099700 | -2.83857600 | -0.14615000 |
| C  | 1.56953100  | -4.44813300 | -0.55450200 |
| H  | 3.51288500  | -3.60942500 | -0.92914400 |
| H  | -1.16986400 | -2.55297800 | 0.08041600  |
| H  | 1.90882700  | -5.47581100 | -0.65910500 |
| C  | 0.23958300  | -4.16878600 | -0.26694500 |
| H  | -0.49297600 | -4.96017600 | -0.13717800 |
| N  | 0.72163400  | -1.83391000 | -0.29368100 |
| Ni | 0.28383000  | 0.17019800  | 0.00143100  |
| C  | -2.39896400 | 0.25736000  | 1.14744500  |
| C  | -3.72512800 | -0.14502000 | 1.12730300  |
| C  | -4.32430300 | -0.55648700 | -0.06833100 |
| C  | -3.57697900 | -0.55787300 | -1.24599000 |
| C  | -2.24453600 | -0.14369400 | -1.21272700 |
| C  | -1.63093300 | 0.25068400  | -0.02260600 |
| H  | -1.94292800 | 0.55880700  | 2.08952600  |
| H  | -4.32572800 | -0.14876200 | 2.03604000  |
| H  | -4.01361600 | -0.87211500 | -2.19099400 |
| H  | -1.67950900 | -0.14659900 | -2.14762400 |
| O  | -5.62783000 | -0.92806300 | 0.01807200  |
| C  | -6.27960700 | -1.31037500 | -1.17378600 |
| H  | -5.81019400 | -2.19627700 | -1.62516900 |
| H  | -7.30957100 | -1.55116700 | -0.90024900 |
| H  | -6.28287700 | -0.49336900 | -1.90950700 |
| Br | 0.84694100  | 0.03386700  | 2.42053100  |

|                         |                                    |                                                             |             |
|-------------------------|------------------------------------|-------------------------------------------------------------|-------------|
| <b>TS2<sup>pd</sup></b> | <b>HF = - 9202.2511787 hartree</b> | <b><math>v^{\ddagger} = - 72.11 \text{ icm}^{-1}</math></b> |             |
| C                       | -4.26679000                        | -1.58239500                                                 | -1.21509600 |
| C                       | -5.31930600                        | -1.44994400                                                 | -2.11853700 |
| C                       | -5.11642100                        | -1.79873200                                                 | -3.44582000 |
| C                       | -3.87283800                        | -2.27760900                                                 | -3.83859500 |
| C                       | -2.86950600                        | -2.36564200                                                 | -2.88489400 |
| N                       | -3.05938300                        | -2.01815100                                                 | -1.61188500 |
| H                       | -5.92485000                        | -1.69857800                                                 | -4.16585300 |
| H                       | -6.28717200                        | -1.07591200                                                 | -1.79801500 |
| H                       | -3.67324000                        | -2.56977100                                                 | -4.86546500 |
| H                       | -1.86665300                        | -2.70754000                                                 | -3.13821000 |
| C                       | -4.39163700                        | -1.29316000                                                 | 0.22449800  |
| C                       | -5.58541200                        | -0.87675700                                                 | 0.80893300  |
| C                       | -3.36447700                        | -1.38387500                                                 | 2.29268500  |
| C                       | -5.64375100                        | -0.69436100                                                 | 2.18247700  |
| H                       | -6.46724600                        | -0.69488700                                                 | 0.20191500  |

|    |             |             |             |
|----|-------------|-------------|-------------|
| H  | -2.46491800 | -1.62919700 | 2.85283500  |
| H  | -6.56572200 | -0.35857700 | 2.65064700  |
| C  | -4.51773600 | -0.97366100 | 2.94489700  |
| H  | -4.52299100 | -0.88205500 | 4.02690500  |
| N  | -3.28528500 | -1.50437900 | 0.96638600  |
| Ni | -1.60859400 | -2.01216300 | -0.13021300 |
| C  | -0.29542400 | -0.99727000 | 2.43400700  |
| C  | 0.10888900  | -1.39974400 | 3.71122000  |
| C  | 0.69954400  | -2.64154100 | 3.89635200  |
| C  | 0.95803200  | -3.46214100 | 2.79893900  |
| C  | 0.59523500  | -3.05815400 | 1.52052300  |
| C  | -0.10117700 | -1.85546200 | 1.35742700  |
| H  | -0.77711000 | -0.03016200 | 2.33440200  |
| H  | -0.05565900 | -0.71777300 | 4.54455000  |
| H  | 1.45874400  | -4.41986700 | 2.93336200  |
| H  | 0.81051200  | -3.69691400 | 0.66868300  |
| O  | 0.82966100  | 1.99773400  | 2.25493500  |
| S  | 0.35585700  | 2.42046100  | 3.58747200  |
| O  | 1.42472400  | 2.68592200  | 4.55873100  |
| O  | -0.80165800 | 1.67252100  | 4.10366400  |
| C  | -0.36828600 | 4.07793700  | 3.25185700  |
| F  | -1.43611100 | 3.96076500  | 2.45789700  |
| F  | 0.51548400  | 4.86507000  | 2.63983800  |
| F  | -0.75111100 | 4.66645900  | 4.37803800  |
| P  | 1.31231200  | 2.04319300  | -1.22867100 |
| P  | 3.12736600  | -0.30734900 | 0.38550800  |
| C  | 2.50795900  | 3.06989300  | -0.26846500 |
| H  | 2.59495600  | 4.02891900  | -0.79727200 |
| H  | 2.02790800  | 3.26936700  | 0.69957000  |
| C  | 3.87979000  | 2.45300800  | -0.05337800 |
| H  | 4.53248100  | 3.23491300  | 0.35899300  |
| H  | 4.32909800  | 2.17017600  | -1.01645800 |
| C  | 3.88563400  | 1.28958200  | 0.92752400  |
| H  | 4.90799900  | 1.06706000  | 1.26402900  |
| H  | 3.30921300  | 1.57682800  | 1.81916600  |
| Pd | 0.74197700  | -0.01492500 | -0.20456900 |
| C  | -3.15624600 | 1.84951100  | 0.09452300  |
| C  | -1.91118500 | 1.28450300  | 0.35576200  |
| C  | -1.19129000 | 0.59556800  | -0.62783200 |
| C  | -1.71785000 | 0.58837700  | -1.93024600 |
| C  | -2.94616600 | 1.16199500  | -2.21349400 |
| C  | -3.68340400 | 1.78115100  | -1.19806600 |
| H  | -3.69081600 | 2.35136200  | 0.89881000  |
| H  | -1.48994500 | 1.42761600  | 1.35170700  |
| H  | -1.16647100 | 0.10972500  | -2.74181900 |
| H  | -3.36650100 | 1.13085900  | -3.21853400 |

|    |             |             |             |
|----|-------------|-------------|-------------|
| Br | -2.15210100 | -4.38861300 | 0.27514000  |
| C  | 0.05161600  | 3.30853300  | -1.61062700 |
| C  | -0.34972900 | 3.60701900  | -2.91450700 |
| C  | -0.50050800 | 4.01787900  | -0.54147100 |
| C  | -1.28301800 | 4.61453800  | -3.14079500 |
| H  | 0.06739200  | 3.05557200  | -3.75673200 |
| C  | -1.43255500 | 5.02193300  | -0.76958000 |
| H  | -0.20788300 | 3.77162400  | 0.47656800  |
| C  | -1.82435800 | 5.32341700  | -2.07174300 |
| H  | -1.58732700 | 4.84579100  | -4.15994500 |
| H  | -1.85280700 | 5.56343300  | 0.07688100  |
| H  | -2.55372400 | 6.11078500  | -2.25339000 |
| C  | 2.15953100  | 1.73263000  | -2.81972000 |
| C  | 2.87480900  | 2.75822100  | -3.45219400 |
| C  | 2.10980400  | 0.46939300  | -3.41282500 |
| C  | 3.53378000  | 2.51657600  | -4.65082900 |
| H  | 2.91546000  | 3.75565500  | -3.01457800 |
| C  | 2.77297100  | 0.22964500  | -4.61387300 |
| H  | 1.55890400  | -0.33731800 | -2.92843600 |
| C  | 3.48484100  | 1.25073100  | -5.23246300 |
| H  | 4.08679200  | 3.31967400  | -5.13382400 |
| H  | 2.73292400  | -0.76253500 | -5.06009900 |
| H  | 4.00454600  | 1.06338800  | -6.17018700 |
| C  | 3.58697500  | -1.30125600 | 1.86223700  |
| C  | 4.31287300  | -2.49110600 | 1.76219500  |
| C  | 3.26034500  | -0.80583400 | 3.12962300  |
| C  | 4.72115900  | -3.16390200 | 2.90992300  |
| H  | 4.57963500  | -2.88911600 | 0.78380300  |
| C  | 3.68301700  | -1.47399100 | 4.27317200  |
| H  | 2.66244700  | 0.10174400  | 3.23236300  |
| C  | 4.41587000  | -2.65205800 | 4.16757800  |
| H  | 5.29125400  | -4.08667000 | 2.81782600  |
| H  | 3.42384900  | -1.07543600 | 5.25300500  |
| H  | 4.74514200  | -3.17338600 | 5.06453700  |
| C  | 4.23648100  | -0.93992300 | -0.92621700 |
| C  | 5.46742400  | -0.34924900 | -1.23070100 |
| C  | 3.83445100  | -2.07206900 | -1.64342000 |
| C  | 6.26198900  | -0.86587400 | -2.24996600 |
| H  | 5.82389800  | 0.51575300  | -0.67511200 |
| C  | 4.63908800  | -2.60000000 | -2.64640600 |
| H  | 2.87198100  | -2.53251600 | -1.42177200 |
| C  | 5.85095900  | -1.99042200 | -2.95876300 |
| H  | 7.21252200  | -0.38957000 | -2.48267700 |
| H  | 4.31360700  | -3.48380700 | -3.19187800 |
| H  | 6.47741300  | -2.39330400 | -3.75221100 |
| H  | 0.99619200  | -2.96092300 | 4.89420200  |

|    |             |             |             |
|----|-------------|-------------|-------------|
| O  | -4.88602500 | 2.28254000  | -1.56314900 |
| C  | -5.60439400 | 3.03662400  | -0.60740600 |
| H  | -6.51627200 | 3.37407500  | -1.10490200 |
| H  | -5.87542200 | 2.43004200  | 0.26835900  |
| H  | -5.02580700 | 3.91077600  | -0.27570000 |
| Br | 0.27414600  | -2.31353300 | -1.62809600 |

**3Pd**

**HF = -9202.2618929 hartree**

|    |             |             |             |
|----|-------------|-------------|-------------|
| C  | 4.64193600  | -1.45234500 | 0.76452700  |
| C  | 5.76425900  | -1.42470200 | 1.58727700  |
| C  | 5.65566600  | -1.89480800 | 2.88926000  |
| C  | 4.43661600  | -2.38824000 | 3.33816800  |
| C  | 3.36084300  | -2.38024500 | 2.46195100  |
| N  | 3.46440300  | -1.91732600 | 1.21731600  |
| H  | 6.52199200  | -1.88021200 | 3.54585700  |
| H  | 6.71541200  | -1.04938900 | 1.22109900  |
| H  | 4.31433800  | -2.77103500 | 4.34705500  |
| H  | 2.37391500  | -2.73701400 | 2.75561100  |
| C  | 4.64574400  | -1.00275900 | -0.64141900 |
| C  | 5.76076800  | -0.45028000 | -1.26587900 |
| C  | 3.42003800  | -0.87255500 | -2.60744900 |
| C  | 5.68059500  | -0.10815500 | -2.60866300 |
| H  | 6.68258000  | -0.28693000 | -0.71453800 |
| H  | 2.45934200  | -1.05050900 | -3.09251800 |
| H  | 6.54030000  | 0.32749400  | -3.11184000 |
| C  | 4.49629300  | -0.33601200 | -3.29957800 |
| H  | 4.39887100  | -0.09739600 | -4.35452700 |
| N  | 3.49076400  | -1.17656500 | -1.31091100 |
| Ni | 1.94106500  | -1.81148200 | -0.14903800 |
| C  | -0.05991700 | -0.14520600 | -2.93392900 |
| C  | 0.09915200  | -0.63747900 | -4.22665700 |
| C  | 0.03456100  | -2.00817700 | -4.46990200 |
| C  | -0.21467700 | -2.87329000 | -3.41146400 |
| C  | -0.38409500 | -2.37899400 | -2.11451800 |
| C  | -0.28405500 | -1.01080200 | -1.85856300 |
| H  | -0.07995600 | 0.93235600  | -2.78826800 |
| H  | 0.25238300  | 0.06446600  | -5.04660800 |
| H  | -0.28389300 | -3.94741800 | -3.58169700 |
| H  | -0.60416300 | -3.08460100 | -1.31494200 |
| O  | -1.23749900 | 2.44424500  | -1.38517400 |
| S  | -1.42683900 | 3.42712400  | -2.47188700 |
| O  | -2.75117200 | 4.06168300  | -2.49064200 |
| O  | -0.90540500 | 2.99855500  | -3.77719800 |
| C  | -0.29945400 | 4.79456800  | -1.97964000 |
| F  | 0.93833300  | 4.33831600  | -1.80019500 |
| F  | -0.70928300 | 5.34253300  | -0.83604000 |

|    |             |             |             |
|----|-------------|-------------|-------------|
| F  | -0.27367300 | 5.73857700  | -2.91301800 |
| P  | -1.45828200 | 1.34316100  | 1.90190000  |
| P  | -3.12867500 | -0.44763400 | -0.52768400 |
| C  | -2.79206500 | 2.50606700  | 1.35307300  |
| H  | -2.96157700 | 3.21219400  | 2.17745700  |
| H  | -2.38899800 | 3.07044700  | 0.50223000  |
| C  | -4.10364000 | 1.83263000  | 0.96932200  |
| H  | -4.87375400 | 2.61442700  | 0.91194700  |
| H  | -4.43108300 | 1.15707100  | 1.77407700  |
| C  | -4.10067100 | 1.11604200  | -0.37827800 |
| H  | -5.12855100 | 0.88573300  | -0.69373900 |
| H  | -3.67332500 | 1.78041000  | -1.14193000 |
| Pd | -0.73100800 | -0.09782400 | -0.03048200 |
| C  | 3.00174700  | 2.07879600  | -0.45037300 |
| C  | 1.87322200  | 1.31047800  | -0.70786900 |
| C  | 1.29030900  | 0.48890900  | 0.26676400  |
| C  | 1.88348500  | 0.49631400  | 1.54443400  |
| C  | 3.02853600  | 1.22736400  | 1.81134600  |
| C  | 3.60013500  | 2.02112800  | 0.81332600  |
| H  | 3.40640700  | 2.70976800  | -1.23861300 |
| H  | 1.44608000  | 1.36714600  | -1.70673500 |
| H  | 1.44675400  | -0.08799700 | 2.35579800  |
| H  | 3.49306200  | 1.20718900  | 2.79727900  |
| Br | 2.35521900  | -4.11710700 | -0.80893300 |
| C  | -0.19634800 | 2.53146100  | 2.48646900  |
| C  | 0.33719000  | 2.52740600  | 3.77698300  |
| C  | 0.28077600  | 3.45541000  | 1.55139900  |
| C  | 1.32149600  | 3.44764400  | 4.12764000  |
| H  | -0.01111500 | 1.80443600  | 4.51385100  |
| C  | 1.26159100  | 4.37286700  | 1.90404200  |
| H  | -0.09933700 | 3.43130600  | 0.53191200  |
| C  | 1.78412500  | 4.37170900  | 3.19536000  |
| H  | 1.72944400  | 3.43930600  | 5.13692000  |
| H  | 1.62577100  | 5.08019900  | 1.15908100  |
| H  | 2.55636500  | 5.08689000  | 3.47313900  |
| C  | -2.20922100 | 0.63644900  | 3.41840500  |
| C  | -2.67230600 | 1.48444200  | 4.43547100  |
| C  | -2.43029300 | -0.73776600 | 3.53389200  |
| C  | -3.32928900 | 0.96467700  | 5.54300000  |
| H  | -2.51585700 | 2.56113500  | 4.36772400  |
| C  | -3.09307900 | -1.25735600 | 4.64397300  |
| H  | -2.08614000 | -1.41330600 | 2.75283400  |
| C  | -3.54219800 | -0.40888400 | 5.64812000  |
| H  | -3.68112300 | 1.63475500  | 6.32502600  |
| H  | -3.26025800 | -2.33048100 | 4.71570900  |
| H  | -4.06102300 | -0.81437100 | 6.51466500  |

|    |             |             |             |
|----|-------------|-------------|-------------|
| C  | -3.56526500 | -0.93509800 | -2.23691300 |
| C  | -4.26093600 | -2.10958500 | -2.53271100 |
| C  | -3.19087100 | -0.07977700 | -3.27903500 |
| C  | -4.57000100 | -2.42512300 | -3.85292900 |
| H  | -4.56713000 | -2.78343200 | -1.73376900 |
| C  | -3.50698100 | -0.39489800 | -4.59438500 |
| H  | -2.62641000 | 0.82719700  | -3.06221700 |
| C  | -4.19386800 | -1.57079300 | -4.88465700 |
| H  | -5.11204800 | -3.34299500 | -4.07326400 |
| H  | -3.20183700 | 0.27656300  | -5.39547400 |
| H  | -4.43657700 | -1.82057700 | -5.91587300 |
| C  | -3.98238400 | -1.67529400 | 0.51975200  |
| C  | -5.20302100 | -1.41157600 | 1.14787200  |
| C  | -3.39368500 | -2.93529000 | 0.68289400  |
| C  | -5.80248300 | -2.37479600 | 1.95380900  |
| H  | -5.69916400 | -0.45229000 | 1.01445400  |
| C  | -3.99816500 | -3.89929800 | 1.48073200  |
| H  | -2.45763800 | -3.16700300 | 0.17553500  |
| C  | -5.19890100 | -3.61582900 | 2.12748200  |
| H  | -6.74844700 | -2.15276000 | 2.44385100  |
| H  | -3.53019700 | -4.87501200 | 1.59721200  |
| H  | -5.66811200 | -4.36696500 | 2.75984300  |
| H  | 0.15963200  | -2.39674100 | -5.47920500 |
| O  | 4.71262200  | 2.70227200  | 1.16031500  |
| C  | 5.28974200  | 3.55400500  | 0.18927400  |
| H  | 6.16361900  | 4.00973200  | 0.65947200  |
| H  | 5.60620800  | 2.98772100  | -0.69814500 |
| H  | 4.58636600  | 4.34209900  | -0.11501800 |
| Br | -0.02491800 | -2.27879200 | 1.28877000  |

**4<sup>Pd</sup>**      **HF = -3392.9408191 hartree**

|   |             |             |             |
|---|-------------|-------------|-------------|
| C | -0.82793100 | -2.40991200 | 1.90621900  |
| C | -1.22131800 | -3.28790700 | 2.91464400  |
| C | -1.91096900 | -2.81354200 | 4.02991700  |
| C | -2.20057700 | -1.45648400 | 4.14179400  |
| C | -1.80516700 | -0.56994500 | 3.13770800  |
| C | -1.10040600 | -1.04810900 | 2.03445500  |
| H | -0.31081000 | -2.78295300 | 1.01933800  |
| H | -0.99755800 | -4.35045400 | 2.82178900  |
| H | -2.74079600 | -1.08108600 | 5.01033000  |
| H | -2.03995800 | 0.49194000  | 3.23433300  |
| O | 0.59498500  | -1.77958700 | -1.20560200 |
| S | 1.08356300  | -2.68034200 | -2.26778200 |
| O | 1.56702600  | -1.99070300 | -3.47540500 |
| O | 0.24376400  | -3.86116900 | -2.51223100 |
| C | 2.61004100  | -3.38682800 | -1.52438200 |



|    |             |             |             |
|----|-------------|-------------|-------------|
| F  | 2.32355700  | -3.96311800 | -0.35888300 |
| F  | 3.51454800  | -2.43260100 | -1.30472400 |
| F  | 3.14789000  | -4.29568100 | -2.32892800 |
| P  | 0.57203900  | 1.68694400  | -1.08651600 |
| P  | -2.35583000 | -0.15089000 | -0.56352200 |
| C  | -0.01773500 | 1.27125500  | -2.78216500 |
| H  | 0.41256800  | 2.01068300  | -3.47163100 |
| H  | 0.41734800  | 0.29707900  | -3.04780900 |
| C  | -1.53706600 | 1.21915500  | -2.92832100 |
| H  | -1.77056700 | 1.28564600  | -3.99916100 |
| H  | -2.00621800 | 2.10634500  | -2.47116900 |
| C  | -2.16622800 | -0.06648100 | -2.39746200 |
| H  | -3.15902600 | -0.22456500 | -2.84054900 |
| H  | -1.54719100 | -0.92605900 | -2.69000600 |
| Pd | -0.30043000 | 0.23092900  | 0.64039900  |
| C  | 3.63644300  | -0.46442600 | 2.04879500  |
| C  | 2.49821700  | -0.39527300 | 1.25702800  |
| C  | 1.49434300  | 0.54082100  | 1.53526700  |
| C  | 1.72101400  | 1.53751400  | 2.49719100  |
| C  | 2.85520300  | 1.48291300  | 3.28621000  |
| C  | 3.81716400  | 0.47927100  | 3.07086700  |
| H  | 4.38182700  | -1.23220300 | 1.85543800  |
| H  | 2.36702900  | -1.09690000 | 0.43303600  |
| H  | 0.98935200  | 2.32898400  | 2.66419900  |
| H  | 3.03262200  | 2.20804100  | 4.07837900  |
| C  | 2.38792100  | 1.75059700  | -1.27935200 |
| C  | 3.13424800  | 2.74334700  | -0.63572400 |
| C  | 3.05060500  | 0.74168100  | -1.98520000 |
| C  | 4.52307100  | 2.73001000  | -0.70266300 |
| H  | 2.62872000  | 3.53503500  | -0.08189600 |
| C  | 4.44069500  | 0.73420300  | -2.04887500 |
| H  | 2.49232900  | -0.05261800 | -2.48179000 |
| C  | 5.17896700  | 1.72517100  | -1.40992500 |
| H  | 5.09358400  | 3.50997100  | -0.20179600 |
| H  | 4.94720100  | -0.05673000 | -2.59976300 |
| H  | 6.26604400  | 1.71571600  | -1.46179800 |
| C  | 0.07915200  | 3.43052300  | -0.85014400 |
| C  | 0.28611600  | 4.38738500  | -1.85109400 |
| C  | -0.50072500 | 3.82471500  | 0.35721800  |
| C  | -0.09907700 | 5.70651500  | -1.64886200 |
| H  | 0.76199600  | 4.10949500  | -2.79150100 |
| C  | -0.88515200 | 5.14698300  | 0.56171700  |
| H  | -0.64783700 | 3.08477300  | 1.14505900  |
| C  | -0.68845000 | 6.08665500  | -0.44437100 |
| H  | 0.06193400  | 6.44322200  | -2.43338100 |
| H  | -1.33979000 | 5.43916400  | 1.50646000  |

|   |             |             |             |
|---|-------------|-------------|-------------|
| H | -0.99077600 | 7.12062600  | -0.29013600 |
| C | -3.16511100 | -1.77156500 | -0.32762300 |
| C | -4.24571900 | -1.92240900 | 0.54621600  |
| C | -2.63449000 | -2.89916000 | -0.96236400 |
| C | -4.79739800 | -3.18052100 | 0.76721800  |
| H | -4.66433600 | -1.05504000 | 1.05672400  |
| C | -3.18863800 | -4.15419100 | -0.73790800 |
| H | -1.76571000 | -2.81478100 | -1.61325300 |
| C | -4.27144100 | -4.29853900 | 0.12510500  |
| H | -5.64160700 | -3.28589100 | 1.44615200  |
| H | -2.76299000 | -5.02246800 | -1.23882700 |
| H | -4.70502800 | -5.28173100 | 0.29891700  |
| C | -3.65082400 | 1.08180200  | -0.19092700 |
| C | -4.83493900 | 1.15019500  | -0.93511900 |
| C | -3.45558900 | 1.98153000  | 0.85874600  |
| C | -5.79174600 | 2.11366600  | -0.64132100 |
| H | -5.02088100 | 0.44003600  | -1.74095800 |
| C | -4.41252600 | 2.94888800  | 1.15242100  |
| H | -2.54253400 | 1.92215100  | 1.45167200  |
| C | -5.57907800 | 3.01686700  | 0.39890500  |
| H | -6.70801900 | 2.16006600  | -1.22646800 |
| H | -4.24281300 | 3.64875200  | 1.96851100  |
| H | -6.32910100 | 3.77321900  | 0.62180800  |
| H | -2.23100600 | -3.50504300 | 4.80762300  |
| O | 4.88839300  | 0.52026700  | 3.88167800  |
| C | 5.90663200  | -0.44888500 | 3.69962800  |
| H | 6.65546800  | -0.25227100 | 4.46911800  |
| H | 5.51118000  | -1.46528600 | 3.82632600  |
| H | 6.36849800  | -0.35573300 | 2.70793700  |

|                         |                                   |                                                             |             |
|-------------------------|-----------------------------------|-------------------------------------------------------------|-------------|
| <b>TS3<sup>pd</sup></b> | <b>HF = -3392.9387011 hartree</b> | <b><math>v^{\ddagger} = -147.67 \text{ icm}^{-1}</math></b> |             |
| C                       | -0.45490200                       | -2.39798900                                                 | 2.13102300  |
| C                       | -0.84432800                       | -3.29174600                                                 | 3.12893000  |
| C                       | -1.66041500                       | -2.86607100                                                 | 4.17470300  |
| C                       | -2.07133600                       | -1.53698100                                                 | 4.22536900  |
| C                       | -1.67519500                       | -0.64102300                                                 | 3.22994400  |
| C                       | -0.88571800                       | -1.06737000                                                 | 2.15903800  |
| H                       | 0.18073800                        | -2.75207200                                                 | 1.31552000  |
| H                       | -0.50634700                       | -4.32743700                                                 | 3.08749500  |
| H                       | -2.70187500                       | -1.19039500                                                 | 5.04431500  |
| H                       | -1.99900600                       | 0.40054300                                                  | 3.29379100  |
| O                       | 0.78365100                        | -1.61055900                                                 | -1.46533900 |
| S                       | 1.34579800                        | -2.59691300                                                 | -2.40714000 |
| O                       | 1.90982900                        | -2.01445400                                                 | -3.63437300 |
| O                       | 0.53029900                        | -3.80475000                                                 | -2.59824700 |
| C                       | 2.82341700                        | -3.20864600                                                 | -1.49836900 |

|    |             |             |             |
|----|-------------|-------------|-------------|
| F  | 2.46250700  | -3.72165900 | -0.32331200 |
| F  | 3.67488100  | -2.20695900 | -1.27026600 |
| F  | 3.45695800  | -4.14716400 | -2.19212800 |
| P  | 0.37418000  | 1.71461900  | -1.10340600 |
| P  | -2.36826100 | -0.29182400 | -0.56964100 |
| C  | -0.14407200 | 1.22964500  | -2.80137100 |
| H  | 0.25816200  | 1.96551400  | -3.51144700 |
| H  | 0.34632800  | 0.26911300  | -3.01407000 |
| C  | -1.65746100 | 1.08318800  | -2.96989900 |
| H  | -1.87631400 | 1.10885900  | -4.04580100 |
| H  | -2.18427200 | 1.95369900  | -2.54448300 |
| C  | -2.22988400 | -0.22001000 | -2.41362300 |
| H  | -3.22857900 | -0.40597600 | -2.83228600 |
| H  | -1.59505000 | -1.06297300 | -2.72013300 |
| Pd | -0.36452600 | 0.23484700  | 0.62206900  |
| C  | 3.69416200  | -0.19150400 | 1.83477500  |
| C  | 2.48057600  | -0.25193300 | 1.19607800  |
| C  | 1.34290000  | 0.49768400  | 1.63182600  |
| C  | 1.52624100  | 1.37335800  | 2.74254700  |
| C  | 2.72735400  | 1.45294700  | 3.39330900  |
| C  | 3.83395400  | 0.68209000  | 2.93697700  |
| H  | 4.53455000  | -0.77886300 | 1.47252500  |
| H  | 2.36922900  | -0.89269800 | 0.32171400  |
| H  | 0.68687900  | 1.97486000  | 3.09279500  |
| H  | 2.88385600  | 2.10172500  | 4.25263200  |
| C  | 2.19380000  | 1.89470200  | -1.21129800 |
| C  | 2.83272700  | 2.90765100  | -0.48661800 |
| C  | 2.96879600  | 0.95474200  | -1.89929700 |
| C  | 4.22075200  | 2.97966000  | -0.45093000 |
| H  | 2.24333300  | 3.64705500  | 0.05643100  |
| C  | 4.35777600  | 1.03558800  | -1.86537100 |
| H  | 2.49712400  | 0.13797200  | -2.44497600 |
| C  | 4.98681700  | 2.04334800  | -1.14041900 |
| H  | 4.70529300  | 3.77492000  | 0.11288000  |
| H  | 4.94914700  | 0.29673700  | -2.40393900 |
| H  | 6.07348400  | 2.10069700  | -1.11267900 |
| C  | -0.22703200 | 3.42727800  | -0.89084000 |
| C  | -0.19788800 | 4.35910100  | -1.93419800 |
| C  | -0.69634000 | 3.82532800  | 0.36368600  |
| C  | -0.64791700 | 5.65751400  | -1.72680800 |
| H  | 0.18198900  | 4.07710000  | -2.91587700 |
| C  | -1.14011600 | 5.12750700  | 0.57403600  |
| H  | -0.71236300 | 3.10084600  | 1.18021100  |
| C  | -1.12071000 | 6.04235000  | -0.47397200 |
| H  | -0.62719300 | 6.37343900  | -2.54612500 |
| H  | -1.50270900 | 5.42579700  | 1.55590900  |

|   |             |             |             |
|---|-------------|-------------|-------------|
| H | -1.47371700 | 7.05952800  | -0.31552000 |
| C | -3.02002800 | -1.97660400 | -0.29503700 |
| C | -4.10830600 | -2.21973500 | 0.54748500  |
| C | -2.33873000 | -3.05821000 | -0.86392000 |
| C | -4.51635400 | -3.52548800 | 0.80596100  |
| H | -4.64077600 | -1.38785000 | 1.00882500  |
| C | -2.75615800 | -4.35994900 | -0.61080600 |
| H | -1.46133700 | -2.89347600 | -1.48970900 |
| C | -3.84568100 | -4.59716600 | 0.22349300  |
| H | -5.36597900 | -3.70446200 | 1.46256200  |
| H | -2.21888400 | -5.19077100 | -1.06619100 |
| H | -4.16953400 | -5.61697600 | 0.42350600  |
| C | -3.76814400 | 0.82952700  | -0.21361400 |
| C | -4.98235100 | 0.74184000  | -0.90555800 |
| C | -3.61322000 | 1.81713100  | 0.76169900  |
| C | -6.01310500 | 1.63177200  | -0.63083300 |
| H | -5.13175500 | -0.03345500 | -1.65768200 |
| C | -4.64367900 | 2.71271900  | 1.03475200  |
| H | -2.66975300 | 1.88405100  | 1.30478100  |
| C | -5.84291300 | 2.62063200  | 0.33716700  |
| H | -6.95310000 | 1.55574900  | -1.17401800 |
| H | -4.50514400 | 3.48286900  | 1.79155200  |
| H | -6.64998500 | 3.32021000  | 0.54631200  |
| H | -1.96604300 | -3.56495000 | 4.95199300  |
| O | 4.96020600  | 0.87036200  | 3.60400200  |
| C | 6.14671200  | 0.19207800  | 3.18932900  |
| H | 6.93140600  | 0.52937000  | 3.86671900  |
| H | 6.01935700  | -0.89259500 | 3.27616100  |
| H | 6.40048100  | 0.46353800  | 2.15802000  |

**5<sup>pd</sup>**

**HF = -3393.029194 hartree**

|   |             |             |             |
|---|-------------|-------------|-------------|
| C | 0.58196200  | 1.68315400  | 2.49873700  |
| C | 1.78901100  | 2.36387100  | 2.65666900  |
| C | 2.87882900  | 1.73912700  | 3.24712800  |
| C | 2.76042400  | 0.42086500  | 3.69104100  |
| C | 1.56296200  | -0.26359400 | 3.54841400  |
| C | 0.44573500  | 0.34934200  | 2.94530100  |
| H | -0.26197900 | 2.19339700  | 2.02981500  |
| H | 1.87261100  | 3.38964800  | 2.30309600  |
| H | 3.60548500  | -0.07283700 | 4.16780000  |
| H | 1.47603600  | -1.27882200 | 3.93345400  |
| O | -1.87623200 | 2.78916400  | 0.44495900  |
| S | -1.04198700 | 3.41507900  | -0.59518400 |
| O | -0.53361300 | 2.49317300  | -1.63055400 |
| O | -0.05993800 | 4.39222000  | -0.10322800 |
| C | -2.25127300 | 4.43889600  | -1.52970800 |

|    |             |             |             |
|----|-------------|-------------|-------------|
| F  | -2.81833800 | 5.33833000  | -0.73209100 |
| F  | -3.21019800 | 3.67047300  | -2.04536700 |
| F  | -1.64596700 | 5.07947600  | -2.52467200 |
| P  | -0.89152800 | -1.19541600 | -1.20423600 |
| P  | 2.27181800  | 0.04030600  | -0.74420500 |
| C  | -0.46060700 | -0.52245300 | -2.86776100 |
| H  | -1.08420000 | -1.04316500 | -3.60839500 |
| H  | -0.75066600 | 0.53719300  | -2.86405300 |
| C  | 1.01679700  | -0.65752700 | -3.23038100 |
| H  | 1.11002700  | -0.48766300 | -4.31175800 |
| H  | 1.35765200  | -1.69278000 | -3.06612300 |
| C  | 1.93953700  | 0.34190700  | -2.53264900 |
| H  | 2.90721900  | 0.40609800  | -3.05107900 |
| H  | 1.48990800  | 1.34652500  | -2.56975800 |
| Pd | 0.30734900  | -0.16816400 | 0.54975800  |
| C  | -3.28172900 | -0.35312400 | 2.69807700  |
| C  | -2.06875000 | 0.31475400  | 2.78579600  |
| C  | -0.84357700 | -0.37320900 | 2.80345300  |
| C  | -0.89138300 | -1.78405200 | 2.72980800  |
| C  | -2.09360300 | -2.45806500 | 2.62795000  |
| C  | -3.30159300 | -1.74963200 | 2.61924700  |
| H  | -4.20414000 | 0.22141600  | 2.70584200  |
| H  | -2.07463000 | 1.40086800  | 2.85188300  |
| H  | 0.03460200  | -2.35883200 | 2.74217200  |
| H  | -2.12455000 | -3.54371300 | 2.55574100  |
| C  | -2.70663000 | -1.02983200 | -1.15819900 |
| C  | -3.54820500 | -2.08842900 | -0.80534200 |
| C  | -3.25720200 | 0.23555600  | -1.40406100 |
| C  | -4.92309400 | -1.88967100 | -0.72383400 |
| H  | -3.13152500 | -3.07406600 | -0.59864500 |
| C  | -4.63018700 | 0.42890300  | -1.31776600 |
| H  | -2.60621700 | 1.07833500  | -1.63924800 |
| C  | -5.46664500 | -0.63398900 | -0.98128000 |
| H  | -5.56980400 | -2.72174700 | -0.44904700 |
| H  | -5.04589500 | 1.41637900  | -1.51108000 |
| H  | -6.54279500 | -0.48265000 | -0.91503000 |
| C  | -0.53513400 | -2.97875600 | -1.38191000 |
| C  | -1.06668400 | -3.73372700 | -2.43465300 |
| C  | 0.35733300  | -3.58306400 | -0.49327800 |
| C  | -0.70838200 | -5.06757500 | -2.58945800 |
| H  | -1.77029700 | -3.28153400 | -3.13458000 |
| C  | 0.72485200  | -4.91601200 | -0.65446800 |
| H  | 0.78010900  | -2.99276300 | 0.32106000  |
| C  | 0.19074500  | -5.65791000 | -1.70245400 |
| H  | -1.12827600 | -5.64859300 | -3.40821900 |
| H  | 1.43036700  | -5.36891900 | 0.03992500  |

|   |             |             |             |
|---|-------------|-------------|-------------|
| H | 0.47457100  | -6.70058400 | -1.83213100 |
| C | 3.41102100  | 1.40758900  | -0.34267800 |
| C | 4.72567300  | 1.20213800  | 0.08301300  |
| C | 2.90912900  | 2.71157200  | -0.42637200 |
| C | 5.53064300  | 2.29023000  | 0.40939900  |
| H | 5.12816800  | 0.19218000  | 0.15736500  |
| C | 3.71786500  | 3.79368500  | -0.10417000 |
| H | 1.87328000  | 2.88436300  | -0.72374200 |
| C | 5.03017100  | 3.58569700  | 0.31703800  |
| H | 6.55514600  | 2.12236300  | 0.73700500  |
| H | 3.31239700  | 4.80242000  | -0.17094200 |
| H | 5.66123800  | 4.43395900  | 0.57581900  |
| C | 3.28493700  | -1.47488000 | -0.65461300 |
| C | 3.90957800  | -2.04341300 | -1.76774500 |
| C | 3.41009100  | -2.10061600 | 0.59221400  |
| C | 4.63340200  | -3.22548100 | -1.63724600 |
| H | 3.83331000  | -1.57077300 | -2.74622900 |
| C | 4.14637500  | -3.27168200 | 0.72379000  |
| H | 2.91715000  | -1.66131200 | 1.46337200  |
| C | 4.75277100  | -3.83995200 | -0.39451700 |
| H | 5.10880900  | -3.66549800 | -2.51179600 |
| H | 4.24074900  | -3.74626100 | 1.69873000  |
| H | 5.31825400  | -4.76461400 | -0.29681700 |
| H | 3.81990600  | 2.27372500  | 3.36388400  |
| O | -4.42296000 | -2.49451400 | 2.54241400  |
| C | -5.66937100 | -1.83131600 | 2.64312200  |
| H | -6.43488600 | -2.60520300 | 2.55234600  |
| H | -5.77193500 | -1.32641800 | 3.61350100  |
| H | -5.79807900 | -1.10002700 | 1.83306900  |

**6<sup>Pd</sup>**

**HF = -2815.5992709 hartree**

|   |             |             |             |
|---|-------------|-------------|-------------|
| O | 0.82583400  | 3.50629000  | -0.00002200 |
| S | -0.62305600 | 3.45706600  | 0.22896100  |
| O | -1.30400300 | 2.31689500  | -0.46123300 |
| O | -1.35536500 | 4.71692200  | 0.11926200  |
| C | -0.77447800 | 3.00509300  | 2.01181300  |
| F | -0.35617800 | 4.01177900  | 2.76573200  |
| F | -0.04338000 | 1.92985600  | 2.29720300  |
| F | -2.04306400 | 2.74123500  | 2.31160100  |
| P | -1.50384800 | -1.23022400 | -0.78080600 |
| P | 1.90194800  | -0.87351700 | -0.70037400 |
| C | -0.89233100 | -2.79210100 | -1.54563500 |
| H | -1.65234600 | -3.57311300 | -1.39187500 |
| H | -0.88037500 | -2.58775200 | -2.62747600 |
| C | 0.48294100  | -3.28633000 | -1.09266000 |
| H | 0.60298700  | -4.31007600 | -1.47120900 |

|   |             |             |             |
|---|-------------|-------------|-------------|
| H | 0.52517500  | -3.37287800 | 0.00486000  |
| C | 1.67510500  | -2.46719600 | -1.59303300 |
| H | 2.59279200  | -3.06165600 | -1.47552400 |
| C | 2.39973000  | -1.40999000 | 0.97894900  |
| C | 3.65877500  | -1.97739700 | 1.20346400  |
| C | 1.50334400  | -1.28337800 | 2.04474000  |
| H | 4.37010100  | -2.07395300 | 0.38231200  |
| C | 4.01435400  | -2.41006200 | 2.47530300  |
| C | 1.86012900  | -1.72295300 | 3.31663700  |
| H | 0.51984900  | -0.83911700 | 1.87807600  |
| H | 4.99727000  | -2.84630400 | 2.64290900  |
| C | 3.11490600  | -2.28400800 | 3.53197200  |
| H | 1.15641300  | -1.61915800 | 4.14060900  |
| H | 3.39654200  | -2.62129100 | 4.52769300  |
| C | 3.40111100  | -0.11391200 | -1.40991700 |
| C | 3.65532100  | 1.21962500  | -1.06290900 |
| C | 4.27973500  | -0.77978300 | -2.26895300 |
| H | 2.95477600  | 1.75251800  | -0.41395200 |
| C | 4.78169900  | 1.86859800  | -1.55252000 |
| C | 5.40159100  | -0.12176500 | -2.76591800 |
| H | 4.09776300  | -1.81485600 | -2.55540500 |
| H | 4.97417800  | 2.90361400  | -1.27677600 |
| C | 5.65517400  | 1.19822300  | -2.40669000 |
| H | 6.08067700  | -0.64645700 | -3.43512800 |
| H | 6.53327900  | 1.70862100  | -2.79748400 |
| C | -3.06189800 | -0.93136900 | -1.68138400 |
| C | -3.05952700 | -0.00648500 | -2.72938800 |
| C | -4.23222900 | -1.63521300 | -1.38045900 |
| H | -2.14747500 | 0.55030200  | -2.95319500 |
| C | -4.21464000 | 0.20837700  | -3.47471500 |
| C | -5.38581400 | -1.41475800 | -2.12453300 |
| H | -4.24147800 | -2.35490000 | -0.56104900 |
| H | -4.20838700 | 0.92970100  | -4.28945800 |
| C | -5.37681500 | -0.49471800 | -3.17078800 |
| H | -6.29536200 | -1.96329000 | -1.88706800 |
| H | -6.28265800 | -0.32232400 | -3.74885600 |
| C | -1.99735800 | -1.63558200 | 0.92573700  |
| C | -1.96334400 | -2.92491400 | 1.46139000  |
| C | -2.33632200 | -0.55663600 | 1.75360400  |
| H | -1.70542100 | -3.78003100 | 0.83763300  |
| C | -2.25032500 | -3.12904700 | 2.80923300  |
| C | -2.62559300 | -0.76367600 | 3.09563300  |
| H | -2.35248400 | 0.45528600  | 1.34363600  |
| H | -2.21551000 | -4.13586000 | 3.22070400  |
| C | -2.57562300 | -2.05173700 | 3.62683300  |
| H | -2.88003600 | 0.08427400  | 3.72903500  |

|    |             |             |             |
|----|-------------|-------------|-------------|
| H  | -2.79004400 | -2.21478700 | 4.68123900  |
| H  | 1.56444700  | -2.23862600 | -2.66387600 |
| Pd | 0.06758500  | 0.52015300  | -0.71251700 |

**2<sub>n</sub><sup>Ni</sup>**

**HF = -12081.4306075 hartree**

|    |             |             |             |
|----|-------------|-------------|-------------|
| C  | -2.05751200 | 2.57177200  | -0.22826800 |
| C  | -1.89713600 | 3.89644200  | 0.16441900  |
| C  | -1.87793700 | 4.20732600  | 1.51707900  |
| C  | -2.02392600 | 3.18687900  | 2.44685600  |
| C  | -2.15716200 | 1.88490700  | 1.98712300  |
| N  | -2.16597200 | 1.58397900  | 0.68660300  |
| H  | -1.76064400 | 5.23946800  | 1.83779900  |
| H  | -1.80766100 | 4.68519400  | -0.57670100 |
| H  | -2.03314200 | 3.38573600  | 3.51464800  |
| H  | -2.26806100 | 1.04989700  | 2.67715600  |
| C  | -2.16078100 | 2.15205000  | -1.63663300 |
| C  | -1.99288700 | 3.01276200  | -2.71630900 |
| C  | -2.55357000 | 0.36186200  | -3.05869200 |
| C  | -2.11458300 | 2.50725300  | -4.00454100 |
| H  | -1.75861600 | 4.06205800  | -2.56348000 |
| H  | -2.75981300 | -0.70631600 | -3.12617200 |
| H  | -1.98109000 | 3.16364800  | -4.86079200 |
| C  | -2.40535800 | 1.16121100  | -4.18375600 |
| H  | -2.50893000 | 0.72919700  | -5.17473300 |
| N  | -2.43262000 | 0.84684900  | -1.82435100 |
| Ni | -2.48613400 | -0.23381900 | -0.09648100 |
| C  | -0.54112800 | -1.64749100 | 3.27304100  |
| C  | -0.86047800 | -1.21899200 | 1.98469700  |
| C  | -2.19244100 | -1.15598200 | 1.59286800  |
| C  | -3.20831800 | -1.58012700 | 2.43742300  |
| C  | -2.87736800 | -2.01344300 | 3.72359100  |
| C  | -1.55170800 | -2.04048100 | 4.14633000  |
| H  | 0.50415200  | -1.67758700 | 3.58493500  |
| H  | -0.07429600 | -0.91636600 | 1.29216900  |
| H  | -4.24582000 | -1.54950000 | 2.11156300  |
| H  | -3.67216300 | -2.33107200 | 4.39727900  |
| H  | -1.30521900 | -2.37795700 | 5.15114400  |
| Br | -2.37460100 | -2.37171400 | -1.00423200 |
| Br | -4.92490400 | 0.11241900  | 0.04955800  |
| C  | 3.96592900  | 1.77642700  | -0.46347900 |
| C  | 4.94706400  | 2.55454200  | -1.07118000 |
| C  | 5.77578800  | 1.97530900  | -2.02238300 |
| C  | 5.61952500  | 0.63018600  | -2.32877100 |
| C  | 4.61696600  | -0.08173300 | -1.68504900 |
| N  | 3.79904300  | 0.48161500  | -0.79658500 |
| H  | 6.54805400  | 2.56823400  | -2.50578800 |



|    |            |             |             |
|----|------------|-------------|-------------|
| H  | 5.08029600 | 3.59642700  | -0.79498500 |
| H  | 6.26095500 | 0.13250800  | -3.04990700 |
| H  | 4.46576100 | -1.14269800 | -1.87543400 |
| C  | 3.08831900 | 2.27101900  | 0.61381200  |
| C  | 3.04566200 | 3.59713500  | 1.03532200  |
| C  | 1.51769200 | 1.66416400  | 2.21172900  |
| C  | 2.20952500 | 3.94316900  | 2.08811000  |
| H  | 3.65086500 | 4.35647900  | 0.54869600  |
| H  | 0.91690500 | 0.85833700  | 2.63745100  |
| H  | 2.16332000 | 4.97401400  | 2.43026200  |
| C  | 1.43919100 | 2.96102500  | 2.69866500  |
| H  | 0.78293000 | 3.19060500  | 3.53328000  |
| N  | 2.32031700 | 1.33523400  | 1.19982000  |
| Ni | 2.29306300 | -0.47742600 | 0.26282300  |
| C  | 1.89238000 | -3.65566900 | -2.50042400 |
| C  | 2.18581800 | -2.41363300 | -1.93612900 |
| C  | 2.00393200 | -2.22148900 | -0.57171500 |
| C  | 1.49766600 | -3.24313600 | 0.22551300  |
| C  | 1.18440000 | -4.47397200 | -0.35291800 |
| C  | 1.38888800 | -4.68604300 | -1.71241000 |
| H  | 2.04011400 | -3.80270500 | -3.56946300 |
| H  | 2.51206200 | -1.60011800 | -2.58172200 |
| H  | 1.34468600 | -3.10172800 | 1.29463000  |
| H  | 0.78667100 | -5.27070200 | 0.27446200  |
| H  | 1.15155300 | -5.65019700 | -2.15824000 |
| Br | 0.59079700 | 0.33886100  | -1.09010400 |
| Br | 3.83125300 | -1.42194400 | 1.70170400  |

|                                     |                                    |                                                            |             |
|-------------------------------------|------------------------------------|------------------------------------------------------------|-------------|
| <b>TS2<sub>h</sub><sup>Ni</sup></b> | <b>HF = -12081.4040545 hartree</b> | <b><math>\nu^\ddagger = -58.83 \text{ icm}^{-1}</math></b> |             |
| C                                   | -2.71563600                        | 2.29612600                                                 | 0.83631100  |
| C                                   | -2.93115200                        | 3.30663800                                                 | 1.77008300  |
| C                                   | -2.68127200                        | 3.04975600                                                 | 3.11129500  |
| C                                   | -2.22372400                        | 1.79325100                                                 | 3.48981900  |
| C                                   | -2.02049600                        | 0.84131000                                                 | 2.50054500  |
| N                                   | -2.25163100                        | 1.09109200                                                 | 1.21227500  |
| H                                   | -2.85231800                        | 3.82337900                                                 | 3.85584100  |
| H                                   | -3.31242900                        | 4.27587300                                                 | 1.46166200  |
| H                                   | -2.02696500                        | 1.54877400                                                 | 4.53004900  |
| H                                   | -1.67174500                        | -0.16646500                                                | 2.73775000  |
| C                                   | -3.01819300                        | 2.44232300                                                 | -0.60229700 |
| C                                   | -3.37482800                        | 3.64576800                                                 | -1.20239400 |
| C                                   | -3.20350100                        | 1.32159400                                                 | -2.63057100 |
| C                                   | -3.65626200                        | 3.66199300                                                 | -2.56282600 |
| H                                   | -3.42424100                        | 4.56334500                                                 | -0.62322900 |
| H                                   | -3.10022700                        | 0.36223300                                                 | -3.13747100 |

|    |             |             |             |
|----|-------------|-------------|-------------|
| H  | -3.93385700 | 4.59427400  | -3.04849200 |
| C  | -3.57490700 | 2.48315300  | -3.29320900 |
| H  | -3.78745600 | 2.45883700  | -4.35783900 |
| N  | -2.93637700 | 1.30889800  | -1.32430300 |
| Ni | -2.24632700 | -0.31293100 | -0.30654400 |
| C  | 0.97801200  | -3.40738300 | 3.49052900  |
| C  | 0.55833300  | -2.16911800 | 2.98953600  |
| C  | -0.35555600 | -2.20078200 | 1.96303100  |
| C  | -0.90102700 | -3.33203600 | 1.40108700  |
| C  | -0.47675100 | -4.55530000 | 1.92855100  |
| C  | 0.46028800  | -4.58764700 | 2.96088800  |
| H  | 1.70805200  | -3.44199000 | 4.29798400  |
| H  | 0.95517100  | -1.24290300 | 3.40438800  |
| H  | -1.59637000 | -3.28096800 | 0.56219100  |
| H  | -0.87365300 | -5.48440900 | 1.52133100  |
| H  | 0.79085000  | -5.54528400 | 3.35872200  |
| Br | -2.09795900 | -2.04708000 | -1.97745100 |
| Br | -4.34490600 | -1.15163500 | 0.60425300  |
| C  | 3.36622500  | 2.44984100  | -0.55014800 |
| C  | 4.20196800  | 3.39982100  | -1.12975100 |
| C  | 5.01596200  | 3.02634100  | -2.18990000 |
| C  | 4.99083600  | 1.70978500  | -2.62892000 |
| C  | 4.12693100  | 0.82025400  | -2.00576700 |
| N  | 3.31539500  | 1.18501600  | -1.01232100 |
| H  | 5.67821000  | 3.75398600  | -2.65202500 |
| H  | 4.23728100  | 4.41546500  | -0.74673000 |
| H  | 5.63004200  | 1.36746900  | -3.43727000 |
| H  | 4.08536700  | -0.22554900 | -2.30366300 |
| C  | 2.54171200  | 2.72237500  | 0.63955300  |
| C  | 2.39669200  | 3.98334200  | 1.21154900  |
| C  | 1.21898100  | 1.77368400  | 2.28889500  |
| C  | 1.64085100  | 4.11726000  | 2.36762700  |
| H  | 2.86402800  | 4.85486200  | 0.76253600  |
| H  | 0.75773400  | 0.86039900  | 2.66618400  |
| H  | 1.51969400  | 5.09406900  | 2.82904100  |
| C  | 1.04701600  | 2.99291500  | 2.92741400  |
| H  | 0.46127000  | 3.05454700  | 3.84003900  |
| N  | 1.94588200  | 1.64505300  | 1.18084100  |
| Ni | 2.04906500  | -0.07861400 | 0.07929100  |
| C  | 2.02066500  | -2.81343300 | -3.14572100 |
| C  | 2.04309000  | -1.63860700 | -2.39219100 |
| C  | 2.03070700  | -1.71794600 | -1.00393700 |
| C  | 1.95892200  | -2.94870300 | -0.36472300 |
| C  | 1.91006800  | -4.11581700 | -1.12856000 |
| C  | 1.95337900  | -4.05314500 | -2.51714600 |
| H  | 2.03267200  | -2.74636200 | -4.23273000 |

|    |            |             |             |
|----|------------|-------------|-------------|
| H  | 2.02837800 | -0.67922000 | -2.90583200 |
| H  | 1.95764800 | -3.01735500 | 0.72012400  |
| H  | 1.85104600 | -5.07782800 | -0.62025900 |
| H  | 1.92847600 | -4.96620000 | -3.10919600 |
| Br | 0.09986000 | 0.62828700  | -1.01025500 |
| Br | 3.86128500 | -0.87488000 | 1.28124200  |

**3<sub>h</sub><sup>Ni</sup>**

**HF = -12081.4367568 hartree**

|    |             |             |             |
|----|-------------|-------------|-------------|
| C  | -2.85749800 | 2.12174500  | 0.35407400  |
| C  | -3.08350900 | 3.31215400  | 1.03967000  |
| C  | -2.81056700 | 3.36879900  | 2.40052300  |
| C  | -2.31656400 | 2.24034200  | 3.04392600  |
| C  | -2.11515800 | 1.08918900  | 2.29399100  |
| N  | -2.37550600 | 1.03754100  | 0.98849600  |
| H  | -2.98723200 | 4.28870800  | 2.95279600  |
| H  | -3.48137800 | 4.18329900  | 0.52725800  |
| H  | -2.09156500 | 2.24234900  | 4.10698600  |
| H  | -1.73972000 | 0.17009000  | 2.74719500  |
| C  | -3.14452300 | 1.93860100  | -1.08367000 |
| C  | -3.56622700 | 2.96034900  | -1.92842000 |
| C  | -3.20920500 | 0.40457500  | -2.83006100 |
| C  | -3.81541300 | 2.67007700  | -3.26414900 |
| H  | -3.69544400 | 3.97313500  | -1.55768200 |
| H  | -3.03845800 | -0.63224300 | -3.12025100 |
| H  | -4.14444000 | 3.45720800  | -3.93803500 |
| C  | -3.63764700 | 1.37265900  | -3.72788500 |
| H  | -3.82191100 | 1.10966400  | -4.76526800 |
| N  | -2.97218500 | 0.68667200  | -1.54871900 |
| Ni | -2.31448900 | -0.65798400 | -0.17128700 |
| C  | 0.48157500  | -0.87097600 | 4.13056900  |
| C  | 1.26022200  | -0.41427000 | 3.06152500  |
| C  | 1.02655700  | -0.88795300 | 1.77286300  |
| C  | 0.03786500  | -1.85373500 | 1.57224700  |
| C  | -0.72533700 | -2.31457500 | 2.64426400  |
| C  | -0.51343400 | -1.81939900 | 3.92932900  |
| H  | 0.67483500  | -0.47841300 | 5.12793600  |
| H  | 2.05219000  | 0.30305800  | 3.26177500  |
| H  | -0.14394900 | -2.28094100 | 0.58849300  |
| H  | -1.49114200 | -3.06812100 | 2.45627200  |
| H  | -1.11082900 | -2.17807100 | 4.76524200  |
| Br | -2.01423400 | -2.70836700 | -1.41091000 |
| Br | -4.47440000 | -1.28670200 | 0.74163500  |
| C  | 3.14035000  | 2.10512400  | -1.24147900 |
| C  | 3.92832000  | 2.82943300  | -2.13263200 |
| C  | 4.72085000  | 2.15046800  | -3.04619300 |
| C  | 4.71942200  | 0.76276600  | -3.03527200 |

|    |            |             |             |
|----|------------|-------------|-------------|
| C  | 3.91541600 | 0.10846600  | -2.11374800 |
| N  | 3.12916400 | 0.75802200  | -1.25260800 |
| H  | 5.34259700 | 2.70210300  | -3.74672200 |
| H  | 3.94194900 | 3.91466100  | -2.10439700 |
| H  | 5.33601000 | 0.18648900  | -3.71871200 |
| H  | 3.90144100 | -0.97730900 | -2.05497000 |
| C  | 2.30358700 | 2.74807300  | -0.21500600 |
| C  | 2.05414700 | 4.11818700  | -0.19845000 |
| C  | 0.99287400 | 2.44345400  | 1.66260500  |
| C  | 1.25181000 | 4.65141900  | 0.79934400  |
| H  | 2.46819500 | 4.76629300  | -0.96485200 |
| H  | 0.56960500 | 1.73901400  | 2.37601600  |
| H  | 1.04692100 | 5.71862700  | 0.82480400  |
| C  | 0.71190500 | 3.79923500  | 1.75195200  |
| H  | 0.07560600 | 4.16750000  | 2.55219600  |
| N  | 1.77440900 | 1.92743400  | 0.71343300  |
| Ni | 2.04255600 | -0.11666000 | 0.29500300  |
| C  | 2.21435600 | -3.62959800 | -2.00611700 |
| C  | 2.00041800 | -2.32621600 | -1.55010800 |
| C  | 2.32569500 | -1.98516000 | -0.23949100 |
| C  | 2.83133900 | -2.96171900 | 0.61764500  |
| C  | 3.02872300 | -4.26131100 | 0.15752800  |
| C  | 2.72512500 | -4.60172100 | -1.15714900 |
| H  | 1.95988900 | -3.87330600 | -3.03681700 |
| H  | 1.57034000 | -1.60147300 | -2.23521200 |
| H  | 3.07286600 | -2.72674300 | 1.65038800  |
| H  | 3.42386400 | -5.00976500 | 0.84310100  |
| H  | 2.88106500 | -5.61826800 | -1.51342700 |
| Br | 0.06834900 | 0.16411500  | -0.95062700 |
| Br | 4.04596600 | -0.14807600 | 1.43231100  |

|                                     |                                    |                                                             |             |
|-------------------------------------|------------------------------------|-------------------------------------------------------------|-------------|
| <b>TS3<sub>h</sub><sup>Ni</sup></b> | <b>HF = -12081.4305083 hartree</b> | <b><math>v^{\ddagger} = -214.69 \text{ icm}^{-1}</math></b> |             |
| C                                   | -2.80602100                        | 1.94534500                                                  | 0.72893000  |
| C                                   | -3.06433700                        | 2.99802800                                                  | 1.60306700  |
| C                                   | -2.78062900                        | 2.83783900                                                  | 2.95305800  |
| C                                   | -2.24156200                        | 1.63672600                                                  | 3.39750200  |
| C                                   | -2.00921700                        | 0.63379100                                                  | 2.46625100  |
| N                                   | -2.28287800                        | 0.78760900                                                  | 1.17110200  |
| H                                   | -2.98373500                        | 3.64565900                                                  | 3.65192900  |
| H                                   | -3.49921400                        | 3.92589500                                                  | 1.24250200  |
| H                                   | -2.00737400                        | 1.47011700                                                  | 4.44526900  |
| H                                   | -1.59952400                        | -0.33386800                                                 | 2.75987300  |
| C                                   | -3.11786500                        | 1.99188400                                                  | -0.71335500 |
| C                                   | -3.52001300                        | 3.14476400                                                  | -1.37980000 |
| C                                   | -3.26629100                        | 0.75013500                                                  | -2.67216800 |
| C                                   | -3.80489600                        | 3.07336100                                                  | -2.73735600 |

|    |             |             |             |
|----|-------------|-------------|-------------|
| H  | -3.60198400 | 4.09174600  | -0.85392700 |
| H  | -3.13332900 | -0.23303200 | -3.12383800 |
| H  | -4.11732300 | 3.96515000  | -3.27500300 |
| C  | -3.68190700 | 1.85776800  | -3.39852800 |
| H  | -3.89613300 | 1.76361100  | -4.45897800 |
| N  | -2.99381400 | 0.82206500  | -1.36900100 |
| Ni | -2.27860800 | -0.72059600 | -0.23964800 |
| C  | 0.64537200  | -1.70788400 | 3.82260200  |
| C  | 1.44564300  | -1.14850400 | 2.82201700  |
| C  | 1.15453700  | -1.37783300 | 1.47387300  |
| C  | 0.08365400  | -2.22641900 | 1.15822500  |
| C  | -0.69515000 | -2.79522500 | 2.16039700  |
| C  | -0.42584500 | -2.53189000 | 3.50305000  |
| H  | 0.88083100  | -1.49148800 | 4.86372000  |
| H  | 2.29318400  | -0.53346900 | 3.11185100  |
| H  | -0.13489000 | -2.49094700 | 0.12620500  |
| H  | -1.51332500 | -3.45646700 | 1.87425100  |
| H  | -1.03494100 | -2.97662500 | 4.28734700  |
| Br | -2.10852300 | -2.55330100 | -1.82237700 |
| Br | -4.39475700 | -1.46943000 | 0.68274200  |
| C  | 2.72371400  | 2.33812600  | -1.23507600 |
| C  | 3.24573500  | 3.17446900  | -2.21791400 |
| C  | 3.96465600  | 2.61416600  | -3.26562600 |
| C  | 4.15000200  | 1.23811400  | -3.30746300 |
| C  | 3.59815800  | 0.46776700  | -2.29255600 |
| N  | 2.90305400  | 1.00826900  | -1.29519600 |
| H  | 4.37965800  | 3.25247700  | -4.04162000 |
| H  | 3.10127400  | 4.24995400  | -2.17079200 |
| H  | 4.70954100  | 0.76383800  | -4.10845300 |
| H  | 3.70612300  | -0.61794800 | -2.26921500 |
| C  | 1.96932900  | 2.82343200  | -0.06106700 |
| C  | 1.69484700  | 4.16730700  | 0.17574300  |
| C  | 0.93188200  | 2.21397700  | 1.92134600  |
| C  | 1.01733300  | 4.52401500  | 1.33404300  |
| H  | 2.00935300  | 4.93154900  | -0.52906500 |
| H  | 0.66027500  | 1.39139000  | 2.58551600  |
| H  | 0.79904500  | 5.56949200  | 1.53717800  |
| C  | 0.63578700  | 3.53475900  | 2.23145200  |
| H  | 0.12338700  | 3.77669300  | 3.15836200  |
| N  | 1.57366900  | 1.87664500  | 0.80684800  |
| Ni | 2.02383700  | -0.07988500 | 0.25988800  |
| C  | 2.65699000  | -3.57006900 | -1.88958000 |
| C  | 2.07278800  | -2.44028500 | -1.31752700 |
| C  | 2.52147900  | -1.96507500 | -0.08030600 |
| C  | 3.50347400  | -2.68886600 | 0.60276800  |
| C  | 4.07324000  | -3.81970500 | 0.02754600  |

|    |            |             |             |
|----|------------|-------------|-------------|
| C  | 3.66320900 | -4.26143900 | -1.22706500 |
| H  | 2.30413200 | -3.90716700 | -2.86324200 |
| H  | 1.26664600 | -1.94218200 | -1.84765900 |
| H  | 3.82981500 | -2.38056700 | 1.59118800  |
| H  | 4.84023700 | -4.36275600 | 0.57772600  |
| H  | 4.11195600 | -5.14646300 | -1.67399800 |
| Br | 0.05167700 | 0.11726200  | -1.04073800 |
| Br | 4.02906300 | 0.28922100  | 1.38382900  |

**Ni<sup>III</sup>(bpy)Br<sub>2</sub>(OTf)**

HF = - 6770.4712195 hartree

|    |             |             |             |
|----|-------------|-------------|-------------|
| C  | -2.35258100 | 1.44167200  | -0.71990300 |
| C  | -3.46280700 | 1.98027400  | -1.36009900 |
| C  | -4.27907600 | 1.14598000  | -2.11320500 |
| C  | -3.97448400 | -0.20526000 | -2.20192900 |
| C  | -2.84764200 | -0.67297200 | -1.54188600 |
| N  | -2.05412300 | 0.12970100  | -0.82833500 |
| H  | -5.14792200 | 1.55325500  | -2.62395900 |
| H  | -3.69086200 | 3.03914700  | -1.28309900 |
| H  | -4.59064900 | -0.89088000 | -2.77553000 |
| H  | -2.55777500 | -1.72152300 | -1.57247800 |
| C  | -1.43310100 | 2.23418900  | 0.12002800  |
| C  | -1.63403500 | 3.57273100  | 0.43910000  |
| C  | 0.50617000  | 2.17184600  | 1.40062100  |
| C  | -0.72070100 | 4.21141300  | 1.26833900  |
| H  | -2.49495900 | 4.11398000  | 0.05913800  |
| H  | 1.33588100  | 1.55981500  | 1.74786800  |
| H  | -0.86432100 | 5.25710900  | 1.52813400  |
| C  | 0.36571500  | 3.50286600  | 1.76456800  |
| H  | 1.09431700  | 3.96575100  | 2.42302600  |
| N  | -0.36659700 | 1.56426200  | 0.59428100  |
| O  | 4.00062100  | -1.24631100 | 0.10659900  |
| S  | 2.78178400  | -0.66750000 | -0.44672200 |
| O  | 1.70132400  | -0.50830500 | 0.58983400  |
| O  | 2.30301500  | -1.17824800 | -1.72981100 |
| C  | 3.21323300  | 1.08459400  | -0.79642700 |
| F  | 4.19936100  | 1.13842800  | -1.67899300 |
| F  | 3.59387200  | 1.69676100  | 0.31790600  |
| F  | 2.15688400  | 1.72336400  | -1.29290700 |
| Br | -0.43564100 | -2.81955600 | -0.30458800 |
| Ni | -0.28175100 | -0.39656900 | 0.08156600  |
| Br | -1.18244700 | -1.38954400 | 2.12163700  |

**4Pd<sup>d</sup>**

HF = - 2431.7162449 hartree

|   |             |             |             |
|---|-------------|-------------|-------------|
| C | -2.26684200 | -1.15907300 | -1.75623100 |
| C | -3.49167200 | -1.76520400 | -2.04130000 |
| C | -4.15599900 | -2.47412600 | -1.04646800 |

|   |             |             |             |
|---|-------------|-------------|-------------|
| C | -3.59176100 | -2.59015000 | 0.22046900  |
| C | -2.37275000 | -1.97087000 | 0.49033200  |
| C | -1.68434600 | -1.23457300 | -0.48413200 |
| H | -1.75765900 | -0.61731700 | -2.55792000 |
| H | -3.94197400 | -1.69484700 | -3.03229800 |
| H | -4.12439800 | -3.15317500 | 0.98833400  |
| H | -1.95906400 | -2.05742300 | 1.49843200  |
| O | -5.38198600 | -3.04958800 | -1.31224900 |
| C | -5.27432200 | -4.38195700 | -1.77046400 |
| H | -4.78601000 | -5.02440300 | -1.02074700 |
| H | -6.28883400 | -4.75017200 | -1.95214300 |
| H | -4.69709000 | -4.43640100 | -2.70707600 |
| P | 2.22883900  | 0.64215700  | 0.51278000  |
| P | -1.12188400 | 1.59779700  | 0.83186500  |
| C | 2.14540200  | 2.20203300  | 1.50202200  |
| H | 3.14118600  | 2.41520700  | 1.91586000  |
| H | 1.93823000  | 3.00324800  | 0.77508300  |
| C | 1.06619800  | 2.18863700  | 2.59058900  |
| H | 1.38766600  | 2.83504400  | 3.41905800  |
| H | 0.95842200  | 1.17972300  | 3.02320900  |
| C | -0.28832300 | 2.69032500  | 2.10007700  |
| H | -0.97868100 | 2.81357100  | 2.94491800  |
| C | -2.69478900 | 1.15393300  | 1.65536300  |
| C | -3.91675800 | 1.20036300  | 0.98115200  |
| C | -2.65259600 | 0.63493900  | 2.95347000  |
| H | -3.96349800 | 1.58728100  | -0.03693700 |
| C | -5.07924600 | 0.75375200  | 1.60191300  |
| C | -3.81496900 | 0.18984500  | 3.57335000  |
| H | -1.70229700 | 0.56803500  | 3.48726800  |
| H | -6.02710500 | 0.80089600  | 1.06846900  |
| C | -5.03180500 | 0.25046200  | 2.89857700  |
| H | -3.76976400 | -0.20598200 | 4.58636400  |
| H | -5.94222000 | -0.09697300 | 3.38340800  |
| C | -1.61596900 | 2.78295500  | -0.47088300 |
| C | -1.30015900 | 2.50582000  | -1.80255600 |
| C | -2.29214200 | 3.96959400  | -0.16193100 |
| H | -0.78372700 | 1.57470900  | -2.04307800 |
| C | -1.64439900 | 3.40203400  | -2.81203000 |
| C | -2.63779200 | 4.86229300  | -1.16851800 |
| H | -2.55774600 | 4.19291700  | 0.87231600  |
| H | -1.39074600 | 3.17750700  | -3.84632600 |
| C | -2.31193800 | 4.57962500  | -2.49439500 |
| H | -3.16377900 | 5.78210700  | -0.91992900 |
| H | -2.58214200 | 5.28135500  | -3.28126700 |
| C | 3.23895400  | 1.17949200  | -0.91594800 |
| C | 2.60823000  | 1.39687800  | -2.14337900 |

|    |             |             |             |
|----|-------------|-------------|-------------|
| C  | 4.60513800  | 1.45040800  | -0.79067500 |
| H  | 1.54386200  | 1.17703800  | -2.24392100 |
| C  | 3.32966400  | 1.87868500  | -3.23187300 |
| C  | 5.32625500  | 1.92861600  | -1.87894700 |
| H  | 5.10855300  | 1.28223400  | 0.16222200  |
| H  | 2.82981600  | 2.04165000  | -4.18488500 |
| C  | 4.68932800  | 2.14259700  | -3.09968800 |
| H  | 6.38977100  | 2.13559300  | -1.77469000 |
| H  | 5.25682600  | 2.51457900  | -3.95072000 |
| C  | 3.36787700  | -0.43050800 | 1.46424700  |
| C  | 3.69379700  | -0.18811300 | 2.80163500  |
| C  | 3.89141200  | -1.56750900 | 0.83427300  |
| H  | 3.30655100  | 0.68907800  | 3.31842200  |
| C  | 4.52626000  | -1.06387500 | 3.49526600  |
| C  | 4.72511200  | -2.43636400 | 1.52669100  |
| H  | 3.63905900  | -1.77507300 | -0.20632700 |
| H  | 4.77321700  | -0.86022100 | 4.53559500  |
| C  | 5.04302500  | -2.18781500 | 2.86037000  |
| H  | 5.12364000  | -3.31514800 | 1.02200900  |
| H  | 5.69384800  | -2.87061400 | 3.40337600  |
| H  | -0.16507900 | 3.68330900  | 1.64483200  |
| Pd | 0.09060000  | -0.29085300 | -0.01059600 |
| C  | 1.67217100  | -4.32011900 | -0.39394100 |
| C  | 1.02033000  | -3.16779100 | 0.04381500  |
| C  | 0.95049900  | -2.01457800 | -0.75037100 |
| C  | 1.53347500  | -2.07863800 | -2.02341300 |
| C  | 2.18503500  | -3.22963700 | -2.47160200 |
| C  | 2.26472100  | -4.35451700 | -1.65439700 |
| H  | 1.71739000  | -5.19643400 | 0.25382800  |
| H  | 0.56106600  | -3.16769600 | 1.03600000  |
| H  | 1.49865800  | -1.20775100 | -2.68344100 |
| H  | 2.63579000  | -3.24405600 | -3.46463100 |
| H  | 2.77641400  | -5.25196500 | -1.99978800 |

**TS3<sup>Pd</sup>**      **HF = - 2431.698607 hartree**       $\nu^\ddagger = - 277.39 \text{ icm}^{-1}$

|   |             |             |             |
|---|-------------|-------------|-------------|
| C | -2.06336500 | -1.33971600 | -1.81557800 |
| C | -3.38943500 | -1.69357100 | -2.04240400 |
| C | -4.12437300 | -2.31124600 | -1.03334000 |
| C | -3.52621600 | -2.57744200 | 0.19586100  |
| C | -2.20324300 | -2.21193500 | 0.41671400  |
| C | -1.43632500 | -1.58168200 | -0.57942100 |
| H | -1.50001500 | -0.86973100 | -2.62446200 |
| H | -3.86897900 | -1.49273700 | -3.00089700 |
| H | -4.11368500 | -3.06372900 | 0.97512400  |
| H | -1.75427100 | -2.43017600 | 1.38756700  |
| O | -5.44541000 | -2.64037200 | -1.24105900 |



|   |             |             |             |
|---|-------------|-------------|-------------|
| C | -5.61289900 | -3.92097000 | -1.81750500 |
| H | -5.19747600 | -4.70678700 | -1.16728700 |
| H | -6.68748600 | -4.08656700 | -1.94080500 |
| H | -5.12213800 | -3.98343300 | -2.80129800 |
| P | 2.28051200  | 0.64724600  | 0.43519300  |
| P | -1.07332500 | 1.63622900  | 0.86750100  |
| C | 2.19925300  | 2.22763300  | 1.39443300  |
| H | 3.20289500  | 2.50807300  | 1.74471400  |
| H | 1.90615300  | 2.99944800  | 0.66441800  |
| C | 1.18665500  | 2.17604100  | 2.54771000  |
| H | 1.55363100  | 2.79991200  | 3.37508800  |
| H | 1.11528000  | 1.15354400  | 2.95633600  |
| C | -0.20502300 | 2.67384200  | 2.16445800  |
| H | -0.84806200 | 2.72433300  | 3.05349100  |
| C | -2.64608900 | 1.18114000  | 1.68794200  |
| C | -3.86969700 | 1.23951700  | 1.01564800  |
| C | -2.60214600 | 0.60619700  | 2.96378200  |
| H | -3.92010700 | 1.66681400  | 0.01368300  |
| C | -5.02827900 | 0.75418300  | 1.61555500  |
| C | -3.76078100 | 0.12660500  | 3.56427800  |
| H | -1.65066300 | 0.52431200  | 3.49403300  |
| H | -5.97527900 | 0.81017800  | 1.08107100  |
| C | -4.97874400 | 0.20277200  | 2.89219100  |
| H | -3.71212100 | -0.30928400 | 4.56073600  |
| H | -5.88601900 | -0.17285700 | 3.36166900  |
| C | -1.57639000 | 2.88393000  | -0.37703800 |
| C | -1.26802400 | 2.65361800  | -1.71983800 |
| C | -2.24555900 | 4.06246400  | -0.02469700 |
| H | -0.75390400 | 1.73059100  | -1.99602600 |
| C | -1.61250700 | 3.58649900  | -2.69602400 |
| C | -2.59100800 | 4.99230100  | -0.99730300 |
| H | -2.50525100 | 4.24962500  | 1.01832300  |
| H | -1.36451800 | 3.39779300  | -3.73893300 |
| C | -2.27251000 | 4.75544600  | -2.33415600 |
| H | -3.11116800 | 5.90558300  | -0.71407400 |
| H | -2.54251900 | 5.48623500  | -3.09428900 |
| C | 3.28569500  | 1.14547500  | -1.01619200 |
| C | 2.67211200  | 1.19475500  | -2.27044500 |
| C | 4.62944500  | 1.51628800  | -0.89795100 |
| H | 1.62724000  | 0.89073100  | -2.36419400 |
| C | 3.38554800  | 1.61605400  | -3.39008100 |
| C | 5.34274700  | 1.93347200  | -2.01553700 |
| H | 5.12226800  | 1.47259500  | 0.07450800  |
| H | 2.89893700  | 1.65002100  | -4.36322200 |
| C | 4.72066800  | 1.98490100  | -3.26201500 |
| H | 6.38839800  | 2.21944800  | -1.91591900 |

|    |             |             |             |
|----|-------------|-------------|-------------|
| H  | 5.28191600  | 2.31030600  | -4.13608200 |
| C  | 3.44296800  | -0.40162300 | 1.38606600  |
| C  | 3.96258900  | -0.06281200 | 2.63832100  |
| C  | 3.77620600  | -1.64301800 | 0.82742800  |
| H  | 3.71830300  | 0.89349400  | 3.09990300  |
| C  | 4.80465300  | -0.94381900 | 3.31391500  |
| C  | 4.62139800  | -2.51715900 | 1.49888300  |
| H  | 3.35954500  | -1.92941800 | -0.14053400 |
| H  | 5.20423300  | -0.66627200 | 4.28780400  |
| C  | 5.13735200  | -2.16913900 | 2.74607100  |
| H  | 4.86965600  | -3.47802900 | 1.04985800  |
| H  | 5.79531700  | -2.85552700 | 3.27594000  |
| H  | -0.12976000 | 3.69772500  | 1.77092200  |
| Pd | 0.10580500  | -0.29031900 | -0.00750400 |
| C  | 1.57091900  | -4.30217900 | -0.09344000 |
| C  | 0.78212000  | -3.20560700 | 0.23966100  |
| C  | 0.43852700  | -2.23009900 | -0.71393500 |
| C  | 0.90771600  | -2.42329100 | -2.02659400 |
| C  | 1.70074700  | -3.51672500 | -2.35899100 |
| C  | 2.04116500  | -4.46591000 | -1.39481200 |
| H  | 1.82687500  | -5.03177100 | 0.67538100  |
| H  | 0.42644700  | -3.10293600 | 1.26706000  |
| H  | 0.64756600  | -1.70270700 | -2.80469500 |
| H  | 2.05592900  | -3.62954100 | -3.38352900 |
| H  | 2.65606900  | -5.32488100 | -1.65784500 |

**5Pd<sup>d</sup>**

**HF = -2431.7659992 hartree**

|   |             |             |             |
|---|-------------|-------------|-------------|
| C | 0.00252200  | 0.02995700  | -2.74353400 |
| C | -0.92981000 | 1.06430000  | -2.86980400 |
| C | -2.30728200 | 0.78359000  | -2.91489300 |
| C | -2.74936000 | -0.53386500 | -2.82771300 |
| C | -1.81563900 | -1.54950500 | -2.61421600 |
| C | -0.44426100 | -1.30210100 | -2.55274100 |
| H | 1.06325000  | 0.24075900  | -2.87673900 |
| H | -0.60520800 | 2.09222600  | -3.02920700 |
| H | -3.80566100 | -0.78224900 | -2.88602200 |
| H | -2.17272700 | -2.57439400 | -2.50837900 |
| O | -3.11587300 | 1.86230400  | -3.05400700 |
| C | -4.51023900 | 1.63352300  | -3.09696200 |
| H | -4.86184500 | 1.14868200  | -2.17384000 |
| H | -4.98008000 | 2.61554400  | -3.18975700 |
| H | -4.78807100 | 1.01506300  | -3.96172100 |
| P | 1.94886100  | 1.11815600  | 0.64133700  |
| P | -1.59115500 | 0.34162200  | 1.33571100  |
| C | 1.45616200  | 1.82289600  | 2.29054500  |
| H | 2.34861200  | 2.15671500  | 2.84067600  |

|   |             |             |             |
|---|-------------|-------------|-------------|
| H | 0.88510800  | 2.73545100  | 2.05756700  |
| C | 0.61771800  | 0.86830800  | 3.15184200  |
| H | 0.81762100  | 1.09912400  | 4.20834400  |
| H | 0.97411600  | -0.16512800 | 3.01307000  |
| C | -0.90100300 | 0.94132900  | 2.96174100  |
| H | -1.40423100 | 0.40835500  | 3.78344600  |
| C | -1.87769200 | -1.45689100 | 1.60119300  |
| C | -2.79751800 | -2.10871600 | 0.76779500  |
| C | -1.12487800 | -2.22497400 | 2.49399300  |
| H | -3.38351300 | -1.52693000 | 0.05304000  |
| C | -2.96242100 | -3.48656600 | 0.82909200  |
| C | -1.28172400 | -3.60947600 | 2.54769500  |
| H | -0.40795200 | -1.74903100 | 3.16195800  |
| H | -3.68535500 | -3.97357300 | 0.17608600  |
| C | -2.19804300 | -4.24441100 | 1.71660500  |
| H | -0.68618100 | -4.19088300 | 3.24971400  |
| H | -2.32074000 | -5.32501900 | 1.76034600  |
| C | -3.30457800 | 1.00937000  | 1.45300300  |
| C | -3.74986200 | 1.89424200  | 0.46852600  |
| C | -4.16458500 | 0.67534100  | 2.50565600  |
| H | -3.08834500 | 2.14581800  | -0.36506400 |
| C | -5.02754700 | 2.44770800  | 0.53963000  |
| C | -5.44026400 | 1.22235900  | 2.57511600  |
| H | -3.83672400 | -0.02671600 | 3.27385200  |
| H | -5.36328800 | 3.14021300  | -0.23123900 |
| C | -5.87201500 | 2.11222700  | 1.59258700  |
| H | -6.10187100 | 0.95501300  | 3.39743900  |
| H | -6.87109800 | 2.54088000  | 1.64804600  |
| C | 3.00260200  | 2.49300500  | 0.00498300  |
| C | 2.46345700  | 3.29701600  | -1.00372300 |
| C | 4.27944300  | 2.78725800  | 0.49356100  |
| H | 1.47070600  | 3.05922400  | -1.39571400 |
| C | 3.17688100  | 4.38078100  | -1.50844100 |
| C | 4.99888000  | 3.86275400  | -0.01746900 |
| H | 4.72130400  | 2.16655800  | 1.27432100  |
| H | 2.74347100  | 4.99969300  | -2.29231300 |
| C | 4.44794100  | 4.66210800  | -1.01695700 |
| H | 5.99485000  | 4.07880600  | 0.36595200  |
| H | 5.01363800  | 5.50248600  | -1.41546300 |
| C | 3.18035100  | -0.17449500 | 1.09888300  |
| C | 3.86607600  | -0.21982700 | 2.31841000  |
| C | 3.43082200  | -1.17667900 | 0.15395900  |
| H | 3.68503800  | 0.53604800  | 3.08252400  |
| C | 4.78626400  | -1.23121700 | 2.57861700  |
| C | 4.35856200  | -2.18177900 | 0.40808700  |
| H | 2.88168300  | -1.17703200 | -0.79215900 |

|    |             |             |             |
|----|-------------|-------------|-------------|
| H  | 5.30854100  | -1.25273400 | 3.53367200  |
| C  | 5.03818200  | -2.21114600 | 1.62254800  |
| H  | 4.53691900  | -2.95098300 | -0.34238200 |
| H  | 5.75748700  | -3.00192500 | 1.82803100  |
| H  | -1.22137300 | 1.99252100  | 3.03321500  |
| Pd | -0.07833200 | 0.60231200  | -0.42845100 |
| C  | 1.13879800  | -4.38606800 | -1.05205100 |
| C  | 0.23088700  | -3.37028600 | -1.32847000 |
| C  | 0.51890300  | -2.39082800 | -2.28930000 |
| C  | 1.74459300  | -2.45895100 | -2.96219600 |
| C  | 2.65214600  | -3.47716700 | -2.68734200 |
| C  | 2.35349800  | -4.44515800 | -1.73143600 |
| H  | 0.89565900  | -5.13030300 | -0.29442000 |
| H  | -0.70933200 | -3.31790600 | -0.77510000 |
| H  | 1.98196700  | -1.71638700 | -3.72437500 |
| H  | 3.59687000  | -3.51733100 | -3.22768900 |
| H  | 3.06562400  | -5.23991500 | -1.51552900 |

**4<sub>r</sub><sup>Ni</sup>**

**HF = -6272.1195786 hartree**

|   |             |             |             |
|---|-------------|-------------|-------------|
| C | 2.46087400  | 3.30791300  | 1.12585300  |
| C | 1.49381300  | 2.30084600  | 1.06290800  |
| C | 1.56337100  | 1.32078300  | 0.07465900  |
| C | 2.62807600  | 1.34175300  | -0.82709400 |
| C | 3.59660100  | 2.33898600  | -0.74803900 |
| C | 3.51609300  | 3.33118300  | 0.22462900  |
| H | 2.37782000  | 4.06922400  | 1.90057300  |
| H | 0.69621800  | 2.29869900  | 1.80063200  |
| H | 2.72166700  | 0.57802000  | -1.59406400 |
| H | 4.42112100  | 2.33271900  | -1.45989600 |
| H | 4.27376000  | 4.11055200  | 0.28263400  |
| C | -2.70160300 | 0.73554600  | -0.02454000 |
| C | -3.87163600 | 1.48410900  | -0.12954600 |
| C | -3.79128500 | 2.86658300  | -0.19805400 |
| C | -2.54055100 | 3.46761100  | -0.17837500 |
| C | -1.41844800 | 2.65805900  | -0.07897800 |
| N | -1.49352000 | 1.32973500  | 0.01877100  |
| H | -4.69622700 | 3.46354400  | -0.27775600 |
| H | -4.84085800 | 0.99675200  | -0.17339400 |
| H | -2.42529000 | 4.54529600  | -0.24727500 |
| H | -0.41752400 | 3.08477600  | -0.08277000 |
| C | -2.70162900 | -0.73552100 | 0.02444600  |
| C | -3.87169300 | -1.48402600 | 0.12951700  |
| C | -1.41856800 | -2.65809100 | 0.07880800  |
| C | -3.79140900 | -2.86650500 | 0.19801500  |
| H | -4.84088800 | -0.99662200 | 0.17342700  |
| H | -0.41767300 | -3.08486900 | 0.08255300  |

|    |             |             |             |
|----|-------------|-------------|-------------|
| H  | -4.69637500 | -3.46342000 | 0.27777900  |
| C  | -2.54070700 | -3.46759000 | 0.17825800  |
| H  | -2.42549100 | -4.54528100 | 0.24714300  |
| N  | -1.49356900 | -1.32976200 | -0.01892900 |
| Ni | 0.12132600  | -0.00001700 | -0.00001300 |
| C  | 1.49399800  | -2.30079800 | -1.06290500 |
| C  | 2.46109200  | -3.30783400 | -1.12578700 |
| C  | 3.51619500  | -3.33113200 | -0.22442700 |
| C  | 3.59655800  | -2.33898500 | 0.74830300  |
| C  | 2.62799800  | -1.34178100 | 0.82729200  |
| C  | 1.56339200  | -1.32079800 | -0.07458200 |
| H  | 0.69650600  | -2.29860800 | -1.80074100 |
| H  | 2.37816600  | -4.06909800 | -1.90056800 |
| H  | 4.42099400  | -2.33273500 | 1.46025800  |
| H  | 2.72147700  | -0.57808200 | 1.59430700  |
| H  | 4.27388900  | -4.11047800 | -0.28238100 |
| Br | 0.02941600  | -0.26917600 | 2.30036300  |
| Br | 0.02967000  | 0.26913100  | -2.30039700 |

**TS3<sub>h</sub><sup>Ni</sup>**      **HF = -6272.11233 hartree**       $v^{\ddagger} = -215.90 \text{ icm}^{-1}$

|   |             |             |             |
|---|-------------|-------------|-------------|
| C | 2.82282200  | 3.00024400  | 0.98428000  |
| C | 1.95603700  | 1.90869200  | 1.04851700  |
| C | 1.78142700  | 1.07349000  | -0.06104200 |
| C | 2.55568300  | 1.31575400  | -1.20242300 |
| C | 3.42827400  | 2.39616100  | -1.25225500 |
| C | 3.56063800  | 3.25463000  | -0.16394200 |
| H | 2.91563500  | 3.64854600  | 1.85461200  |
| H | 1.41320700  | 1.72540600  | 1.97109100  |
| H | 2.48935300  | 0.65602100  | -2.06203500 |
| H | 4.01674300  | 2.55886500  | -2.15418100 |
| H | 4.24228400  | 4.10194100  | -0.20751100 |
| C | -2.70491400 | 0.73706100  | 0.05250300  |
| C | -3.86198500 | 1.50933700  | 0.10265800  |
| C | -3.74682300 | 2.89011100  | 0.19942600  |
| C | -2.48421900 | 3.46806900  | 0.24249900  |
| C | -1.37586500 | 2.63335800  | 0.18616700  |
| N | -1.49200200 | 1.31198800  | 0.09696400  |
| H | -4.64009700 | 3.50857200  | 0.23816800  |
| H | -4.84424400 | 1.04679900  | 0.06642900  |
| H | -2.35424900 | 4.54385900  | 0.31629600  |
| H | -0.35693400 | 3.02336000  | 0.21423500  |
| C | -2.70493200 | -0.73704700 | -0.05249900 |
| C | -3.86202600 | -1.50928300 | -0.10271000 |
| C | -1.37594300 | -2.63339600 | -0.18605200 |
| C | -3.74691000 | -2.89006200 | -0.19944500 |
| H | -4.84427200 | -1.04671000 | -0.06655200 |

|    |             |             |             |
|----|-------------|-------------|-------------|
| H  | -0.35702600 | -3.02343700 | -0.21405000 |
| H  | -4.64020500 | -3.50849200 | -0.23823000 |
| C  | -2.48432500 | -3.46806800 | -0.24242400 |
| H  | -2.35438900 | -4.54386400 | -0.31618300 |
| N  | -1.49203500 | -1.31201800 | -0.09688900 |
| Ni | 0.11840700  | -0.00003500 | 0.00001700  |
| C  | 1.95611600  | -1.90866100 | -1.04854700 |
| C  | 2.82300900  | -3.00013000 | -0.98435900 |
| C  | 3.56092300  | -3.25443600 | 0.16381700  |
| C  | 3.42853800  | -2.39598000 | 1.25213800  |
| C  | 2.55583700  | -1.31566000 | 1.20235600  |
| C  | 1.78149500  | -1.07346900 | 0.06101700  |
| H  | 1.41322000  | -1.72542700 | -1.97109300 |
| H  | 2.91583500  | -3.64842300 | -1.85469600 |
| H  | 4.01708200  | -2.55862100 | 2.15402600  |
| H  | 2.48949200  | -0.65593400 | 2.06197300  |
| H  | 4.24266200  | -4.10167500 | 0.20734300  |
| Br | -0.16235800 | -0.21663400 | 2.31893600  |
| Br | -0.16245300 | 0.21652300  | -2.31890000 |

**5<sub>n</sub>Ni**

**HF = -6272.1872546 hartree**

|   |             |             |             |
|---|-------------|-------------|-------------|
| C | 0.57266700  | 2.97705100  | 0.96216700  |
| C | 1.35278100  | 1.80677000  | 0.97179600  |
| C | 2.26359200  | 1.54906300  | -0.07952100 |
| C | 2.35451000  | 2.47850400  | -1.12281800 |
| C | 1.58487900  | 3.63125100  | -1.11145500 |
| C | 0.68339300  | 3.88468400  | -0.07352100 |
| H | -0.09693200 | 3.17177800  | 1.79815200  |
| H | 1.39689200  | 1.21383400  | 1.88213400  |
| H | 3.06000500  | 2.30134300  | -1.93349300 |
| H | 1.68759400  | 4.35021400  | -1.92247700 |
| H | 0.08287600  | 4.79162600  | -0.08040100 |
| C | -3.04216400 | -0.45006900 | 0.30273900  |
| C | -4.40068400 | -0.26221400 | 0.04543000  |
| C | -5.04333200 | 0.82914200  | 0.61590400  |
| C | -4.31625000 | 1.69477100  | 1.42167800  |
| C | -2.96480800 | 1.42831900  | 1.61729600  |
| N | -2.33880600 | 0.38777600  | 1.07519900  |
| H | -6.09910300 | 1.00433200  | 0.42219900  |
| H | -4.94556400 | -0.93305400 | -0.61387300 |
| H | -4.77904200 | 2.56172900  | 1.88579100  |
| H | -2.35625000 | 2.08360200  | 2.24155500  |
| C | -2.30107000 | -1.57207000 | -0.31813300 |
| C | -2.94136800 | -2.74449100 | -0.71870500 |
| C | -0.27156900 | -2.39628500 | -1.12054100 |
| C | -2.22022700 | -3.74757100 | -1.34711000 |

|    |             |             |             |
|----|-------------|-------------|-------------|
| H  | -4.00170600 | -2.87335400 | -0.52013300 |
| H  | 0.79489400  | -2.20982000 | -1.23938400 |
| H  | -2.71630600 | -4.66307500 | -1.65932200 |
| C  | -0.85962300 | -3.56750000 | -1.56485600 |
| H  | -0.25444300 | -4.32183700 | -2.05846700 |
| N  | -0.97503500 | -1.43315800 | -0.51065900 |
| Ni | -0.01829500 | 0.08411700  | 0.12448500  |
| C  | 3.22832000  | -0.44221700 | -1.22151800 |
| C  | 4.00397300  | -1.59619500 | -1.21612300 |
| C  | 4.71257200  | -1.95537800 | -0.07170700 |
| C  | 4.64084200  | -1.15608200 | 1.06594800  |
| C  | 3.84846900  | -0.01389700 | 1.06782200  |
| C  | 3.13314700  | 0.35396100  | -0.07428800 |
| H  | 2.66265900  | -0.16614600 | -2.11299700 |
| H  | 4.05475500  | -2.21726200 | -2.10881600 |
| H  | 5.20078400  | -1.42691400 | 1.95929900  |
| H  | 3.78701900  | 0.60508200  | 1.96249600  |
| H  | 5.32448900  | -2.85558600 | -0.06899500 |
| Br | 0.66603900  | -1.22375300 | 1.90858800  |
| Br | -0.75751900 | 1.22857000  | -1.72154700 |
